# Supplementary material for: PPARβ Interprets a Chromatin Signature of Pluripotency to Promote Embryonic Differentiation at Gastrulation
Source: PLoS One. 2013 Dec 18;8(12):e83300. doi: 10.1371/journal.pone.0083300 (PMC3867458; doi:10.1371/journal.pone.0083300)
Supplement: Table S2 — (XLS) [file pone.0083300.s009.xls]

## Sheet: Feuil1
Nodal signaling	Nodal positif	Nodal negatif	Wnt PCP signaling	Wnt beta-catenin signaling	Wnt beta-catenin positif	Wnt beta-catenin negatif	BMP signaling	BMP positif	BMP negatif	prospective BMP2 targets	FGF MAPK positif	FGF Akt positif	FGF PKC positif	FGF full	Endoderm specification master genes	Endoderm genes induced by Nodal	Endoderm genes not induced by Nodal	Induced by Mixer and Sox17b	Induced by Mixer	Induced by Sox17b	Induced by mixer or Sox17b	Mesoderm specification master genes	Neurectoderm specification	Early neural differentiation	Somitogenesis Myogenesis	Spemann-Mangold	Regulated by ectopic organizer as in DOR	Regulated by ectopic organizer	Ventral Center	Positive regulators of Neural Crest	MAPK	Anterior mesoderm Tanegashima_2009	Notochord Tanegashima_2009	Presomitic mesoderm Tanegashima_2009	Eye field genes required for eye formation	Brain_expression	Neural_expression	Head_expression	Muscle_expression	Heart_expression	Keller_expression	Fat_expression	Skin_expression	Eye_expression	Blastopore_expression	Tail_expression	Somite_expression	Mesoderm_expression	Endoderm_expression
manually curated	manually curated	manually curated	manually curated	manually curated	manually curated	manually curated	manually curated	manually curated	manually curated	Peiffer et al., 2004	manually curated	manually curated	manually curated	manually curated	manually curated	sinner et al., 2006	sinner et al., 2007	Dickinson et al., 2005	Dickinson et al., 2006	Dickinson et al., 2007	Dickinson et al., 2008	manually curated	manually curated + Shin et al. 2004	Strong expression in neural tissues at neurula and weak/no expression in prospective neuroectoderm at gastrula; Shin et al. 2004	manually curated	manually curated	Hufton et al., 2006	Hufton et al., 2007	manually curated	manually curated	manually curated	Tanegashima et al. 2009	Tanegashima et al. 2010	Tanegashima et al. 2011	Viczian et al. 2009	Xenbase_anatomy	Xenbase_anatomy	Xenbase_anatomy	Xenbase_anatomy	Xenbase_anatomy	Xenbase_anatomy	Xenbase_anatomy	Xenbase_anatomy	Xenbase_anatomy	Xenbase_anatomy	Xenbase_anatomy	Xenbase_anatomy	Xenbase_anatomy	Xenbase_anatomy
tdgf1	tdgf1	lefty-a	Rhob	apc	bcl9	apc	bmp2	bmp2	fst	id3	ncam1	ncam1	ncam1	ncam1	sox17a-a	admp	fbln1	foxa1-a	P7E4	psmg2	foxa1-a	chd	sox2	ddit4	myod1	nog	acadl	LOC100158389	bmper	snai1	map2k1ip1	ambp	arf4	atp2a2	pax6	pcsk6	arx	hand1	chrnd	slc16a12	scel	hsd17b14	enox1	herc6	chrd	tgfb2	mef2a	sec31b	mixer
tdgf3	tdgf3	lefty-b	Rhoa	bcl9	beta-catenin	btrc	bmp2-b	bmp2-b	nog	pcca	csk-A	fgfr4	fgfr4	fgfr4	sox17b.1-a	cml-A	MGC84100	foxa1-b	wnt11	otx2-a	foxa1-b	fgf4	fgf4	gatm	Rnd1	chrd	admp	acadl	twsg1	snai2	map2k3	atp1a1	arfgap1	chrna1	six3	efnb2	foxm1	kitlg	chrna1	fzd1	bace2	khk	kremen2	fam83a	phox2a	mamdc2	dkk1	akr1c1	gjb6
acvr2a	acvr2a	cer1	rock2	beta-catenin	cdc73	cby1	bmp7.1	bmp7.1	chrd	itgb1bp2	mapk7	fgf13	fgf13	fgf13	sox17a-b	gata4	sqrdl	cxcr4-a	sox17a-a	otx2-b	cxcr4-a	egr1	zic1	xptch-2	Rnd3	cer1	amfr	admp	tll1	snai2-a	map2k5	bmp7.1	bcar3	chrnd	sox2	klhdc4	mos	kmo	tusc4	tnnt2	arhgap12	slc25a36	lrp5	kifc3	tbx2	ebpl	c12orf4	ddx10	foxa1
acvr2b	acvr2b	drap1	mapk8	btrc	csnk1g2	cer1	bmp1	bmp1	cer1	slc4a2	fgfr4	fgf4	fgf4	fgf4	hnf4a	gjb6	ventx3.2	cxcr4-b	sox17a-b	nr2f2	cxcr4-b	egr1-b	zic3	rgma	itga5	fst	bambi	amfr	bambi	cdkn1a	map2k6	c14orf135	c7orf20	chrng	pax2	arfrp1	fgf20	esrra	tnnc1	metap1	adam33	tnpo1	wnt4	mtmr14	tll1	clcc1	taok3	cd276	gata6
acvr1b	acvr1b	ppm1a	wnt11	cby1	dvl2	CtBP	tll2	tll2	bmper	rpl15	fgf13	fgfr1	fgfr1	fgfr1	gata5	MGC81482	xdhcr7	frzb-1	sox17b.1-a	foxc1	frzb-1	wnt11	sox15	h2afz	fxr1	frzb-1	bix1.3	aplnr	bmp7.1	foxd3	map2k7	c3	calr	cugbp1-b	dkk1	wrb	ttc25	eaf1	fut10	myh6	polrmt	ahsg	herc6	slc38a5	ptprf	jag1	myf5	fam168a	gatm
smad2	smad2	smad7	wnt4	cdc73	dvl3	dact1	fst	smad4	twsg1	gnb2l1	fgf4	fgfr-4c	fgfr-4c	fgfr-4c	gata-5b	six1	bmp2-b	cpeb1	mab21l2-a	pdgfa	cpeb1	wnt8a	fst	tspan1	hes4-a	frzb2	bix4	aplnr	bmp4-a	foxd3b-A	map3k10	ccnd1	calu	cul2	crx	mrps24	sall3	slc26a4	hsp70	mamdc2	pcyt1a	insig2	tp53i3	cyp2d6	tspan33	ttc21a	thbs4	flad1	zcchc8
smad4	smad4	smurf2	dvl2	cer1	fzd1	dkk1	nog	smad4.2	bambi	fgfr2	fgfr1	fgfr1-A	fgfr1-A	fgfr1-A	LOC397845	slc5a8	c14orf109	aplnr-a	gata5	eomes	aplnr-a	wnt8b	nog	cldn6.2	hes4-b	admp	bowline	arl5a	bmp4-b	mmp14	map3k12	ccnh	cd81	cyyr1	xanf-1	ppie	fgf13	ap1m2	pdcd2	nudt13	map3k12	cog6	khnyn	slc34a2	mixer	asb12	kbtbd10	shh	pcsk6
smad4.2	smad4.2	smurf1	wnt5a-b	csnk1g2	fzd10-a	gsk3b	chrd	LOC397711	lemd3	ttf2	fgfr-4c	fgfr2	fgfr2	fgfr2	der	val	chek1	aplnr-b	itln1	tubg1	aplnr-b	t	chrd	MGC53066	hes9.1	sfrp2	cer1	cebpa	szl-a	mmp15	map3k3	crx	chrd	ddr1	otx1	chst2	rab27a	akr1d1	spsb3	snap23	myo1d	slco2a1	gpr89b	dio3	pfn2	rapsn	fgf13	slc45a2	c3orf57
mixer	mixer	smad6	fzd7	CtBP	fzd10-b	LOC398097	cer1	bmpr1a	smad6	nipsnap1	fgfr1-A	fgf3	fgf3	fgf3	nodal1	wnt11	LOC398568		xfd2'	Foxd1	P7E4	mix1-a	nodal3	LOC398264	hen2-a	dkk1	chrd	cenp-n	szl-b	mmp21	map3k7	cxcr4-a	clgn	des.1	rax-a	pwp1	eya3	mark3	loxl2	popdc2	mdn1	fam195a	rnf170	lfng	arhgap12	adam33	ednra	mib2	rarg
foxh1	foxh1	smad7	vangl2	dact1	fzd2	map3k7ip1	bmper	bmpr2	smad7	ndufa8	fgfr2	fgf8	fgf8	fgf8	nodal2	xNaDC-3	MGC52683		myc-a	gsc	wnt11	mixer	sox3	MGC132155	myf5	lefty-a	chrd	chrd		mmp24	map3k7ip1	cxcr4-b	cltc	fbxl22	rax-b	mapk12	tfap2a	hoxa1	tead1	npr3	frrs1	fggy	rgs7bp	runx1	arnt	kctd15	txnip	tatdn1	rc3h1
lefty-a	mix1-a	rnf111a	cdc42	dkk1	fzd3	nlk	smad4	acvr2a	smurf2	pif1	fgf3	hs2st1	hs2st1	hs2st1	nodal	cer1	MGC81526		myc-b	lhx1	sox17a-a	fgf3	bmper	hnrpdl	actc1	lefty-b	cml-A	chrd		mmp3	map3k7ip3	depdc7	col18a1	fgfr1	otx2-a	tmem53	gli3	msgn1	dnajb4	nes	smurf1	hand2	bend5	adam9	myod1	tnni1	prdm1	grlf1	hhex
lefty-b	mix1-b	rnf111b	syndecan-4.2	dvl2	fzd4	sfrp1	smad4.2	acvr2b	smurf1	ventx2.2	fgf8	hs3st1	hs3st1	hs3st1	nodal3	frzb-1	nodal			twist1	sox17a-b	fgf8	neurog2-b	MGC81231	rbmx	nodal1	crx	cml-A		nrp1	map9	enpp2	col9a2	foxd2	otx2-b	rnf20	fgf3	phox2b	nt5c3	orai2	dcp2	egfl7	scel	b4galt4	clock	capn3	myl1	wdr78	insm1
mix1-a	nodal1		syndecan-4.1	dvl3	fzd5	sfrp2	runx2	acvr1	tob1	xpo	hs2st1	akt1	spred1	fgfrl1	frzb-1	gata5	tor2a				sox17b.1-a	eomes	neurog2-a	sat1	gata6	nodal2	dck	crx		nrp2	mapk1	f2rl1	copa	fzd2	hes1-a	scmh1	dvl2	mett11d1	adhfe1	hisppd1	insrr	loxl2	slc44a4	mapk15	t	gpr89b	pds5a	trub2	ogdh
mix1-b	nodal2		gprc5b	fzd1	fzd6	tle4	ventx2.2	znf423	TOB2		hs3st1	gab1	plcg1	fyn	mix1-a	gata-5b	alg1				mab21l2-a	lhx1	otx2-a	cnbp	mespb	nodal	dkk1	csde1		slit2	mapk11	fbp1	copb2	hapln3	hes1-b	c9orf114	trim36	fbxw2	isoc2	ing1	lrrc8a	atp6v0d2	chmp5	uba1	tbpl2	klhl25	actc1	cand1	prkd1
nodal1	nodal		prkcd	fzd10-a	gpr177	csnk1a1-a	ventx1.3	runx2			map2k6	pik3c3	pkc-delta1	tklal-a	mix1-b	gata6	ccdc53				gata5	sox17a-a	otx2-b	MGC84284	tbx6	nr6-A	dusp1	dhx33		kit-A	mapk12	gfpt1	cope	hoxc6	zic2	tcp1	mex3b	adck1	actn2	abhd5	rab36	abhd14b	fam83a	spopl	ppara	cryz	gpc4	tbx3	grip2
nodal2	nr6-A		camk2d	fzd10-b	lrp5	csnk1a1-b	wnt8a	ventx2.2			map3k3	pik3r2	fgfr3-a	src1-A	mixer	kcnk6	CTP				itln1	sox17b.1-a	cyp26a1-a	MGC82506	bowline	nodal3	egr1	dkk1		kitlg	mapk14	gsc	copg	kbtbd10	zic2-b	ccnk	pax3	naalad2	cenpv	tm9sf1	asb3	hvcn1	alg10b	wif1	stx19	p2rx4	nrarp	eps8l3	anxa3
nodal	pcsk6		rac1a	fzd2	lrp6	szl-a	twsg1	ventx1.3			mapk15	akt2	fgfr3-b	yes1	bix1.3	LOC100158295	dazl				xfd2'	sox17a-b	tfap2a-a	rrm2.2	stripy	shh	eomes	egln3		kl1-A	mapk15	gsto1	coq10a	LOC495481		mars	ednra	tnnc1	zfand2a	nfatc3	sp4	fgb	cdkn1a	tox2	pptc7	chrnd	rhou	nipal3	psmd8
nr6-A	furin		rac1b	fzd3	pip5k1a	szl-b	bambi	wnt8a			map2k1	fgfr3-a	fgf3	src	bix2-A	mespa	der				myc-a	gsc	tfap2a	cxcr7	hes3.3	igfbp5	epha4	egln3		sh3rf1	mapk1b	krt19	cpne3	MGC68707		xab2	snai2	hyi	bag3	hmgcl	opa3	tmem206	rhof	hao2	adam33	lfng	top2a	rps15a	ccdc124
cer1	furin			fzd4	pip5k1b		LOC397711	bmp4-a			map2k5	fgfr3-b	flrt3-a	lyn	bix3-A	MGC82744	dtna-A				myc-b	fkh1-A	sfrp2	mcts1	tle4	sfrp2	evx1	egln3		meis1	mapk7	LOC100037095	creld2-b	MGC80131		ncl	hk1	fam185a	srd5a3	mks1	tp53inp1	hoxa2	rad52	znf277	cdx2	mapk15	aldh1a2	c21orf91	actr3
pitx2	med15			fzd5	porcn		bmpr1a	bmp4-b			ptpn11	fgf3	flrt3-b	csk-A	bix4	MGC84761	LOC100037010				psmg2	vegt	lrig3	TMSB4X	tcf3	fkh1-A	fam113a	egr1		zic1	mapk8	mcm4	csnk1e	MGC81925		scfd1	zeb2	wnt11	unc45b	pja2	ncapg2	efnb1	mcm9	hmgcl	caskin2	bid	ppp6c	rhpn2	tcf7l1
pcsk6	zfyve9			fzd6	pygo2-a		bmpr2	smad1-a			mapkbp1	flrt3-a	rac1a	mapk7	gsc	msgn1	LOC100158277				otx2-a	foxa4	sox11a	cep57	msgn1	foxa4	fd-12'-a	esr10-A		zic2	mapkap1	mcm7-a	csrp2	MGC84761		col18a1	epb41l3	hsp70	cacng1	rad1	igf1r	capn11	pigo	cdc42ep3	cdc6	ift74	gns	tm7sf2	aldh1a2
furin				gpr177	pygo2-b		lemd3	smad1-b			mapk1	flrt3-b	rac1b	map2k6	cer1	tll1	LOC398520				otx2-b	bix1.3	gmnn	LOC397887	pax3		fgf20	evx1		zic2-b	mapkapk2	MGC81002	dad1	micall2		ufd1l	grhl1	pdcd2	frzb	sema4g	zic4	cfi	masp2	nck1	fam59a	zfpl1	c5orf32	polr1b	mst1
drap1				gsk3b	rspo2		acvr2a				mapk14	pik3r1-a		map3k3	hhex	xenf	MGC114680				nr2f2	bix2-A	zic5	tmem126a	pax6		fkh1-A	fd-12'-a		zic3	mapkbp1	msh6	dag1	mybph		dmap1	c10orf119	adh1c	efs	dcaf8l1	appbp2	pigo	zfpl1	c20orf112	lysmd1	hook3	efnb2	kng1	pgam5
ppm1a				LOC398097	smarcd1		acvr2b				mapk8	pik3r1-b		mapk15	chrd	sox17a-b	MGC69132				foxc1	bix4	fzd7		pax7		foxa4	fgfr2		zic5	mapksp1-b	nasp	dnajb9	myl1		c7orf41	sart1	fkbp7	mthfs	grk6	rsph3	masp2	smad3	mast3	aaas	polrmt	csnk1g1	wdtc1	gata4
med15				lrp5	tcf7l1		acvr1				map2k7			map2k1	t	bix1.3	MGC81142				pdgfa	nodal1	otx1		tll1		foxb1	fkh1-A		pax3	dusp6	nat11	dnajc1	mylpf		c12orf41	gsto1	tspan9	dhdpsl	tnnc1	bphl	hoxc8	hoxc8	ddit3	arntl	myo1d	klhdc4	nit1	gjb1
smad7				lrp6	wnt3a		smad6				map3k10			map2k5	nr6-A	bix2-A	MGC81360				eomes	nodal2	hist2h3d		hoxa1		foxd3	foxd3		twist1		ncapd2	dyrk1a.2	myo1c		tomm70a	lgals3	foxo6	tbce	actn2	yme1l1	hgd	dnm1l	mmp3	xpa	tnnc1	akirin1	zbtb34	txnip
zfyve9				map3k7ip1	wnt8a		smad7				raf1			ptpn11	foxa1-a	bix4	MGC82549				tubg1	nodal	MGC68579		hoxa7		foxd3b-A	foxd3b-A		itgb1-a		nkx2-5	eef1a1	myod1		cfp	ap2a2	prss27	cnot6l	hand1	adam17	fstl3	alad	caskin2	fam164a	asb3	btg2	fem1c	rbm25
smurf2				nlk	wnt8b		znf423				ralb			mapkbp1	foxa1-b	gsc	MGC83900				Foxd1	nr6-A	ccnd1		hoxa9		foxd4l1.1-a	foxd4l1.1-a		itgb1-b		otx1	eif2b3	nexn		slc25a24	psmd8	qrsl1	brms1	esrra	hmbox1	proc	kcnab2	c14orf45	nup160	mal	prelid1	slc9a1	rplp1
smurf1				nodal3	lef1-a		smurf2				rasgrp2-b			mapk1	gata4-a	mix1-b	MGC84239				gsc	hhex	tcf7l1		hoxb4		foxf1	foxf1		Lrig3		otx2-a	enc1.2	notch1		akr1b1	ncapg	lyn	foxd3	hyi	ints4	serpina1	fut6	grem1	hic2	atp1b2	hk1	slc38a10	atp5f1
smad6				pip5k1a	lef1-b		smurf1				ras			mapk14	gata4-b	otx2	MGC86453				lhx1	cer1	MGC81734		hoxb6		frzb-1	foxi1		sox9-a		otx2-b	epha2	pdcl3		psen1	sox2	rassf1	prkca	fam185a	slc35a5	slc36a1	mal	tmem145	kiaa1919	tssc1	frg1	gbe1	xbp1
smad7				pip5k1b			tob1				rala			mapk8		bix3-A	mlh1				twist1	ventx2.2			hoxc5		frzb2	frzb-1		sox9-b		pcna	eprs	pygm		copg	slbp	trps1	nck1	wnt11	mmp21	rhog	tollip	sgtb	xpo6	chrna1	c19orf47	kcp	smg7
rnf111a				porcn			TOB2				spry2			map2k7		cass4	prmt5					otx2-a			hoxc6		fzd10-b	frzb2		msx1a		pmf1	fam18b	rassf5		idh3g	khsrp	anapc5	akr1d1	nfe2	hoxa7	cryz	atp1b2	irf8	acvr2b	col6a1	myod1	exog	cbfa2t2
rnf111b				pygo2-a			bmp4-a				spry1-a			map3k10		cxcr4-b	prrg1					otx2-b			hoxd1		fzd10-b	fzd10-b		msx1b		pomp	fam20b	rbm24		zic1	c17orf85	fzd4	spata2	grk4	tead1	chrng	slc1a3	c11orf9	polrmt	phlda1	glud1	lhx3	hnrnpa1
t				pygo2-b			bmp4-b				spry1b			raf1		eomes	ptpn3								hoxd3		fzd4	fzd4		myc-a		prdm1	fam49b	sdad1		sfrp2	nkx2-5	tekt3	mrps24	agtpbp1	spata2	folr1	limk2	ribc1	ism1	gpsm2	krt19	meox2	tll1
gsc				rspo2			smad1-a				frs2			ralb		MGC68455	sec62								notch1		fzd7	fzd7		myc-b		prdx5	fkbp10	serpinh1		fzd3	tll1	wdr16	fam70a	elovl5	rabgef1	ptger3	ehd4	cyp39a1	tm9sf1	c6orf35	fgf8	ubxn7	otx2
				sfrp1			smad1-b				fgf20			rasgrp2-b		mix1-a	syap1								dlc		fzd7	fzd7		tfap2a-a		rarg	fkbp11	sfrp1		bat4	pfn2	nr5a1	itgb1bp2	phf17	rbbp8	figf	nipa1	pold1	uhrf1	wnt11	dhcr7	traf4	krt8
				sfrp2							mapk12			ras		nodal1	tmem110.2								jag1		fzd7	fzd7		tfap2a		rassf7	fkbp9	siah1		abcf2	t	ift74	fbxl3	siah2	efha1	rapsn	c14orf166	kctd3	rtkn2	galm	ebag9	dnali1	hmgb2
				smarcd1							fgfr3-a			rala		nodal2	zpd								srrt		gbx2.2	gbx2.2				rax-b	fndc3a.2	slc16a1		ddx54	tbrg4	kctd15	scly	casp9	lman1	cc2d1b	stat1	nphp1	sox3	kiaa1609	dvl3	rock2	ilf2
				tcf7l1							fgfr3-b			spry2		rad51l3	arl8b								srrt-a		gjb6	hells				rdh10-a	foxd4l1.1-a	smyd2		pwp2	dhx9	foxj1	chst10	acsf3	nup160	dhrsx	tnf	ppil6	epcam	fancl	brp44l	c6orf125	ssr2
				tle4							fgf3			spry1-a		rilp	LOC100036954								rbpj		gpc4	hells				rrm1	fstl1	tnni1.2		timp3	otx2	chrna5	cox6c.2	ttll7	ism1	spryd3	nck2	nadk.1	lfng	zfyve27	tp53	chrna1	nucks1
				wnt3a							flrt3-a			spry1b		nodal3	LOC398092								shh		haus8	hoxa1				rrm2.2	glt8d1	tnnt3		fbln1	gmnn	tekt4	eef1a2	cobl	mcm10	tcf21	phlda1	atf6	enpp6	tmem5	pfkfb1	unc45b	plin2
				wnt8a							flrt3-b			frs2		epha4	LOC495442								Gli2		hells	hoxa7				rrp1b	gorasp2	unc45b		slc35b2	ccna2	spag6	spon2	kcnq1	rad51l3	fmo5	dph2	cerk	ankrd11	nek3	tcf7l1	lpar2	fgfr1
				wnt8b							grb2-a			fgf20		fkh1-A	mastl								gli3		hells	hoxc6				six3	gpkow			coq7	twsg1	ctse	cdk5rap1	gstz1	hmmr	kiaa1609	gla	paqr6	eomes	wif1	dhx32	znhit2	ddit4
				csnk1a1-a							grb2-b			mapk12		foxa4	MGC115550								ptch1		hes3.3	ilf3				skp2	gpr107			c3	spint2	pde5a	pea15	rrn3	uba1	uhrf2	cnpy2	ldlr	kiaa0649	src	gadd45g	sytl1	nkx2-5
				csnk1a1-b							rac1a			spred1		LOC443566	otx1								hoxa2-b		hes7.1	kdm3a				slc25a1	gyltl1b			spcs2	id2	cdc42ep2	psme1	slco2a1	spopl	arhgap30	rab32	nans	phax	fignl1	got2	eya1	eif4g2
				lef1-a							rac1b			plcg1		MGC115585	plin2								hoxa2-a		hoxa1	kitlg				slc5a8	hm13			kiaa1310	dact1	kifc3	sypl2	fam195a	ccna1	pdxdc1	kitlg	olfm3	acvr1b	usp38	mdh1	sh2d3c	grasp
				lef1-b							t			pkc-delta1		MGC81231	slc16a1								hoxb7-a		hoxa7	kremen2				slc9a3r1	hoxa1			sephs1	tpi1	mycn	slc38a5	fggy	rp2	serpinc1	rabgef1	mfsd2a	klhl21	mina	cops2	c3orf21	mthfd2
				szl-a										akt1		pcdh8.2	spry2								hoxb7-b		hoxc6	lbh				sox17a-a	igsf3			plk2	taldo1	gramd1c	cdk5	hand2	rev1	masp1	tjp3	itga2b	alad	tirap	rcl1	slc12a8	cirbp
				szl-b										gab1		tmem150b-b	wnt8a								hoxc8-a		hoxc6	LOC100158295				sox17a-b	itsn1			creb3	grasp	exoc8	mrpl41	rps15a	man1a2	cyp8b1	spsb3	sp8	pgm2l1	pskh1	ckb	fbxl14	ccdc50
				gsc										pik3c3		zic3	atp2a3								hoxc8-b		ilf3	LOC397989				tacc3	kctd12			rs1	cdc6	scly	ndufs5	trub2	arl3.1	hrg	kmo	rab3gap1	atxn2	hps3	ckap4	hsf1	twsg1
														pik3r2		aldh1a2	bves								lfng-a		kremen2	LOC398141				tf-b	kdelc2			ddx55	hnrnpa0	slc38a5	top3a	rock2	zp2	fam175a	sytl4	ccdc78	casp10	hgd	csnk2b	rassf8	cdc6
														akt2		brat	c7orf60								lfng-b		lbh	LOC398520				tll1	kdelr1			pcnp		angel2	grrp1	c6orf125	map3k7ip3	gtdc1	bat5	aifm3	cdc23	unc45b	tcf3	ipmk	hnrnpa0
														fgfr3-a		dkk1	dgat2								smo-a		lfng	LOC398539				tmcc1	kdelr3			hat1		sepsecs	mmp15	c2orf28	mina	tfe3	c19orf50	fam184a	gcc1	cacng1	tbrg4	slc36a4	c10orf119
														fgfr3-b		fzd7	dusp23								smo-b		lhx5	LOC398552				wdr4	krt8			hdac6		ptpn1	tecr	rhbdd1	sesn3	nab1	trdmt1	atp6v1b1	sec31b	tram2	dag1	stard4	lgals3
														flrt3-a		mixer	ebag9										lmo4.2-a	LOC443678				ythdf1	lepre1			rfx5		snx7	ywhag	nbn	rnft1	ptcd1	hgd	sox8	znf276	phc1	ctnnbl1	adck4
														flrt3-b		pdgfra	ednra										lmo4.2-b	meis3-b				znf143	LOC446286			stx6		snrnp25	chac2	dtwd2	crlf3	mrpl20	cdc42ep2	chmp5	parp11	nfxl1	magoh	wdr53
														grb2-a		rnd1	elovl1										LOC397703	MGC115642					LOC733391			pax6		casp10	dio3	otub2	slc15a2	gna14	c1galt1c1	nipa1	hnrnpa0	figf	cox5a	srf
														grb2-b		slc38a2	epb41l4a										LOC397863	MGC131108					loxl1			c19orf52		med26	senp8	nt5c3	pcsk7	cln3	agap1	c1galt1c1	hist1h2bj	adat2	ociad2	wdsub1
														rac1a		sox17a-a	evx1										LOC397948	MGC53542					lrrc58			exosc2		b3gnt5	agtpbp1	chst10	kif2a	parp11	slc2a10	c2orf28	not	plk4	fgfr1	f2r
														rac1b		xfd2'	gdf1										LOC594870	MGC53542					lrrc59			efna3		wif1	c14orf104	spon2	hook3	pex16	hisppd1	mettl11a	ubr7	prex1	dact1	ptch2
														pik3r1-a		cebpa	glt25d1a										MGC115642	MGC80142					MGC68663			unc50		tox2	pax3	cdc42ep3	c10orf76	rnf31	ing1	rhbdd1	zic1	c12orf66	nop58	tnip1
														pik3r1-b		sox17b.1-a	hps4										MGC131108	MGC83225					MGC80096			cab39		znf277	cbx8	arhgap29	ipo11	cdk8	kifc3	tbce	edil3	tead1	sfrs5	foxl2
														t			lnpep										MGC52598	mixer					MGC81908			c17orf48		cdc42ep3	stx18	spata18	yod1	slc34a2	mycn	hace1	pomgnt1	lrrc40	tpi1	dnajc10
																	LOC397693										MGC52909	msgn1					MGC82441			kalrn		c20orf112	gpx7	adhfe1	rbm15	snx33	tmem110.2	c5orf37	ints7	psat1	dvl2	zbtb45
																	LOC494638										MGC53682	mycl1-b					MGC84351			ass1		mast3	spop	isoc2	slc35b3	dio3	cyp1a1	acat2	sall1	mpp6	cycs	tll2
																	LOC496324										MGC68910	myf5					MGC84594			pak1		ddit3	slc25a44	cdk5rap1	ell	pla2g15	stx2	upp2	gpsm1	stambpl1	hnrnpa1	ptch1
																	MGC115216										MGC80142	myo1c					mmp14			dpp8		mmp3	coro2b	pea15	lars2	ccdc69	mrps11	rnmtl1	otub1	ncor2	nop56	rsph1
																	MGC53832										MGC81522	myo5a					mmp21			purb		pcid2	ccrn4l	btbd10	heatr2	txnrd2	zmat3	nbn	tgif2	mthfs	ssr2	znf238.2
																	MGC68700										MGC83225	n.a					mreg			gldc		tada2a	trim72	ttc7b	barhl2	clic5	ccdc18	reep4	mcm10	tdrd3	vdac2	igf2
																	MGC79091										MGC84100	otx2					myl9			ddx59		nmnat1	irf6	etfdh	atp11c	rassf6	stx11	cpped1	dck	rnf115	ppdpf	heatr6
																	MGC80135										mixer	rasl11b								zfyve1		pcsk5	kbtbd10	sall3	lrrcc1	rdh13	c12orf66	dhodh	npm2	gata3	ccdc50	maneal
																	MGC81642										mmp14	sfrp2								lrrn1		rad51	six1	atg5	emilin2	zfand2a	elovl2	zfyve21	odf2l	znf598	tardbp	met
																	MGC81667										msgn1	slbp								zic3		cdc7	slc25a4	ydjc	slc25a27	cyp2d6	cxorf57	mgat1	hal	ttc15	rpl37a	nos1
																	MGC84194										nodal	szl								gbx2.2		pdgfa	kiaa1524	pms1	kitlg	etv6	fstl3	fuca1	rhebl1	ttyh2	mthfd2	fbxl22
																	MGC85003										nog	szl								arpc5l		mak16	ahsa1	slc25a46	mark3	mrps11	esrra	cav2	znf668	tgfb1i1	rbm5	eomes
																	neu1										not	szl								ror2		gramd3	gyg2	tpd52l1	hoxa1	tmem60	c1qbp	katnb1	bard1	fhl3	sec61a1	nog
																	nodal5.2										otx2	tk2								rpl38		c3orf38	nploc4	snx30	msgn1	mtmr14	eaf1	fdx1	ccdc21	cdk10	p4hb	foxa1
																	nptn										pcdh8.2	tp53bp2								kiaa0195		myo1a	ndufs6	spsb1	slc16a12	lfng	atp2c2	agk	chaf1a	gnl3l	sfrs2	gata6
																	nr6-A										pkp3	traf4								ccdc6		arhgap29	slc25a22	pitpnb.2	apcdd1	rbpms	ambp	c3orf31	nmt1	akr1c1	eif4g2	pptc7
																	oaf										pnp	xarp								peli2		chst10	cryl1	setdb2	siae	rnaseh1	foxc1	fam3c	rad9a	tm7sf2	sfrs3	acvr2b
																	pkp3										rap2b	xfz8								foxn2		spata18	zdhhc2	c18orf55	eif4enif1	glcci1	trib1	rspry1	hist1h1t	slc26a4	hnrnpa2b1	enpp6
																	pld3										rasl11b	xpat-A								lmnb2		brms1	fam3a	smarcal1	nkain1	foxred1	pmm1	slc25a22	ddx31	arfrp1	eef2.1	znf276
																	Rho GTPase binding										rdd2	zeb2								mtmr4		birc7	rtn2	fto	dopey2	tdrd3	taok1	mrps30	sfrp2	tdp1	tpt1	znf598
																	xpat-A										sall1	zic3								numa1		ibtk	fbxo7	rnf216	ak7	ccs	rbbp8	cars2	fam53c	kcnq1	rps20	dis3
																	zic2										sdhb	znf131								ncapd3		apex2	dok4	sema3c	sort1	kiaa1737	klf10	h2afj	znf598	smad4	hnrpdl	p4ha2
																	chp										sfrp2	znf703-b								gas8		larp4	gabpa	grtp1	col9a2	asah1	trub2	fbxo46	trib1	rap1gds1	cirbp	ccnf
																	ddx25										slbp									ptprd		rpp38	ccdc3	hacl1	hoxb4	klraq1	spryd4	llgl1	saps1	rnf31	hnrnpa0	spty2d1
																											slc5a8									nrarp		prelid2	baz1b	gnal	fut6	qsox1	slc26a4	abcd3	cep152	cdc27	lgals3	hdac8
																											sox2									top2a		slc30a4	tk2	c19orf61	wdhd1	nif3l1	lrrc14	c14orf104	sdccag10	tmem110.2	c10orf119	incenp
																											sox9									ppp6c		dna2	mid1ip1	tiprl	kiaa0090	lysmd1	arfrp1	dtwd2	exd2	fah		uroc1
																											spry2									akirin1		pot1	gpr146	abhd11	e2f7	runx1	ap1m2	tmem209	otud6b	hisppd1		gpx7
																											syntenin									btg2		lass5	ctbp1	cog7	rcn1	adam9	c2orf28	slc27a6	akr1c1	boc		c15orf29
																											szl									c19orf47		gde1	pigc	dnlz	itpr1	b4galt4	psmb8	casp7	baz1b	sfxn3		mbtps1
																											szl									glud1		gpr157	cyp2d6	rps6ka1	gmeb2	mapk15	hspc159	c20orf11	med16	snx31		pag1
																											szl									pfkfb1		c2orf44	nomo3	alg3	dhx29	zdhhc20	atp6v0d2	otub2	pard3	cxorf57		tmem115
																											tbx3									mrpl21		pik3r1	serpinb1	slc41a3.2	hps3	pid1	atg5	mthfs	nfatc3	thumpd2		rnd3
																											tcf7l1									arl10		ccdc99	prkacb	dio3	rfng	mfsd10	ctps	psme1	myf5	itgb1bp2		rab13
																											tmpo									c3orf19		ccnd2	ube2r2	dcun1d1.2	ccdc89	scnm1	taok3	tmem199	c14orf135	tubb3		tchp
																											tp53bp2									gltpd1		znf652	flcn	pus3	lmbrd2	glce	parg	snx5	dis3	josd1		oxnad1
																											ventx3.2									rae1		lrrc40	hsp90aa1.1	c21orf70	gxylt2	c14orf102	hexdc	dnase1l3	fam175a	atxn3		kdelr3
																											wnt3a									gtf2e1		ypel1	rnaset2	snap47	hsd17b14	mal2	frzb	tfap2c	plin3	slc46a1		loxl1
																											xarp									alkbh6		cat	ppt2	ccdc94	khk	tmem82	mff	kif11	hcfc1	eepd1		dnase2
																											xbr-1b									prpf31		c12orf48	tmem93	pla2g15	slc25a36	sirt2	fibp	mcm5	rtn4ip1	tom1		coasy
																											xfz8									clasp1		sgms1	ptp4a3	ccdc69	tnpo1	ptpn2	snapin	rcbtb1	eif4enif1	ccdc99		src
																											zeb2									fundc1		braf	rab5c	txnrd2	ahsg	prtfdc1	irak2	nr3c2	nsmce1	dusp23		nr1i2
																											zic1									ctnnal1		c4orf29	zeb1	trim72	cdx2	zbtb12	cdc27	fbxo8	igsf3	kcnk1		mybl2
																											zic1									c9orf80		ccdc41	tubb6	egfl7	ptafr	ankra2	riok1	tgds	nek8	c14orf102		rbm24
																											zic2-b									ptplb		adhfe1	ndufs4	tbx20	akr1c1	mastl	abhd14b	wdr34	c3orf31	orc2l		ptp4a3
																											zic2-b									rer1		phlda1	tmem53	fbxo3	wdtc1	eif2ak2	c3orf58	glmn	cdc27	c19orf2		c7orf60
																											zic3									tmem66		rchy1	bnip3l	psme2	nit1	b9d2	fam53c	tirap	adar	trib1		tyrp1
																											znf131									osr1		ccdc104	tmem199	xrcc1	zbtb34	rnls	rbl1	nek7	tmem110.2	cited2		trip13
																																				c15orf63		nomo3	stam	mef2a	fem1c	lox	dlx5	sh3gl3	ppie	mal2		frat1
																																				tmed5		c19orf61	mrpl43	pip5k1b	slc9a1	trim72	mrpl48	nufip2	rnf113a	was		mylip
																																				rg9mtd2		znf668	mylpf	ephx2	slc38a10	cybb	snx31	ercc4	cks2	bcar1		anln
																																				mmadhc		tiprl	mef2c	tmem47	gbe1	csrp1	slc25a32	xrcc4	foxh1	clp1		nme5
																																				slc2a1		ubtd2	vps25	plat	kcp	tmem135	mettl11a	pppde2	uso1	gtf3c6		trdmt1
																																				chmp2b		gclc	npl	ube2cbp	exog	lcp1	myo1c	dguok	parp1	c3orf64		ccdc18
																																				psmd3		fbxo38	etv6	dnajb5	lhx3	cyba	mrpl11	frs3	top1.1	ergic3		mrpl23
																																				mlf2		abhd13	tpmt	pi4k2a	meox2	fry	bace2	maff	prc1	zswim1		sord
																																				mcoln1		zbtb9	sh3bp5l	gata5	fgf20	ate1	rhbdd1	nt5c3	ddx24	prpf4b		b3gnt2
																																				elavl1		abhd11	fitm2	mccc1	llgl1	bscl2	tbce	tead4	irg1	fam3c		lipt1
																																				dnajc17		cog7	dedd2	foxo3	abcd3	med16	tom1	slc3a1	vac14	prkca		dhdds
																																				zmym4		cbx8	c19orf61	senp6	snrnp25	mafb	kiaa1737	atp1b2	p4ha2	myo19		fam107b
																																				strbp		sox1	carhsp1	fgf8	med26	wnt5b	rnf14	slc1a3	tmem47	psmb8		depdc7
																																				rag1ap1		rab19	dhrs7b	dhtkd1	wif1	slc35c2	abcf1	c14orf166	inf2	lhx5		tarbp2
																																				lsm7		arhgap18	fam108a2	keap1	tox2	fbxo3	tor1b	stat1	rad51l3	atg4d		adrb2
																																				c4orf41		znf507	stk38	tmem209	pcid2	mef2a	kcnk1	elovl2	gata4	ddx10		mesdc2
																																				csrp2		rnf115	ndel1	ctbp1	tada2a	pip5k1b	pip5k1b	atp2c2	fam108b1	aktip		tmem11
																																				nop14		mecp2	rnf114	csnk1d	nmnat1	ephx2	apcdd1	ublcp1	sec16a	gstz1		rngtt
																																				sssca1		pus7l	gsr	klhl13	pcsk5	tmem47	ydjc	sdsl	fbxo7	pnpla3		akr1a1
																																				gtf2e2		ebf3	aldh18a1	tcta	rad51	plat	wrb	tmem120a	c18orf25	mta1		acaa1
																																				polr2g		efhd2	ppp1r1a	fam43a	cdc7	ywhag	nme4	h2afy	gjb6	vps37a		syap1
																																				c4orf43		foxg1	acads	park7	pdgfa	mfn2	hace1	pltp	alpl	trim72		ccnt2
																																				psmb7		rab33a	rpa3	lsm14b	mak16	cxcl12	ppard	ccdc93	tiprl	hexdc		shkbp1
																																				cept1		dmrta2	emp1	dnajb11	tm9sf1	hbp1	tgs1	b4galnt1	top3a	lect1		tgif1
																																				arrdc3		vamp7	syngr1	senp1	fam53c	tbc1d16	parp3	dnttip1	ddx52	hyi		tpte2
																																				ubl5		calb1	pex11b	raver1	agbl5	epas1	stoml1	slc40a1	smap1	dym		sap30
																																				glod4		mnt	wdr13	acot12	nek4	flcn	sdccag10	usp20	pigc	six1		znf410
																																				ikbkb		foxo1	cecr5	rassf5	cntfr	dedd2	ublcp1	elmo1	ddx10	mfsd2a		c3orf64
																																				wdr74		sp5	slc25a29	cox6c.2	fam46b	lnpep	efha1	ubox5	ccnf	nell2		cndp1
																																				kpna3		cplx2	pcf11	eef1a2	dsc3	sostdc1	gramd1c	ubxn6	ddx27	guk1		arsh
																																				rbm7		slc7a4	adrb2	ndufs6	rics	hspa14	rchy1	tmem49	alg6	abcf1		edc3
																																				prpf3		tbcel	phf1	tk2	trabd	qpct	elovl5	c16orf35	pex16	dhdds		mre11a
																																				ythdf2		hmx3	tnnt3	surf2	gatsl1	ezr	akr1d1	etfdh	lrrc8e	upb1		taf1b
																																				cpsf7		tekt1	jkamp	scn4b	per1	ndfip2	dis3	tubb6	nek4	tor1b		dscr3
																																				map2k5		tekt2	mrpl17	gabarapl1	c6orf134	ttc38	mrpl23	lancl1	brd3	rbks		ventx2.1
																																				lpar4		rbl1	atp5j	ap2s1	mthfsd	alg5	fam43a	rtn1	arhgap10	rpe		ergic1
																																				copg2		grhl3	pi4k2a	hspc159	ccnyl1	wipi1	asah1	pisd	sall4	mrpl48		slc35f2
																																				hiat1		gpr143	pold2	hexdc	c3orf39	zfpl1	glt1d1	phgdh	exosc9	c9orf72		kcnip4
																																				c20orf30		c1orf107	dhx33	c3orf58	c1orf27	rnf14	klraq1	mcfd2	kif20a	c11orf54		best2
																																				dhx15		pkp3	josd2	mgat4b	dnajc28	arntl	mafb	pfkp	ryk	sypl2		ngly1
																																				ostf1		itln1	btbd10	ern2	ncoa3	ca6	cldn12	pde4b	dzip1	rnls		shc1
																																				nop16		srd5a3	pepd	dpp9	ubtd2	il1b	man2a2	ctsz	cyyr1	psme1		e2f1
																																				psmg1		trnt1	ttc7b	pard6b	gclc	papss2	spc25	vps37a	kif23	angel2		tsen2
																																				uchl5		mgst1	st3gal3	inpp1	fbxo38	scin	klc1	camk2d	mrpl1	sec22a		sema4c
																																				esrp1		chek2	osgep	ccdc138	abhd13	was	tmem60	cldn5	wipf2	c7orf26		acad8
																																				snx3		zic5	abtb1	usp20	zbtb9	zbtb48	tmem205	ttc33	med26	cwf19l2		zfp161
																																				tmem85		c4orf47	rab24	gmds	tjp3	acy1.1	itgb3	nrp1	erh	trim29		nudcd3
																																				dpm1		atp6v0d2	plekhb2	tmem49	irf5	haghl	ercc8	dok4	abcf1	n4bp1		tctex1d1
																																				plxna1		abhd14b	fbxo3	jak2	cenpl	rasgrp1	dnlz	rpe65	strn3	eef1a2		mpp5
																																				ugdh		insig2	rbms1	ssbp2	bnipl	sfxn3	mgat4b	slc46a1	supt7l	rchy1		sult1e1
																																				gpr107		egfl7	nucb2	ndrg3	uhrf1	cnp	c5orf37	nudt16	prkcd	agtpbp1		pola1
																																				pip5k1a		hvcn1	csnk1d	lgtn	cdc23	rps6ka3	exoc8	ada	hmmr	alpl		ube2cbp
																																				cpsf3		fgb	ccbl1	wars	rspo2	c5orf4	vrk1	itfg3	smc6	mthfsd		dnajb5
																																				rpn1		tmem206	nfix	scn3b	mocs3	tmem5	pgm3	neu1	c16orf53	rab3d		chek1
																																				c10orf58		hoxa2	mfn2	efhc1	c17orf63	mmp24	fbxl20	fah	smad6	gfod2		lig1
																																				cdc40		efnb1	gca	gpaa1	znf217	c15orf41	me3	eepd1	sec22a	ppard		grpel2
																																				zc3h10		capn11	tmem150a	rbp1	hira	elk3	sord	adipor2	fam175b	asah1		pbk
																																				pygl		cfi	mfge8	chn1	lpcat3	rbks	uso1	aplp1	fbxo5	pabpc4		haus6
																																				utp15		tbx20	mtmr9	ppp2r2b	rcor1	rab3d	pms1	col6a1	egln1	stx10		kiaa1841
																																				ero1lb		ptgs2	unc50	tp53rk	shcbp1	scnn1a	mrps24	galntl1	cwf19l2	ift52		chaf1b
																																				ppat		myb	hsf2	sptlc1	pole4	dnm1l	c5orf30	ppme1	n4bp1	larp1b		xrcc6bp1
																																				sav1		cand1	orai2	bves	zar1	ambp	chmp7	tgfb1i1	csnk1g2	pank3		ptges
																																				eif2b2		ubxn7	tmem127	cbx4	tcf7	trib1	acat2	ephx1	ldlrap1	ccdc58		lin9
																																				arhgap21		traf4	leprot	tm2d2	blm	abcf1	dcun1d1.2	nlgn3	lrrfip2	ppt2		hbox10
																																				sfrs13b		dnali1	herc4	mcat	leprotl1	xpa	ern2	dync1li2	gfpt1	tifa		ccdc9
																																				cnot8		unc45b	add1	rab23	kcnk5	casp2	dpp9	prpsap1	asah1	blnk		fignl1
																																				rbm4b		lpar2	ndufb3	cxorf39	fam175a	mppe1	ccdc104	lcat	dullard	ptpn12		cited2
																																				rnmt		znhit2	gatm	vps26b	gtdc1	pparg	cand1	nek4	gnas	thbs4		st14
																																				sppl3		sytl1	optn	hmg20b	tfe3	tmf1	b3gnt2	cntfr	ccnb1	arhgap1		slc6a14.2
																																				jagn1		eya1	ccdc90a	ccnc	nab1	c21orf91	mrps12	prph	dao	klhdc2		prkg2
																																				wdr77		pi4k2a	akt1s1	det1	irf6	rhpn2	cox18	pea15	rnd1	kalrn		alkbh4
																																				tomm40		gata5	atg16l1	c14orf179	grhl3	nipal3	c18orf8	tpd52l1	c9orf41	fam43a		tecpr2
																																				pcm1		tbce	tulp3	slc25a4	gpr143	tm7sf2	sdsl	gabarapl1	armc1	pgm3		c3orf17
																																				cwc15		rnmtl1	ckm	ndufs4	c1orf107	tbx3	tmem120a	ndrg3	tyk2	upp2		atpbd4
																																				kdm2b		reep4	ube3a	mgst3	pkp3	polr1b	gatsl3	lgtn	ermp1	usp5		dtwd1
																																				eftud2		zfyve21	fbxo33	c3orf75	itln1	kng1	h2afy	wars	lyar	rabggta		kif13b
																																				derl1		psme1	elmo1	dkk3	insig2	katnb1	dnpep	scn3b	tmem192	ccrn4l		caprin2
																																				cxadr		c14orf104	orc4l	fuca1	saps1	cpped1	siae	efhc1	golga2	agpat1		itga5
																																				zcchc10		tmem209	lnpep	slc15a4	dyx1c1	dhodh	gnb3	gpaa1	tspo	c7orf60		asb7
																																				acvr1		slc27a6	klhl13	irs1	stoml1	fdx1	p4ha2	fam70a	ccne2	gng7		tmem171
																																				gmeb1		casp7	flii	c5orf37	nsmce1	fuca1	lipt1	tecr	nog	tubgcp3		amdhd1
																																				ythdf3		c20orf11	aen	c3orf31	n4bp1	agk	fam76b	dhrs7b	vps37a	gipc1		cenpn
																																				poldip3		mthfs	keap1	fam3c	hao2	c5orf37	ndor1	c12orf4	ncaph	rnf149		mrps25
																																				slc35b1		tmem199	rpp40	rspry1	dyrk3	c3orf31	dcbld1	fez1	insm1	slc25a44		plod1
																																				idh3a		snx5	dnajc17	c7orf26	wdr76	fam3c	grhl3	tac1	carm1	fbxo46		rybp
																																				lrrc58		dnase1l3	padi2	sycp2l	mogat1	rspry1	mtmr14	snca	bnip3l	atp6ap2		topbp1
																																				pomp		tfap2c	cln3	clic5	kcnq1	slc25a22	tbc1d16	cugbp2	c18orf8	slc25a4		dhfr
																																				sema6d		kif11	mrpl16	rassf6	ap1m2	cav2	epb41l5	fam171a2	h1foo	kbtbd10		thbs4
																																				gtf2f2.2		mcm5	dnajb9	rdh13	phox2b	mgat1	prkcd	stxbp1	e2f8	ppp3cb		pitx2
																																				adam10		nudt19	fam50a	pex11b	mett11d1	mrps30	bcam	dner	mex3c	insig2		lyrm1
																																				apool		tead4	usf2	flii	fbxw2	acat2	lman1	c4orf31	nuf2	zer1		parp3
																																				trip12		tnfaip8	epha2	dnajb9	adck1	cars2	spon2	klhdc8a	zp4	man1b1		tnip2
																																				pecr		oaf	cdk2	bpgm	naalad2	mettl11a	cox6c.2	hmgcs1	taf9	ube3c		kcnk6
																																				vps29		nanp	surf2	slc25a30	sh3gl1	h2afj	scly	cyb5r2	fzd3	rit1		socs3
																																				prpf6		hmha1	sec11a	irs4	ube2d4	fbxo46	sostdc1	scg2	cenpl	nrp1		fam82b
																																				hdac1		gpsm2	mars	arrdc2	stard10	orc4l	cdk5rap1	dtnbp1	polr2i	tbc1d16		phc1
																																				acsbg2		c12orf4	ireb2	clpx	kiaa1324l	clcn7	mrpl21	ss18l1	rnmtl1	spon2		kbtbd10
																																				farsa		atp1b2	fnbp1	cybb	fry	dapk3	dhdds	def8	tmcc1	loh12cr1		six1
																																				c20orf43		slc1a3	snx5	csrp1	ate1	pabpc4	rpe	abca4	psme1	sdsl		cacng1
																																				rqcd1		limk2	nrip1	ccdc61	bscl2	fitm2	c1orf172	nrsn1	ftsjd2	hmgcs1		has2
																																				ica1		taok1	scn4b	atg4d	odf2l	nfkb2	park7	shank2	acbd5	psme2		osr2
																																				c9orf78		hspc159	cxcr7	mrps16	ccnb1	exoc5	c11orf54	lim2	sestd1	qtrtd1		vrk2
																																				ywhab		ctps	myl1	mxd3	aldh1l1	katna1	fen1	tfap2b	ssbp2	wdr36		klhl21
																																				creb1		hexdc	capns1	ccdc93	bat5	tubb6	nsdhl	c9orf98	endog	znf750		alad
																																				psmb2		c3orf58	bpgm	bet1l	bcar1	uevld	coq5	nrcam	rrs1	wdr37		alpl
																																				psmd6		ublcp1	gga1	wsb2	cdx4	ube2z	ptcd1	atp1a3	map3k7ip1	znf277		strn3
																																				sgta		mgat4b	ubxn6	stk19	c15orf41	gnaq	sypl2	tmem45b	mrpl21	appl1		fam175b
																																				api5		vrk1	ctsz	acox2	sec31b	lancl1	ascc2	c1qtnf4	hist1h2bo	fut8		foxo3
																																				e4f1		pgm3	sike1	inf2	fam168a	rtn1	psme2	tssc1	tmem184b	c19orf52		ptgr1
																																				rps6kb1		ern2	fam98a	pfkp	flad1	cbr1	zdhhc16	cry2	arrdc1	tgif1		me2
																																				aph1a		dpp9	rps15a	pde4b	trdmt1	appl2	rbm12b	nfxl1	otx1	armc8		ppp1r15b
																																				cpsf6		cox6c.2	actc1	chst12	dis3	stk19	slc38a5	flrt1	ube2c	gldc		clk1
																																				cops8.2		c1orf172	snip1	fbxo31	ventx2.1	chst12	cdk5	mfn1	gatm	prmt10		foxc1
																																				ccar1		pard6b	gpn2	zer1	ergic1	ankrd13c	angel2	usp46	rnf34	supt3h		fbxl20
																																				ddx19b		suv420h1	blvrb	ywhag	slc35f2	pan3	bmi1	fads2	bat4	mos		bcam
																																				elf2		c5orf44	dctn5	emp1	kcnip4	sdr16c5	sh3rf1	tspan5	trib2	rtn2		nsdhl
																																				chmp4b		pltp	smcr7	wdr13	best2	stxbp6	tnip2	crmp1	rbmx	gpx7		phactr1
																																				tmem147		smarcc2	nfkb2	cecr5	ngly1	pisd	hoxb4	cadm4	paf1	insig1		gosr2
																																				dnajb12		b4galnt1	vps37b	abtb1	shc1	adamts1	sec22a	pla2g6	commd1	ptp4a3		fst
																																				usp25		inpp1	slc38a2	mfn2	e2f1	gzf1	exd2	dscam	thap1	oscp1		cndp2
																																				gosr1		ccdc138	glrx5	cxcl12	tsen2	rfx2	egln1	nphp3	imp4	c11orf10		ccni
																																				hsd17b10		c20orf4	atp1a2	nr2f2	sema4c	ppp1r14c	uevld	rufy3	ik	tecr		c11orf2
																																				copa		rabl5	ube2v2	hbp1	acad8	pias4	fam107b	chrnb2	eny2	acot2		sfrp1
																																				wdr61		ndel1	pdhx	nipsnap3a	zfp161	epn2	rabac1	elmod1	fam171a1	agbl5		mrpl24
																																				rbm16		aldh18a1	arpc5l	isl1	ubxn7	lsr.1	gramd4	ophn1	anxa3	pla2g15		ptcd3
																																				sec62		slc40a1	socs3	rara	traf4	kiaa0174	trim29	gdi2	foxo3	slc35b2		scpep1
																																				gnai1		usp20	rgs4	tbc1d16	dnali1	phgdh	agtpbp1	lhx8	edem1	mrpl20		rptor
																																				cdk2ap1		mrpl17	col1a2	epas1	phc1	mcfd2	znf384	mapre3	osgep	rab5c		rasgef1a
																																				irf2bp2		gmds	nr4a1	adprh	rps15a	seh1l	nudt12	fhl3	acp2	cpe		hunk
																																				tmem33		epb41l4a	cdc42ep4	serpinf1	foxd3	pi4ka	ypel2	abhd6	cdca8	sytl2		palm
																																				prkcsh		elmo1	aldh1a1	rnf157	ggt1	slc25a30	depdc7	dpp10	rnf168	c12orf5		pygm
																																				ext1		ubox5	impa1	ptp4a3	gnpda1	psmb3	pard6b	slc6a13	fnbp1l	mafb		pigs
																																				mapk1		tmem49	bsdc1	ap3s2	cog6	atp6v0d1	hspa14	scd	tmf1	katna1		mef2d
																																				abi1		vps37b	ppm1l	pag1	phf6	hebp1	tbx3	lhx9	zdhhc6	smarcal1		tars
																																				eif3j		znf143	c1orf128	adrb2	ddx27	ppm1b	pabpc4	tmem163	eif4ebp2	fzd8		alg2
																																				sf3a1		ppp3ca	trmt6	p4ha2	ints7	ube2h	gpx7	ptprz1	plrg1	stam2		hsp90aa1.1
																																				zranb2		jak2	cxcl12	myo1c	sall1	pex11b	ddx27	odf3	casp6	eny2		cnrip1
																																				siah1		cab39l	ube2f	slc24a6	magt1	flii	taf4	nefl	sin3b	anxa3		cpe
																																				cd82		slc1a5	stx5	lonp2	vps72	bpgm	ropn1l	gnb3	snx2	mex3b		lpin2
																																				hmgcr		fam108b1	cox17	bnip3l	slc30a3	irs4	olfm4	cxcr7	snupn	esd		fam102a
																																				nek2		pigc	tbk1	tax1bp1	c21orf91	ccdc93	suv420h1	gpr146	smarcc1	tmem120a		kcnab2
																																				ptp4a2		ssbp2	etfdh	rab3d	rhpn2	bet1l	bcl11a	rspo2	spty2d1	ppox		ppard
																																				psmc4		surf2	smtn	foxc1	c14orf104	wsb2	tbl3	prim1	rab8b	osgep		mccc1
																																				ptp4a1		ap2s1	tmem11	me2	ppfibp1	acox2	arl10	fhit	hdac8	nfe2l1		mul1
																																				rab2b		prph	rbm42	pigs	rhbdd1	inf2	fktn	trim3	upk1b	me3		ggt1
																																				hsbp1		gabarapl1	arrdc3	mef2d	dtwd2	pfkp	ano1	sc5dl	tcp1	dnpep		traf6
																																				c7orf20		ndrg3	gpr172b	taf4	fbxo33	pde4b	elp3	paqr4	ccnb2	c3orf19		retsat
																																				fip1l1		lgtn	cxadr	arhgdia	tnfaip8	fbxo31	tarbp2	xiap	ptgr1	acp2		stk25
																																				abcf3		wars	rpl22l1	eps15l1	tspan17	zer1	ppie	cd276	rpia	atg4b		itgb1bp2
																																				lsm4		scn3b	mfsd5	ctps2	c3orf37	gca	scnn1a	sec31b	gpr172b	cpvl		zeb1
																																				nosip		efhc1	c11orf58	ttc15	tp53i11	ctsz	gmppa	fam168a	snrpa1	arvcf		arl4c
																																				kpna2		gpaa1	rptor	hmg20a	rnf145	grsf1	nup107	flad1	mtmr9	nae1		grb2
																																				ube2l3		fam70a	rab13	itpkc	slc44a1	tmem205	c5orf44	ddx10	bet1	lactb2		upb1
																																				ube2i		dhrs7b	slc27a6	akap2	jkamp	gstk1	dnajc3	shh	shpk	fdx1		foxd3
																																				xrn2		fez1	dcxr	snx9	cab39l	dnttip1	c19orf28	slc45a2	sox13	bet1l		ddi1
																																				pdia6		tac1	rbm24	rit1	slc1a5	nfe2l2	sh3bp4	mib2	sec23ip	tmem181		senp6
																																				dazap1		snca	nr2f2	slc38a9	taok1	vps37a	ccrn4l	tatdn1	phgdh	nup155		itpkc
																																				cdc37		cugbp2	psmb3	dkk1	c1orf172	camk2d	nudt19	grlf1	cars	evl		akap2
																																				scyl1		fam171a2	atp2a2	xpnpep3	smarcc2	cldn5	pltp	wdr78	hscb	fam58a		psph
																																				ctsd		stxbp1	c3orf26	foxh1	ubox5	ttc33	dennd2d	irak2	fbxo42	gnpda1		sh3yl1
																																				bap1		dner	higd2a	tpte2	fam108b1	nrp1	upp2	slmo2	cldn6.2	sirt7		slc1a4
																																				kdelr1		c4orf31	ccdc28b	znf384	nlk	rab40b	katna1	rufy1	dnttip1	arih2		aadacl4
																																				thrap3		klhdc8a	impad1	shroom3	pard6g	chac2	slc25a46	ppfibp1	acbd3	mms19		pelp1
																																				edc4		hmgcs1	chid1	fam82b	usp3	dok4	mccc1	dtd1	gapvd1	pigs		osbpl11
																																				txnl1		cyb5r2	ggps1	itgb1bp2	tada1	mrpl43	nae1	keap1	habp4	plrg1		icmt
																																				bat1		scg2	tfcp2	arpc5l	c14orf126	pcf11	whsc2	styx	c2orf76	ddit3		boc
																																				dgcr8		dtnbp1	akr7a2	stk25	cdk10	optn	dtx2	tubgcp3	phf5a	rab40b		flrt3
																																				dync1li1		ss18l1	prdx5	ror2	prdm2	ubxn6	zdhhc6	tollip	lsm14b	mrpl43		mboat1
																																				fbxo11		def8	ankrd13c	kiaa0195	clp1	bsdc1	cybb	taok3	pan3	cirh1a		nbr1
																																				adh5p4		abca4	gpr137b	bmp2	yeats2	dcxr	ccdc93	parg	bod1	fgf20		fgfrl1
																																				rab11a		nrsn1	cdk5rap3	epha2	zc3h7a	ssbp1	prdx4	slc25a32	sf3b1	slc38a5		slit2
																																				rbm8a		shank2	dnajc19	fnbp1	b4galt5	renbp	smarcc2	fam43a	klhl13	ada		hic2
																																				aldob		lim2	nedd4l	gga1	nubp2	snapin	impa2	cldn12	ccdc49	bcl6		rtkn2
																																				smpd4		tfap2b	b3gnt5	fbxo45	usp38	sdsl	capn2.2	klc1	wibg	ndel1		gcc1
																																				ppp2ca		c9orf98	atf1	slc20a2	ydjc	bcl11a	phactr1	park7	brd4	ctgf		ubr7
																																				loc646644		nrcam	mrps34	ensa	snx30	elp3	c15orf29	c11orf54	nae1	dhps		ints7
																																				arhgdig		atp1a3	phf13	tbc1d23	spsb1	dnajc3	tsen54	gramd4	phf13	acads		sall1
																																				akirin2		tmem45b	map2k5	mtmr10	pitpnb.2	plrg1	csrp1	gmppa	surf2	dhrs7b		ddx27
																																				copb2		nlk	lmo7	cttn	fam124a	ptpn3	plrg1	mest	pdcd11	pggt1b		mex3c
																																				nhp2l1		pard6g	pon1	wdr45	tyms	hccs	gphn	ctbp1	mmadhc	emp1		tsr1
																																				cct7		usp3	hbp1	rbpms2	fgf3	spast	slc25a4	srebf2	slc34a2	orai2		utp6
																																				zfand5		tada1	coq9	harbi1	tiprl	rpe65	rbmx2	zcchc4	rbmx2	vps72		orc3l
																																				cnn1		c14orf126	mcts1	adal	dscc1	slc46a1	qpct	qdpr	lrwd1	tmem127		tnpo3
																																				pafah1b1		cdk10	cab39l	hibch	usp4	nudt16	dusp22	arf3	incenp	lrig3		foxp4
																																				aplp2		prdm2	mospd1	prrg1	fam151b	ada	bmp1	wbp2	dbf4	nsdhl		syn2
																																				ghitm		clp1	ssbp1	aadat	katnb1	itfg3	c3orf19	c19orf62	med4	uevld		cinp
																																				cdc34		yeats2	znrf1	tsnax	nme4	tmem144	gosr2	fahd2a	slc35a3	dcaf6		pdia4
																																				slc16a1		zc3h7a	robld3	prkar1a	gnb3	tbc1d24.1	eps8l3	rgp1	dgcr2	snx7		fkbp9
																																				nfkbia		b4galt5	slc1a5	adarb1	prim1	cuedc1	qsox1	anapc7	dcaf10	rabggtb		mcm6.2
																																				snrpb		nubp2	nt5dc3	cetn1	ccnj	ift57	bet1l	fam107a	etfdh	pds5b		fnbp4
																																				ube2b		rbp1	stambp	heca	pole2	hdhd1a	adprh	cyb5b	upk1a	slc25a29		prdm1
																																				itgb1bp3		chn1	nr1d1	ap1s2	tpst2	pelo	agpat4	camk1	usp22	gpd1l		znf384
																																				mobkl3		ppp2r2b	c20orf30	gng7	pdik1l	man1b1	rnmtl1	st3gal4	nudt5	tnnt3		tbl3
																																				med25		snx1	stk25	rangap1	skp2	sec11c	arhgdia	gsr	c1orf21	mid1ip1		usp16
																																				pmpca		c14orf109	renbp	kiaa0368	ptcd1	glt1d1	usp47	tbc1d23	abcf2	bat4		arg1
																																				arf5		decr2	tmbim1	rabgap1l	mrpl20	tmem120a	commd5	bcap29	dnajc8	phf1		parp2
																																				ddx17		zswim1	c18orf19	stk11ip	gna14	dnpep	b4galnt1	eif4e3	pkmyt1	fam108a2		med24
																																				pa2g4		c7orf46	ndufb2	tsr1	eif2c4	epb41l5	pura	rfc5	me2	c14orf4		ruvbl1
																																				ppm1a		sel1l	rangrf	ruvbl1	hace1	ypel2	bcl2l2	ttc37	rer1	wsb2		ddx18
																																				pgrmc2		tp53rk	fbxo45	nfatc1	pus3	dusp22	endog	cars	rbm7	rpia		nfatc1
																																				psma5		sptlc1	tspan15	mef2c	tubb6	bmp1	gltpd1	ubqln2	gmfb	padi2		acot2
																																				myef2		ndufs6	snta1	ppp1r1a	ireb2	flvcr2	gnpda1	pih1d1	atg16l1	gtpbp2		smyd2
																																				tuba4a		tk2	mrpl12	ckm	sepsecs	glb1l	sepsecs	nucb2	u2af1	krt12		tnpo2
																																				uqcrfs1		bves	hcca2	c8g.2	znf277	mdm4	fam175b	bre	spats2	galk1		smad4
																																				dcaf7		cbx4	slc20a2	prdx2	gramd3	c16orf35	mest	add1	c3orf26	klhl20		magt1
																																				rnpep		tm2d2	idi2	aass	c3orf38	neu1	mbtps1	cnot7	cbx1	thg1l		vps72
																																				anxa11		mcat	uchl1	c2orf34	myo1a	fah	chst2	ndrg1	zranb1	prkacb		slc30a3
																																				rab18		rab23	c8g.2	ddx1	recql	eepd1	fst	fbxo33	arf6.2	grip2		trmt61a
																																				cdv3		cxorf39	prdx2	ostc	rnls	adipor2	znf750	mtmr10	msh6	prrc1		c10orf140
																																				sumo3		vps26b	ufd1l	btbd2	lox	aplp1	bcl6	fam50a	zmat2	btbd10		ptpn12
																																				nek9		hmg20b	dtymk	pdcd10	ttc25	col6a1	ctbp1	prmt5	zic2	plat		nr6a1
																																				cope		ccnc	serinc1	slc25a22	sdccag10	galntl1	inpp1	atf5.2	pds5a	coq7		capn8
																																				ppp2r2a		det1	tax1bp1	pdhx	sec22a	ppme1	mid1ip1	sike1	ccdc45	zeb1		tmem127
																																				eif4a2		c14orf179	pip4k2a	cav2	taz	tgfb1i1	srebf2	fam98a	sh3bgrl2	aldh4a1		dhtkd1
																																				npm1		cnot6l	c13orf15	anks3	atxn2	ephx1	ints2	cttn	rbm19	tbx1		tfdp2
																																				mmgt1		serpinb1	aass	dcaf12	dck	nlgn3	cyp2d6	abr	bckdk	gpaa1		med23
																																				ctnnb1		rab5c	nip7	nup85	pard3	dync1li2	zcchc4	c22orf13	mettl9	hibch		cass4
																																				azin1		npl	cul3	ikzf5	dullard	prpsap1	gjb6	amotl1	snrpd3	dnajc3		tada2b
																																				ctsa		thap7	psmd14	mgat1	tubb2b	lcat	c14orf133	impa1	nat12	porcn		zbtb33
																																				rad23b		aktip	acat1	fdx1	ctdspl	bdh2	rae1	ube2f	scfd1	c2orf76		fkbp11
																																				cd2bp2		tpst1	snx1	agk	rab11fip2	ecsit	nbn	tgfbr1	mkrn1	rab30		bmper
																																				arcn1		tm2d3	lars	mrps30	nfe2l1	pex1	nomo3	pam	mysm1	traf7		cyp26c1
																																				tubb		wdr8	ndufa8	nedd4l	mrps9	fam46a	hint2	c19orf63	pitrm1	ttc7b		uso1
																																				lypla2		dusp19	jund	hcca2	prpf4b	naif1	tfap2a	slc25a10	nufip1	elp3		gsc
																																				mgrn1		hpca	cox7b	dapk3	ckap5	loh12cr1	ptpn1	blmh	hsph1	gstk1		fgf3
																																				ube2a		rnf149	irf2	trappc9	prr12	iqcb1	dcaf6	nedd4l	epn2	eif4e		gpd1
																																				psmc2		smad9	gabarapl1	hsd17b4	usp1	c22orf25	cpeb1	znrf1	ctnna1	saps3		slc25a20.2
																																				gpnmb		ubr2	tcta	ggnbp2	uevld	cutc	alkbh6	golga5	znf143	ncald		lta4h
																																				ndfip1		bfar	fuca1	pabpc4	ube2z	ltbp1	gtf2e1	wdr45	stambp	frmd8		esyt2
																																				dlst		hus1	pias4	chuk	gnaq	tnks2	hint1	nt5dc3	zbtb44	tubb6		aloxe3
																																				rnf10		scap	c11orf2	stk39	nfatc3	lipa	reep4	tmbim1	rangrf	commd10		otub1
																																				stmn1		arfip1	slc25a12	tipin	trim72	c22orf9	qdpr	wasl	herc4	mylpf		ryk
																																				srp72		tom1l2	gdap2	arhgef12	pold2	tubgcp4	fam126a	slc20a2	tspan15	agk		dzip1
																																				eif3m		akap7	rhob	fahd2a	cbx5	nr3c1	pan3	tcta	asna1	smarcc2		mrpl1
																																				hcfc1		dhps	vps11	bcap29	nova2	ncor2	arf3	wfs1	plk1	serpinf1		smad6
																																				igsf3		mgll	klhdc3	ttc37	med16	bid	wbp2	rcan1	extl3	ccbl1		gnas
																																				top1.1		taf5l	cav2	atf5.2	sft2d2	ube3a	pwp1	clcn3	slc30a1	pdhx		bnip3l
																																				sec16a		gpr180	srpk1	commd10	stxbp3	serpinf1	wsb2	aftph	ppm1b	eif4ebp2		taf9
																																				ddx52		dym	utp15	pacsin2	rtn4ip1	klhdc2	prpf31	becn1	ddx54	rnf146		tmcc1
																																				brd3		atad1	prnp	sh3bp5l	ergic3	emp1	tdrd7	pccb	c1orf128	rnf5		sestd1
																																				rnd1		lsm1	mgst3	gca	hsd17b7	wdr13	c19orf62	agfg1	sp2	map3k7		map3k7ip1
																																				carm1		tdp1	grsf1	mrpl16	cdc37l1	cecr5	snapc1	coq6	ece1	rbmx2		paf1
																																				polr2i		nupl1	srfbp1	ctsz	ccnf	abtb1	ephx2	ethe1	pofut1	rab24		edem1
																																				rrs1		sh3gl2	asb13	c11orf58	nr1i2	nipsnap3a	gstk1	anxa7	cmbl	epb41l4a		mtmr9
																																				hist1h2bo		ttrap	snx12	psmb3	dhx33	adprh	enoph1	mkl1	fubp3	prdm2		shpk
																																				tmem184b		ndufa3	slc25a30	atf1	ddx10	rnf157	mapk12	gpx3	snrpb2	c7orf46		med4
																																				arrdc1		entpd4	sri	grsf1	mrpl23	phyh	bcat2	ppp1r11	rap1a	unc50		c1orf21
																																				trib2		psmg3	ccdc77	pisd	fam107b	col3a1	ccdc138	amfr	ube2v1	cdc42ep4		pkmyt1
																																				thap1		traip	supt16h	fkbp1b	depdc7	c16orf5	c20orf4	ensa	qdpr	fgf3		gmfb
																																				casp6		pak2	gpm6b	sod2	znf276	dcn	fahd2a	serinc3	gstt1	xpr1		c3orf26
																																				sin3b		ercc1	nmd3	idh3b	hdac8	ctgf	rgp1	fam171a1	cdc20	eprs		rbm19
																																				snupn		cyp4b1.2	nipsnap3a	cebpb	incenp	nfil3	selenbp1	gnpda2	usp44	snx2		asna1
																																				gpr172b		ugcg	nfil3	aldh2	nudcd3	bhmt	galk1	ppp5c	tsku	hectd3		sp2
																																				sox13		ccnt1	rcan1	mdh2	tctex1d1	otud6b	agbl5	c16orf53	b3gnt5	htra1		lztfl1
																																				sec23ip		jhdm1d	rab4b	tmem50a	tjp2	ccdc22	ostc	diablo	dhrs3	med27		agps
																																				acbd3		hddc2	taf6l	atp6v0d1	cep152	pmm1	tmem53	ctu1	akr7a2	zcchc4		fam20b
																																				phf5a		dnal1	c19orf56	gemin6	rab33b	dhx33	txndc15	cse1l	tex10	wdr13		rnf185
																																				brd4		hspb11	hmg20a	alcam	cmtm7	tjp2	cask	commd10	qrich1	upk1b		ube2k
																																				phf13		slc25a4	bhmt	fnta	mrpl15	cep152	mrpl20	chid1	atf1	dcaf10		kank1.2
																																				pdcd11		mgst3	lsp1	ccnl1	nrf1	rab33b	nipal3	vps18	hmgxb4	scamp3		rasl11b
																																				usp22		fam124a	aqp3	eif4ebp2	mrpl37	cmtm7	dnttip1	fuca2	uroc1	clcn7		tmem128
																																				atg16l1		c3orf75	apoo	erf	kbtbd10	mrpl15	anapc7	rbm42	rbpms2	osr1		ppap2a
																																				spats2		ndufs4	pisd	ikbkap	six1	nrf1	nif3l1	hey1	lztfl1	gemin8		shmt2
																																				cbx1		dkk3	ndufs3	atp6v1a	kiaa1524	mrpl37	fam107a	cyp4v2	fxc1	adrb2		sirt5
																																				zic2		gyg2	cyth1	spin1	cln3	josd2	rps6ka1	rnf139	c22orf13	traf6		ahcy
																																				sh3bgrl2		tifa	atp5h	gpn3	hunk	tnfaip1	zbtb5	dctn4	cbfb	sp2		dtx2
																																				mettl9		tyms	supt5h	hspe1	tmem185a	ccbl1	rnf20	med7	smc1a	ndst1		commd5
																																				nat12		ccdc19	ppp1r15b	slc25a25	mrpl1	eif2b1	irf5	c19orf6	atp6v0e1	rbm42		cask
																																				mkrn1		nme4	clcn3	tmem205	paf1	cxcr7	sft2d2	hcca2	zc4h2	timp2		dcaf13
																																				hsph1		gnb3	rrp1b	gstk1	slc35a1	lonp2	mylpf	trappc9	gtf2e2	abcf2		alg1
																																				ctnna1		dennd2d	cript	dnttip1	chst7	myo1c	rangap1	hsd17b4	rcn2	alg8		ndst1
																																				zbtb44		kiaa0649	vbp1	hebp1	pcgf2	slc24a6	foxo3	pacsin2	xpo1	flii		mtus1
																																				rangrf		c9orf41	cyp4v2	nfe2l2	kiaa1600	brd1	cpped1	kiaa1012	erf	prpf8		trmt2a
																																				extl3		prim1	grwd1	adamts1	ttyh3	gpr146	exoc5	auh	erlin2	hint2		camlg
																																				c1orf128		fhit	pex19	vps37a	c1orf43	usp47	slmo2	triobp	racgap1	nomo3		ppm1l
																																				pofut1		ccnj	spns1	ppm1b	fam82a2	znf592	pan2	arhgap1	pip4k2a	pi4k2a		ccdc109b
																																				cmbl		pole2	ube2k	camk2d	rhobtb1	habp4	mul1	gpx1	timm44	dnajc1		slc7a7
																																				fubp3		tpst2	vps28	cldn5	bcar3	soat2	tjp2	nfix	yeats4	rbm24		kpnb1
																																				snrpb2		pdik1l	rnmt	ttc33	c17orf49	psmb8	brcc3	mfge8	ptk2	rap1a		memo1
																																				usp44		skp2	dimt1l	nrp1	sirt7	gabpb1	ints8	rap1a	myh9	ezr		psmd14
																																				dhrs3		c7orf26	sesn2	gzf1	narg1	ap4m1	rab11fip5	thtpa	prpf3	pgd		pcyt2
																																				qrich1		sycp2l	atr	rfx2	mapk7	yipf4	flvcr2	gtpbp10	cul3	atg16l1		ppp1r13l
																																				hmgxb4		gabpa	atp5l	ppp1r14c	gfod2	stambp	cenpl	gnb4	eef1e1	rps17		copb1
																																				yeats4		polr2l	rasl11b	ube2h	lmbr1l	vill	clasp1	c5orf24	cdk2	me2		slc25a39
																																				eef1e1		pcca	dapk3	rab40b	psmb8	hmg20a	fnbp1l	ppp2r4	fkbp4	gmfb		c7orf42
																																				sumo1		kif20b	derl1	rad9a	parp11	fa2h	fundc1	ncald	vat1	sh3glb1		ubl7
																																				srp19		dcps	junb	pklr	pex16	snx9	cyb5b	sap30l	cox17	cldn6.2		pdcd4
																																				mxi1		pif1	c14orf147	nras	rnf31	rit1	sh3bp5l	lmf2	rraga	qdpr		rnf25
																																				ssr1		cenpk	fabp3	c19orf28	cdk8	polr3c	st7	sytl2	pwp2	tsnax		exoc7
																																				lsm14a		atxn3	acvr1	rbm23	ddi1	gata3	camk1	atg4a	sumo1	nek6		actr1a
																																				mad1l1		ankrd37	wipi2	aida	rc3h1	xiap	dedd2	plekha1	srp19	plk2		tmem59
																																				ppp2r5e		mrps11	ap2s1	napa	gabpb1	stx18	nup155	vstm2l	wash1	c15orf63		acly
																																				camk2g		tmem60	ndufab1	rabggta	ap4m1	tbk1	acbd5	ppox	vps11	sap30bp		ivns1abp
																																				znf622		mtmr14	ndufaf4	timp2	hal	f2	gemin6	l1cam	leo1	zranb1		klhl18
																																				qki		ptcd1	rnf126	cisd1	csnk1g2	prkcd	ctnnal1	hectd3	rsrc1	eif4e3		dld
																																				ube2e3		mrpl20	rsrc1	traf7	rfc3	fam49a	dcaf13	ift52	mxi1	spast		atp6v1h
																																				arih1		slc34a2	poldip3	gtpbp2	cdca7l	itgav	alg1	c17orf28	ssr1	lepre1		med27
																																				ctr9		clic5	pick1	phyh	cbx2	aldh1a1	slc34a2	tspan17	srpk1	c20orf4		smox
																																				ccdc25		rassf6	pmp22	col3a1	arid3a	ccnt2	ripk1	c3orf37	nedd4l	tmed5		anapc4
																																				pbx1		lfng	aldh7a1	c16orf5	lysmd4	shkbp1	alcam	tp53i11	stk3	b3gnt5		g3bp2
																																				rrm1		gna14	fkbp1b	dcn	senp6	mesdc2	c9orf80	rnf145	nup35	fuca2		nol6
																																				nutf2		snx33	pax7	ctgf	mafb	tgif1	c19orf61	slc44a1	agps	klf2		ercc5
																																				mdk		rdh13	zhx3	rbm24	wnt5b	acaa1	ptplb	rgs4	hells	ogfod1		ppfia1
																																				smarcb1		etv6	slc35b1	gapvd1	baz1b	syap1	bnipl	pggt1b	psme3	exosc10		ldb1
																																				mfap1		rbpms	taf9b	ppa1	ubr7	tpte2	ggt1	larp6	pcbd1	eif1ad		vti1a
																																				bub3		rnaseh1	rps28p9	commd1	syn2	tmem11	nudt5	pef1	arhgap21	rbm19		gxylt1
																																				nudc		glcci1	tspan31	ncln	cinp	akr1a1	kpna6	bbs5	lsm14a	brcc3		dctn5
																																				pum1		foxred1	trappc9	stx10	ercc8	spty2d1	utp6	c18orf10	nfyb	tmem209		asb13
																																				mpp1		tdrd3	acaa1	rabggtb	hist1h2bj	sap30	rabl5	klhl13	mad1l1	vars		pafah1b3
																																				add3		ccs	coq10a	b3galnt2	not	znf410	st3gal4	dnajb11	taf6l	tp63		suclg2
																																				chmp6		arrdc2	pomp	uchl1	bard1	cd276	hebp1	sbf2	rbm34	surf2		comt
																																				rap2b		recql	plaa	eif2b1	ccdc21	uroc1	ptpn3	wdr37	larp1	vamp2		wdr70
																																				zfand3		cybb	sarnp	brd1	chaf1a	c3orf64	eif2b1	hip1r	wbp4	pdcd11		esd
																																				znf207		csrp1	nrbp1	ndst1	hist1h1t	cndp1	taz	pcdh1	slc25a26	mkrn1		naaa
																																				uba2		rnls	irs4	mtus1	ddx31	arsh	alg3	gga1	rela	mysm1		ttyh2
																																				cbx3		lox	yif1b	stk11	rnf113a	edc3	ndel1	harbi1	fam20b	pepd		st3gal3
																																				rmnd5a		bicc1	utp14a	gata6	parp1	mre11a	gsr	adal	ctcf	scn4b		c14orf21
																																				cdc42		isl1	hipk2	usf2	exosc9	taf1b	emp1	hibch	rnf185	igbp1		taok2
																																				smarcd1		tmem192	casp3	higd2a	kif20a	dscr3	bet1	bcs1l	lin7c	slc29a2		leng8
																																				sf1		cbx5	apool	acat1	ldlrap1	kcnk6	eprs	arih2	ppp1r15b	epn2		rwdd4a
																																				papola		nova2	fam96b	snx12	sin3a	socs3	aldh18a1	limd2	smyd5	mrpl12		adk
																																				marcksl1		nr2f2	polr2d	coq10a	exosc3	fam82b	acads	sufu	tacc3	loxl1		dis3l
																																				thoc1		rara	timm17a	qars	tfdp1	alpl	wdr13	senp1	ppp2r5e	socs3		xpr1
																																				tbc1d10a		prdm12	tsc22d3	fam175b	ppwd1	traf6	tmem66	fbxo45	nid1	slc34a2		rbm9
																																				gspt1		cdc25b	rps21	pygm	cnpy1	itgb1bp2	rer1	prrg1	smc3	timp3		stk11
																																				ythdc1		elavl3	ap2b1	tars	cwf19l1	stk25	abhd5	csnk1d	kiaa0368	fbln1		erlec1
																																				etf1		c7orf25	c13orf1	alg2	fam60a	zeb1	pcf11	lsm14b	farsb	mapkapk2		uchl1
																																				eif6		tsc22d2	aimp1	hint1	spsb4	retsat	scmh1	raver1	psmg1	rnf121		ndufb3
																																				ranbp1		mapkap1	tmem120b	git2	grhpr.2	arl4c	tbc1d23	acot12	prpf6	psmd3		cyth1
																																				paip2b		trim62	mrps7	ppfibp2	ddx56	strn3	btbd2	rassf5	camk2g	herc4		ppp1r13b
																																				g3bp1		tbc1d16	rpl35a	med4	setdb1	grb2	snx7	rbpms2	uchl3	rcbtb2		phldb1
																																				fgfr4		sostdc1	uba3	tyw3	pc.1	upb1	glb1l	aadat	sf3a2	dgcr14		psenen
																																				actl6a		hspa14	nudc	prrc1	lsm8	parp2	traf6	tsnax	polr2d	qpct		tmem93
																																				rbm22		qpct	fbxl5	fam100b	atp2a1	med24	gnas	prkar1a	pip5k1a	hsf2		hsf2
																																				rfc4		ezr	c12orf57	nkrf	ctdp1	mex3c	osr1	adarb1	chd8	gmds		stx5
																																				tspan31		ndfip2	ppap2a	anapc10	gab1	ruvbl1	pag1	cetn1	tsr1	mlf2		dhcr24
																																				ranbp9		mfn2	cyb5a	acox1	smo	arg1	adrb2	heca	jund	slc25a25		gnao1
																																				abi2		epas1	arrdc2	pld3	med9	ddx18	fam73a	ap1s2	zswim4	kcnk6		atg4b
																																				snap29		hbp1	rnf25	ugp2	cdc45l	tsr1	top3b	gng7	c4orf43	atl2		rab3a
																																				pbx2		med16	znf622	actc1	mtf2	nfatc1	kiaa0247	fbxl3	cbfa2t2	ckm		ahcyl2
																																				tmed7		slc35c2	timm44	glrx5	etaa1	acot2	ndst1	coro2b	ccnb3	sirt6		unc119b
																																				ric8a		ywhag	clns1a	fa2h	cwc22	smyd2	tnnt3	nploc4	znf622	cnot4		tmem111.2
																																				kctd10		cxcl12	echs1	polr3c	trim28	tnpo2	slc40a1	fam3a	map2k5	upk1a		lrp2bp
																																				m6pr		flcn	cast	gata3	olfm4	smad4	bod1	fbxo7	ube2j2	aida		mtap
																																				apex1		ttc38	mtpn	xiap	ccnt2	larp1b	atrip	vps25	zhx3	npl		mtx2
																																				calu		alg5	ruvbl2	aldh16a1	shkbp1	slmo2	vill	carhsp1	qki	dhrs4		fgfr3
																																				pak1ip1		wipi1	slc7a3	ggps1	tbl3	fam171a1	mesdc2	pepd	ube2e3	taf3		stambpl1
																																				c7orf28b		elk3	psmb2	cherp	trmt61a	gnpda2	bcap29	rab24	btrc	hebp1		agpat3
																																				c19orf56		stard13	cdkal1	dnase2	c10orf140	ppp5c	eif4e3	edil3	rab10	glb1l		mospd2
																																				fam96b		ddx10	cyb5r3	tmem11	ptpn12	cyb5b	rfc5	tubb3	rpa2	sqrdl		prmt7
																																				cstf2		shh	c2orf34	map1lc3b	nr6a1	c16orf53	commd1	cyp51a1	rhob	nle1		tbp
																																				vps45		slc45a2	aagab	syap1	capn8	diablo	wibg	homer2	arih1	atp6v1h		mrpl11
																																				midn		mrpl23	psmd6	utp6	nipal3	ctu1	mrpl17	gpm6a	mst1	nol6		fen1
																																				casc3		b3gnt2	banf1	pola2	nup107	cse1l	orc3l	cyfip2	efr3a	eif2b4		bmi1
																																				tcea1		p4ha2	mrto4	nid1	ddx51	commd10	c15orf63	tasp1	lap3	klf11		sh3rf1
																																				tmbim6		lipt1	lgmn	supt4h1	c9orf114	chid1	usp20	dirc2	h2afy2	aldh18a1		taf4
																																				fam108c1		dhdds	mtch2	kbtbd2	pak1	mkl1	ezr	cdk5r2	ctr9	gca		capn2.2
																																				yars		fam107b	aph1a	akr1a1	dpp8	zcchc4	hccs	klhl20	sf3b4	timm13		agpat4
																																				rgma		depdc7	polb	rasl11b	purb	wfs1	kctd12	tyro3	dimt1l	myh9		arhgdia
																																				polr1c		tarbp2	clpx	bcat2	gldc	vps18	xrcc6	fam125b	hdac1	rptor		bcl2l2
																																				rab1a		adrb2	map1lc3b	tcp1	ddx59	fuca2	pi4k2a	xrcc3	ccdc25	atp2a2		hint1
																																				cstf3		rngtt	zfp36	pcnp	zfyve1	rbm42	anks3	c14orf4	luc7l	sympk		galk1
																																				alkbh5		acvr2b	slc43a2	c19orf52	alpl	hey1	ttc37	c5orf22	pbx1	rfc5		zbtb5
																																				cpt2		znf276	prkag1	osr1	gjb6	ube2f	cars	cyth2	ppil2	fkbp4		brcc3
																																				ap3m2		hdac8	lrrc47	snx3	uso1	cyp4v2	pgd	fam89a	mett10d	c21orf70		ripk1
																																				snrpc		incenp	cpsf6	tmem184b	dtd1	bre	dhrs12	usp5	cldn7	vps18		kpna6
																																				tmem30a		nudcd3	psma6	brd4	tmem209	c22orf13	snrnp25	snap91	mtch2	usp7		eprs
																																				tktl2		tctex1d1	btrc	sh3bgrl2	rgs4	slc25a10	pphln1	mllt1	nup54	rraga		git2
																																				bmp4		mpp5	coq6	ctnna1	pggt1b	blmh	krt12	kifap3	rnmt	zfp36l2		ubap1
																																				gorasp2		sult1e1	atg4c	mfap3l	larp6	rnf139	otud3	enc1	top2a	myl1		fam129b
																																				rab6a		pola1	ccar1	csnk1g3	pef1	dctn4	ndfip2	gtpbp1	rrm1	gstt1		nubp1
																																				cltc		chek1	lims1	vrk3	bbs5	ethe1	josd2	oscp1	snx12	wash1		asrgl1
																																				clns1a		lig1	cops8.2	ppp2r3c	c18orf10	wasl	ubqln2	mtbp	c7orf41	vta1		ppp2r3b
																																				mtpn		grpel2	hsd17b4	slc4a7	parp2	aftph	btbd10	sox4	zc3h15	c16orf5		polr3e
																																				rnf121		pbk	sod2	cndp2	med24	pccb	gapvd1	ribc2	hibadh	cyp20a1		atp13a1
																																				gpkow		haus6	ddx19b	ptgr1	klhl13	agfg1	ilkap	sirt1	ube2k	sec63		pik3ip1
																																				taf5		kiaa1841	psma4	scpep1	dnajb11	ppp1r11	mtus1	zufsp	nutf2	eml4		impad1
																																				clk3		chaf1b	idh3b	eps8	leprot	med7	clic5	c12orf5	mettl3	rps15a		slc41a2
																																				nipsnap1		xrcc6bp1	cebpb	agps	tspan15	c19orf6	spast	psip1	dbn1	snx5		eps8
																																				ddah2		scnn1a	elf2	zeb1	usp16	nedd4l	abtb1	slc7a5	adam10	fam50a		tmem185a
																																				med15		rab3d	psmc6	rpl38	rbp1	hcca2	ncoa2	nek8	snrnp70	hccs		gcat
																																				klf8		kbtbd10	hbs1l	lmo7	chn1	trappc9	pih1d1	dapk1	thoc4	xab2		drg1
																																				pds5b		six1	myod1	slc25a12	ppp2r2b	hsd17b4	git2	psat1	kank1.2	ireb2		tprg1l
																																				ccdc28b		has2	phyh	fabp3	rpap1	fahd2a	edem1	arfgap2	sh3bgrl3	dnajb9		yif1b
																																				cldnd1		ppard	nmt2	echs1	melk	bcap29	plekhb2	btbd3	mdk	asb13		ppfibp2
																																				bub1b		mul1	dnajb12	pcif1	hexim1	ttc37	ubap1	pgap3	trappc3	actc1		mboat7
																																				ankrd10		ddi1	lsm14a	rab21	cep57	atf5.2	fbxo3	galk2	acsbg2	rprd1a		cnot10
																																				acbd6		itpkc	chmp4b	slc30a5	psmg2	pacsin2	mrpl45	orc5l	ppp6c	wbscr16		tmx3
																																				gtf2a1		akap2	ubl3	actn4	kif2c	sike1	klf2	cbr4	sarnp	ostc		sec24d
																																				c9orf82		psph	ndufa10	arg1	gtse1	tmbim1	tmed5	znf509	kiaa1012	pelo		mcrs1
																																				epha4		lin28	cgnl1	sqrdl	map2k6	rcan1	nucb2	btbd8	ppp1r14b	ccdc28b		med8
																																				brix1		dlx3	usp25	bco2	cpped1	clcn3	znf330	enosf1	cnih	psme3		pppde1
																																				tbpl1		znf384	ggnbp2	cab39	slmo2	serinc3	rg9mtd2	fbxw7	hmg20a	ctsz		ints12
																																				tmem48		tbl3	mrpl24	c12orf10	slc15a4	gpx3	stxbp3	arhgap26	sppl3	rragc		pigq
																																				cidea		trmt61a	mrps17	sike1	irs1	arf3	rbm19	abat	casp3	taf6l		wdr67
																																				hbxip		c10orf140	sars	rbm42	orc4l	rgp1	exosc10	atp6v0a1	smarcb1	plekha1		kiaa1524
																																				sec63		ptpn12	tpp1	tmbim1	rpp40	fam107a	mmadhc	thop1	smarca5	ctnna1		slc35a1
																																				tpp2		nr6a1	ddx1	dtymk	slc27a6	cnot7	prmt3	ttyh1	rasl11b	stk39		chst7
																																				sap130		capn8	ethe1	rcan1	rnmtl1	amotl1	dhodh	fezf1	mfap1	tnfrsf10b		pcgf2
																																				srfbp1		tmem127	eif2b3	clcn3	casp7	tgfbr1	stk19	rasa3	lmnb1	cttn		kiaa1600
																																				rpf1		tfdp2	gng5	wipi2	c20orf11	pam	serpinf1	tfap2e	c1orf77	bco2		ttyh3
																																				tp53bp2		med23	psme4	cyb5r3	xrcc6	c19orf63	ccbl1	b3gat2	ubqln4	larp1		c1orf43
																																				nup205		nipal3	mkl1	ethe1	vac14	anxa7	bre	adat2	tmem39b	hcca2		fam82a2
																																				setd8		tm7sf2	atp5d	sesn1	wipf2	kiaa1012	gmds	fdxr	myd88	rxrb		rhobtb1
																																				cxorf56		rufy1	atpif1	pgam1	hipk1	auh	zmpste24	elmod2	nasp	fxc1		bcar3
																																				arl5a		dtd1	aldh2	serinc3	zfx	triobp	epn2	man2a2	eif3j	ppm1l		c17orf49
																																				tia1		styx	lap3	tdrd7	r3hdm2	arhgap1	rbm23	mid1ip1	bub3	atp1a2		sirt7
																																				nup93		cldn12	pi4kb	ints8	fam171a1	gpx1	fam129b	sh3bp5l	yrdc	anp32b		sec11a
																																				rpp30		klc1	mgat2	prmt3	gnpda2	nucb2	mad2l1	kctd12	nudc	smc1a		prmt10
																																				ehd1		c11orf54	chp	igbp1	ppp5c	nfix	mib1	plekhb2	tmem128	dctn5		etv1
																																				slc25a13		srebf2	cdk2ap1	mpst	c7orf26	mfge8	kdelc2	atp1a2	c9orf78	cept1		edem3
																																				hspa4		qdpr	erlec1	pigt	padi2	add1	nubp1	col1a2	gsc	arrdc3		smcr7
																																				c1orf55		c19orf62	nup88	dgcr2	tfap2a	fam98a	sdad1	cdk5rap3	hspa5	fgfr1op		nrbp1
																																				frs2		camk1	acad9	tubg1	ascc2	znrf1	hspbp1	rela	pum1	txnip		tyw1
																																				drap1		st3gal4	atp6v1b2	nusap1	zdhhc16	coq6	mfn2	idi2	hsdl2	tmem11		higd2a
																																				kiaa1826		tbc1d23	rpf1	rcbtb2	rbm12b	amfr	dnajc8	c8g.2	ap2s1	ndufa6		tyw3
																																				stard7		mtmr10	cpsf4	stk40	pphln1	gmppa	slc2a1	hsd17b12	ranbp3	acat1		prrc1
																																				cox4nb		fam50a	npepl1	kif4a	kdm6a	eif4e3	urod	fkbp1b	psme4	kiaa0368		lars
																																				cdkal1		prmt5	cul4b	vdac3	tspan1	rfc5	chmp2b	zfp36	mpp1	rufy1		slc25a1
																																				arvcf		cttn	eif3j	gpx3	dlx6	ndrg1	add1	idh3b	tob1	c19orf61		donson
																																				fbxl5		abr	tp53bp2	arf3	gins3	rap1a	map3k7ip1	mdh2	add3	dera		alg8
																																				c12orf57		impa1	kcmf1	rgp1	mtm1	thtpa	smarcc1	ppap2b	chmp6	sf3a2		gatad2a
																																				gtf2h4.2		golga5	sqstm1	fam107a	map3k7	gtpbp10	chchd4	ftsjd2	snx27	nr4a1		coq10a
																																				fxr1		wdr45	map1lc3a	cnot7	smcr7l	gnb4	atp5j2	emid1	clk1	gkap1		fam100b
																																				sncg		nt5dc3	nup205	amotl1	psmd9	c5orf24	herc4	slc37a3	znf346	smox		tax1bp1
																																				c11orf60		slc20a2	syap1	tgfbr1	hif1an	ppp2r4	epb41l4a	gdap2	h1f0	zfyve21		eps15l1
																																				slc30a9		ensa	c5orf32	pam	orc1l	ncald	epas1	app	ap2b1	tmlhe		ctps2
																																				mtx1		edil3	tpp2	c19orf63	c11orf10	sap30l	optn	osbpl2	rap2b	pofut1		ttc15
																																				arl6		rbpms2	hibadh	wasl	tmem38b	lmf2	psmd3	rabggta	fbp1	ythdf1		usf2
																																				nars		rgs4	tmem39b	aftph	fgfr1op	sytl2	c9orf114	timp2	zfand3	prpf3		nkrf
																																				rnf146		pggt1b	eaf2	pccb	lancl1	slc25a32	slc38a9	lsp1	maea	retsat		anapc10
																																				ube2e1		larp6	rapgef1	agfg1	rtn1	gramd4	exosc7	slc43a2	matr3	snx10		ppt2
																																				kif3a		pef1	ifrd1	anxa7	cbr1	wbp2	fnta	nr1h2	cwc15	cbfa2t2		syngr1
																																				ube2d3		bbs5	ptp4a2	ppp1r11	appl2	anapc7	chuk	vamp2	nup88	prmt7		rint1
																																				eif4e		c18orf10	sf3b2	kiaa1012	pih1d1	cars	col3a1	zdhhc2	jagn1	c12orf10		tspyl2
																																				timm13		gga1	mdh2	hey1	sbf2	ubqln2	retsat	rab30	chmp4b	sumo1		etv3
																																				dynll2		harbi1	cry1	med7	wdr37	becn1	cnot7	tmlhe	yes1	srp19		ppp1r3b
																																				galnt1		adal	rgs2	c19orf6	hip1r	atg4a	ndrg1	lect1	flot2	map2k5		ndufa6
																																				supt5h		hibch	tob1	auh	pcdh1	plekha1	phf10	bat2	grhl1	klhdc3		rala
																																				ftsj1		bcs1l	hsbp1	triobp	nudt5	vstm2l	sgpl1	jkamp	dazap1	aldh7a1		wdr5
																																				stim1		arih2	pfkm	arhgap1	samd4b	ppox	emp2	ppp1r1a	tmx2	vps11		lpar1
																																				rad21		limd2	psmc4	gpx1	pgd	l1cam	ube3a	mark2	cul1	slc40a1		ppp1r8
																																				stam2		sufu	ptp4a1	gpi	ftsjd2	hectd3	mlf2	eef1a2	dlat	cdk5rap3		pgs1
																																				ube2v2		fbxo45	sesn1	dcun1d2	emid1	ift52	fbxo33	scn4b	znf207	kiaa0247		nr2f6
																																				mrto4		prrg1	amfr	fmr1	arhgap29	c17orf28	ckm	mef2c	cgnl1	kiaa1310		hprt1
																																				trappc4		aadat	eef1d	lipe	dnajb9	pgd	tcp1	dnajb4	nthl1	tle4		ankrd12
																																				exosc8		tsnax	cstf2	cdk5rap3	ccdc61	ftsjd2	mtmr10	prkca	ubap2	snn		cenpm
																																				setd6		prkar1a	fip1l1	mrps34	stk19	emid1	rufy1	slc38a2	bap1	tpd52		mnat1
																																				crk		adarb1	ndufb10	coq9	chst12	kctd12	asrgl1	opn1sw	kdelr1	rassf2		c1orf89
																																				ephb4		cetn1	actr10	c18orf19	mrpl17	slc37a3	snx10	evl	ykt6	syngr2		limch1
																																				nsun2		heca	c7orf20	snta1	ube3a	tor2a	lnpep	nell2	fscn1	nup35		dstyk
																																				smc4		ap1s2	myl6	ndufa8	elmo1	bckdk	orc4l	rxrg	ccnl1	dhx15		ext2
																																				nle1		gng7	gtf2h4.2	lsp1	snx1	oaz2	brd1	zc3h7b	sf3a1	sri		c19orf40
																																				tmem167b		fam3a	lsm4	ndufs3	b4galnt1	gdap2	aida	gja1	cnot3	tspan1		aldh4a1
																																				hipk2		vps25	thbs1	casp3	znf143	rela	leo1	ptpn4	ogdh	rnf11		fam69a
																																				kti12		carhsp1	pgm1	zfp36	prph	fam18b	elmo1	pdk1	sec62	golga5		cdknx
																																				thoc7		rab24	gyg1	slc43a2	c14orf109	rbm23	otx1	fmnl1	gnai1	nt5dc3		myl1
																																				rnaseh2b		tubb3	nosip	ppap2b	decr2	cisd1	mcoln1	fyn	clk2	tmx1		ugp2
																																				pla2g12a		cyp51a1	ube2i	frmd8	zswim1	ppap2b	elavl1	riok1	krr1	apoo		thbs1
																																				banp		homer2	xrn2	txndc9	c7orf46	tsg101	c1orf21	cox18	uba2	aldh16a1		sgk1
																																				wdr3		gpm6a	chmp6	bckdk	sel1l	app	zfyve21	ndor1	cbx3	dnajc19		eno1
																																				kdm3a		cyfip2	syncrip	rcn2	znf750	osbpl2	tmem115	commd1	morf4l1	blmh		cuta
																																				gtf2f1		tasp1	efnb2	hsd17b12	bcl6	sh3bp5l	usp16	anks3	gmnn	tmbim1		pcolce2
																																				nob1		dirc2	gabarapl2	oaz2	btbd10	fkbp1b	rpp40	melk	nosip	lsm7		fstl1
																																				ptbp1		cdk5r2	sirt5	tsg101	ttc7b	sod2	xpnpep3	sppl2b	kpna2	capns1		cnpy2
																																				rprd1a		klhl20	rplp2	app	etfdh	idh3b	ifrd2	ocln	ucp2	cpsf2		frzb
																																				papd4		tyro3	ppap2b	osbpl2	isl1	cebpb	prdm1	wbscr22	rmnd5a	rhob		mylpf
																																				csnk1e		fam125b	mboat7	nr1h2	serpinf1	aldh2	dnajc17	dcaf12	syncrip	uap1		slc38a9
																																				arfgap1		xrcc3	ergic2	vamp2	fam154b	mdh2	mdm4	ncln	cdc42	arih1		actc1
																																				nfya		c14orf4	fscn1	mapkapk2	mybl2	c19orf28	rnd3	syvn1	gnai3	sike1		glrx5
																																				hes1		c5orf22	nudt21	ap1ar	slc22a5	aida	zmym4	nup54	yipf5	prnp		atp2a2
																																				stx16		cyth2	clk1	cry1	rnf41	napa	mrpl16	rnf41	smarcd1	slc39a9		acer3
																																				mms19		fam89a	arl1	prkag1	abhd11	rabggta	myh9	c18orf25	psmd4	ndufs3		lysmd4
																																				slc9a3r1		usp5	tpm1	syvn1	cog7	timp2	ubox5	vps11	ppap2c	slc25a26		pkp4
																																				mrpl3		snap91	ucp2	nup54	alg3	traf7	ccnk	slc35a3	sf1	plekhb2		sympk
																																				arpp19		mllt1	tmem50a	mtmr9	josd2	gtpbp2	fam50a	tacc3	papola	esrp1		dkk1
																																				tmem101		kifap3	atp6v0d1	ndufb3	st3gal3	cdk5rap3	nfe2l2	stx10	dgat2	mcts1		phax
																																				rxrb		enc1	cops6	ppm1l	tnfaip1	coq9	bin3	rabggtb	chd4	rrp1b		pgm2l1
																																				cnih4		gtpbp1	denr	cyth1	c14orf21	c18orf19	mars	b3galnt2	akr1b1	slc31a1		hist1h2bj
																																				trmt6		oscp1	ip6k2	erlec1	taok2	snta1	ireb2	mlst8	ppap2a	amotl1		not
																																				actr6		mtbp	pdk4	eaf2	leng8	lsp1	prmt5	commd2	txnl1	snta1		tgif2
																																				vav2		sox4	hpgds	xpr1	b4galt7	casp3	tex10	med10	cabc1	hyal2		rhebl1
																																				senp3		ribc2	actr1a	rbm9	plin3	zfp36	habp4	dscc1	nono	abr		bard1
																																				tpmt		sirt1	tmem59	ppp1r13b	dhodh	slc43a2	atf5.2	usp4	marcksl1	lsr.1		ccdc21
																																				znf395		zufsp	des.1	phldb1	sec11a	rcn2	arf6.2	fam151b	hnrnpa3	smyd5		chaf1a
																																				cdc14b		c12orf5	txnl1	psenen	c9orf41	hsd17b12	rag1ap1	hexim1	cdc73	cotl1		hist1h1t
																																				wdr69		psip1	cltb	lbh	slc34a2	nr1h2	melk	cep57	atp5g1	mccc2		ddx31
																																				ak3		slc7a5	fos	sirt4	snx33	vamp2	nfyb	psmg2	col4a3bp	nr1d1		baz1b
																																				c1d		man2a2	bat1	pmpcb	fst	mapkapk2	strbp	kif2c	cd82	dcn		c14orf135
																																				setd4		mid1ip1	pcmt1	aspscr1	palm	ap1ar	cxcr7	gtse1	caprin1	dmap1		adar
																																				nt5c3l		ostc	syf2	stau2	kpna6	sypl2	myl1	map2k6	hnrnph3	ctr9		rnf113a
																																				prickle1		btbd2	adsl	phf1	rbm19	zdhhc2	vgll4	irs1	ddx42	ptcd3		cks2
																																				wdr89		plekhb2	ensa	gpn2	dzip1	atp1a2	zfp36l2	b4galt7	cdc34	ppfia1		foxh1
																																				mta1		ckm	cebpg	tfcp2	prmt10	col1a2	lsm7	nup85	ube2l3	spns1		parp1
																																				c21orf59		mospd1	golga7	klhdc3	etv1	idi2	c16orf5	ikzf5	gyg1	psmg1		prc1
																																				fzd7		c8g.2	dync1li1	vbp1	edem3	selenbp1	capns1	ccdc85c	thoc1	memo1		ddx24
																																				sirt6		pdcd10	vezf1	tmem120b	alg6	ipo9	pds5a	ncaph2	tbc1d10a	mcrs1		lrrc8e
																																				nat11		tspan15	cabc1	acad9	yipf6	errfi1	kdm6a	mobkl2a	shmt2	c8g.2		sall4
																																				cobra1		ppp1r1a	slc44a2	atp6v1b2	clcn7	rab30	ubxn6	lrat	hpgds	smtn		exosc9
																																				eif2c2		mark2	sdhb	ip6k2	taf4	tmlhe	sike1	neurl	ube2i	c18orf19		kif20a
																																				polr1e		mef2c	rab7a	upf1	mylpf	lect1	fam98a	ankrd11	dci	nip7		fbxo5
																																				sap18		slc38a2	rab11a	alas1	atp2a2	ube2e2	bckdk	kif23	sirt5	ap3m2		cwf19l2
																																				dnal4		opn1sw	atp5g1	pan2	ankrd13c	cyp20a1	c4orf41	rap1gds1	prpf18	gpr107		ldlrap1
																																				nup43		evl	zc3h11a	mrpl45	trim36	bat2	rps15a	plk4	gspt1	raf1		armc1
																																				snrnp40		nell2	acadl	sgpl1	pkp4	ogfod1	lztfl1	dolk	mta2	qsox2		lyar
																																				rbm26		leprot	ranbp9	rraga	trim29	nr2c1	gale	ppil5	sdha	irf2		golga2
																																				slc35e1		prdx2	uba52	smyd5	ccnb2	rnf41	cttn	prex1	sf3a3	aco1		tspo
																																				hs2st1		aass	rpl34	luc7l	acbd5	sppl2b	syngr2	dlx5	ythdc1	pip5k1a		ccne2
																																				snrpf		ddx1	birc2	cpne1	mysm1	c18orf25	trmt2a	itgb3	usp10	ccnb3		ncaph
																																				sap30bp		c2orf34	rab14	rpa2	rassf7	vps11	slc10a7	ascc2	brd7	glo1		h1foo
																																				c1orf156		atp5j	rbm8a	hsdl2	pan3	ocln	adamts1	cdk5	etf1	ppp3ca		zp4
																																				blzf1		mknk1	riok3	socs6	sdr16c5	slc35a3	gpn2	tfap2a	psmd7	ammecr1		endog
																																				cdc25c		tmem181	psma1	dera	stxbp6	tacc3	xab2	alcam	gtpbp4	tomm70a		otx1
																																				polr2h		ddx6	chchd3	gnai2	itpkc	ncln	vezt	fnta	med25	c19orf63		rbmx
																																				rbm12		rxrg	ppp2r5c	rnf13	slc38a9	stx10	snip1	capns1	mgmt	phf10		imp4
																																				cetn3		rpap1	ppp2ca	itpk1	sesn2	rabggtb	csrp2	rraga	aes	suz12		ik
																																				znf740		anks3	loc646644	msl3	slc35c2	syvn1	actc1	c11orf46	eif6	srp68		osgep
																																				mfap3l		melk	pum1	pcolce2	lhx5	nup54	nfkb2	snx12	psma1	ndrg1		cdca8
																																				mcts1		wbscr22	gsn	fstl1	klhdc2	commd1	fxc1	cebpg	copb2	wipi2		rnf168
																																				supt16h		dcaf12	smpd4	rab8b	cep120	b3galnt2	blvrb	cpne1	psmc4	cfp		smarcc1
																																				cul4b		hexim1	rpl35	trim33	por	mlst8	wdr75	sh3glb2	bnip3	rpl22l1		upk1b
																																				asw		cep57	stk38l	c11orf46	adar	commd2	polr2f	nova1	anxa11	psmd14		rpia
																																				qtrt1		psmg2	glrx3	agpat1	taf6	med10	xiap	socs6	smpd4	lars		ccdc49
																																				c8orf42		kif2c	bysl	nr4a1	fam58a	plin3	atp1a2	atp6v1b2	ranbp1	rnf126		dbf4
																																				suds3		gtse1	ap3s1	pip4k2a	ttc4	yipf2	abr	acox1	lhx1	utp15		dcaf10
																																				rps17		map2k6	cnbp	pdk4	tchp	eaf2	tmem49	phf1	snrpb	lrrc58		arf6.2
																																				rrp7a		nup85	qars	ednra	oxnad1	aco1	nufip1	dera	anp32a	naaa		plk1
																																				sri		ikzf5	copb2	c2orf76	osgep	alg6	glrx5	spred1	psmd1	pam		akr7a2
																																				rrp1b		ccdc85c	pcna	rnf126	rbms1	yipf6	vps37b	iqgap1	atp1b3	aass		atp6v0e1
																																				vezf1		ncaph2	arl6ip1	uba3	snip1	bet1	sppl2b	tubb2b	hadha	kpna3		racgap1
																																				fam53a		mobkl2a	cct7	tpp1	nip7	sh3glb2	trpc4ap	dlx6	anp32e	snx12		cdk2
																																				grpel1		lrat	zfand5	rbmx2	orc3l	nova1	znf143	ikbkap	sart1	pigt		fkbp4
																																				smarcd2		acat2	nfyc	ube3c	spc25	tfcp2	camlg	atp6v1a	stip1	ube2j2		srpk1
																																				papss1		cpped1	rbm45	syngr2	mad2l1	vbp1	col1a2	spop	thrap3	qki		nid1
																																				usp7		mgat1	cops5	dcaf10	otx1	socs6	ppp2r3b	rtn2	slc16a3	eif2b2		zhx3
																																				ttc30		cav2	pfn1	ing2	rhebl1	gnai2	stk39	cdc42ep4	psma3	mrps34		btrc
																																				lypla1		fdx1	cbs	dbt	cks2	capns1	igbp1	mettl13	arf5	dld		tmem39b
																																				cgn		agk	aldh3a2	snrnp48	lrrc8e	ruvbl2	c22orf13	gli3	fgf8	cdc5l		sf3a3
																																				slc30a6		slc25a22	ghitm	ip6k1	sall4	atg4c	amotl1	arsa	pnrc2	nmd3		rpe
																																				ndufb2		mrps30	dci	c20orf30	armc1	cltb	polr3e	nt5dc1	syf2	nutf2		nup155
																																				vangl2		cars2	rpl37	cdkal1	lyar	cebpg	larp1	st8sia1	golga7	sema6d		dhrs12
																																				znf639		acads	pgam1	emp2	tspo	phf10	nop14	lmx1b.1	ssb	bin3		exosc7
																																				dad1		kdelc2	ubxn1	slc39a9	dbf4	llgl2	sssca1	gpx7	dcaf11	mapk8		ifrd2
																																				csnk1g3		rpp40	nfkbia	lta4h	racgap1	soat1	pus7	c15orf29	hmgn2	ccdc53		syngr2
																																				vrk3		ggnbp2	bin1	hbxip	birc5.2	c16orf13	lsr.1	mbtps1	sdhb	utp14a		gins4
																																				ppp2r3c		pabpc4	hadha	rpp30	pank3	elf1	bsdc1	pag1	ddx17	psmb3		anp32b
																																				slc4a7		exoc5	fbxo9	ehd1	rexo2	hdac2	arg1	tmem115	cdknx	parvb		mcm4
																																				cstf1		orc4l	tceb2	slc25a13	txnl4a	snx12	gkap1	rnd3	rbm8a	tax1bp3		bckdhb
																																				cirh1a		dapk3	ipo5	arvcf	lepre1	qars	impa1	rab13	paip2b	rbm34		acadm
																																				eif1ad		tfap2a	upf1	shpk	ung	pld3	gtf2e2	tchp	ppp2ca	kank1.2		sdf2
																																				slc25a44		dlx5	ube2b	dld	e2f3	atp6v1b2	polr2g	oxnad1	rpl35	prdx5		ngdn
																																				tulp3		c5orf30	sdha	ercc5	c13orf34	ip6k2	ppm1l	kdelr3	sae1	hbp1		cherp
																																				grwd1		ascc2	ndufv1	vti1a	noc3l	upf1	kiaa0174	loxl1	metrnl	fam18b		plod3
																																				hbz		cdk5	sdf4	phf13	aurka	sgpl1	acox2	dnase2	pgk1	aimp1		ammecr1
																																				wdr36		zdhhc16	btg2	mcts1	mat2b	smyd5	ube2f	coasy	ncor1	kpnb1		prkag2
																																				b3galtl		rbm12b	etf1	ndufb2	ccnd1	luc7l	napa	src	prmt1	lsp1		rrbp1
																																				wbp11		nae1	hspa4	supt16h	utp23	cpne1	nampt	ccnf	nhp2l1	pdlim1		srm
																																				fam49b		txndc15	ipp	apool	ccdc58	hsdl2	rab3ip	nr1i2	tef	scpep1		spry2
																																				rilpl2		rab11fip5	mobkl3	nudc	slc7a6	rnf13	cox17	mybl2	ncoa5	phactr4		surf6
																																				chic2		gemin6	psma3	ccar1	tm9sf2	acox1	gins4	rbm24	g3bp1	sbds		ano5
																																				pten		alcam	itgb1bp3	cul4b	zmym2	phf1	ppp3ca	ptp4a3	eif4a3	uhrf1bp1l		strap
																																				serpinh1		bod1	psmb1	mboat7	mesdc2	gpn2	glo1	c7orf60	ahcy	atp5h		cops3
																																				seli		pphln1	alas1	clk1	tgif1	tmem120b	c16orf35	tyrp1	ndufv1	osbpl2		tmpo
																																				pi4k2b		fnta	adrm1	col18a1	vars	pan2	ocln	trip13	rad23b	tomm40		nol10
																																				baz2a		mrpl16	med25	tomm70a	xpnpep3	mrpl45	ncl	znf598	tubb	gps2		hpgd
																																				papolg		kdm6a	sgk1	mrpl21	foxh1	rraga	ccdc109b	frat1	c16orf72	c12orf11		fut8
																																				dido1		cnot4	pmpca	c3orf19	tpmt	rpa2	anp32b	mylip	cldn4	pex19		loc419599
																																				rarg		tspan1	cd81	clasp1	ccbl1	dera	etfdh	anln	aldoa	dpysl3		sesn2
																																				aldh1a2		mett10d	psmd7	glod4	shh	itpk1	c4orf43	nme5	pa2g4	dimt1l		taf6
																																				tcf7l1		ccnl1	arf5	kpna3	tarbp2	msl3	atp13a1	thbs4	psmc5	furin		fam58a
																																				ccdc124		lrrfip2	fam48a	tmem85	rngtt	c11orf46	smc1a	pitx2	eif3h	kiaa1012		ttc4
																																				actr3		nuf2	aldoa	cpsf3	mpp5	fam108a2	ppa1	lyrm1	gps1	bccip		crkl
																																				psmd8		eif4ebp2	ddx17	cdc40	sult1e1	akt1s1	rassf6	foxc1	mst4	tsn		ddb1
																																				anxa3		atf1	matr3	sppl3	pola1	sh3bp4	tmem11	fbxl20	myef2	col1a2		ndc80
																																				isl1		erf	pa2g4	cwc15	kcnk6	prdx4	kcnk6	bcam	clta	slc30a5		st3gal6
																																				f2		dlx6	paip2b	zcchc10	rs1	gphn	pik3ip1	nsdhl	ctsb	nol10		rnf126
																																				rc3h1		ikbkap	sfrs9	ica1	arl10	ilkap	psmb7	phactr1	smarce1	smarcb1		ing2
																																				c1qbp		atp6v1a	sf3a3	e4f1	alkbh6	fxc1	cept1	gosr2	ppp4c	rpp30		mcm2
																																				cdc27		rtn2	serinc3	hsd17b10	prpf31	nampt	pcif1	fam175b	rpl28	tcf25		dbt
																																				dlx5		cdc42ep4	ppa2	thap1	mcoln1	spred1	arrdc3	fst	eif5	fam53a		snrnp48
																																				mrpl48		gins3	ppm1a	mfap1	top1.1	rragc	smtn	cndp2	ddx39	akr1a1		rpa3
																																				sdccag10		mtm1	pgrmc2	asw	hist1h2bo	cdca4	atl2	ccni	rpn2	bsdc1		crcp
																																				itgb3		map3k7	ap1m1	qtrt1	usp44	sdf2l1	mfsd5	c11orf2	psmd2	ndufaf4		mon2
																																				c5orf30		smcr7l	gclm	c8orf42	znf395	dusp12	glod4	sfrp1	serbp1	sephs1		qtrtd1
																																				mrps12		psmd9	ctnnd1	suds3	cdc14b	c1qbp	ubl5	ptgr1	nnt	slc25a13		sacm1l
																																				gatsl3		hif1an	btf3l4	rps17	wdr69	itgb3	kiaa0368	ppp1r15b	pno1	ube2d1		klf10
																																				fam76b		orc1l	cdknx	rrp7a	ak3	bin3	rpl22l1	mrpl24	hnrnpc	rhou		spryd4
																																				prkcd		c11orf10	psma5	vangl2	c1d	iqgap1	cnot4	ptcd3	u2af2	cndp2		tgs1
																																				ascc2		tmem38b	usp14	znf639	setd4	snx14	tgfbr1	scpep1	cct3	smad1		spc25
																																				psme2		fgfr1op	ilk	dad1	nt5c3l	myh10	pam	clk1	hnrnph2	cpsf6		ercc8
																																				cdk5		c11orf58	idh3g	cstf1	prickle1	c9orf72	aco1	rptor	ipo7	c1orf77		coq5
																																				zdhhc16		spin1	rac1	cirh1a	wdr89	gns	rab13	rasgef1a	sar1a	pfdn5		ints2
																																				rbm12b		ppp2r5a	myef2	eif1ad	mta1	pdk4	mcm4	hunk	rps16	serinc1		top3b
																																				sec22a		ift20	tuba4a	ptcd3	c21orf59	nr4a1	ikbkb	palm	uqcrc1	mtch2		exosc10
																																				fktn		tmem50a	psmd12	polr3e	rere	c2orf76	jak2	pygm	lypla2	zswim4		mad2l1
																																				sh3bp4		gpn3	shmt1	pik3ip1	thbs4	aqp3	dcxr	me2	sfrs7	pik3ip1		xpnpep3
																																				nae1		hspe1	c3	mcrs1	esyt2	c9	c19orf63	pigs	rpl31	gcat		snip1
																																				whsc2		slc25a25	ranbp1	kiaa1267	shroom3	trip4	eif2b4	mef2d	eif3l	fuca1		pola2
																																				prdx4		mrpl41	ssb	fbxw8	smcr7	tchp	wdr74	tars	eif1b	fkbp1b		lmo7
																																				gphn		ndufs5	ptges3	gstt1	nrbp1	oxnad1	kpna3	alg2	hmgb2	tspan13		tmx1
																																				c14orf133		mmp15	sfrs6	fbxo42	ppie	supt3h	bckdhb	hsp90aa1.1	npm1	lrrc47		nip7
																																				tfap2a		phc2	cox4i1	ube4a	mapk12	kdelr3	prpf3	cnrip1	kpna4	myl9		ssr4
																																				tdrd7		tfip11	rpl28	stk38l	zic1	tmem115	sip1	cpe	fgfr4	tax1bp1		irf2
																																				txndc15		tbc1d7	pgk1	tbx1	sfrp2	loxl1	rbm7	lpin2	hnrnpu	pcyt2		mfsd11
																																				pan2		hs3st1	ak2	saps3	lrrn1	clcn5	ythdf2	fam102a	st13	copb1		gipc2
																																				ints8		fam54b	vps26a	ggcx	zic3	dnase2	cpsf7	trim29	ndrg2	rab21		ctbs
																																				rab11fip5		dnm2	uqcrfs1	acadm	gbx2.2	uba3	atp2a2	utp6	hif1a	rpn1		acp5
																																				st7		myst2	dcaf7	ano5	pkmyt1	ube3c	rabgap1l	orc3l	fus	zc3h10		map1lc3b
																																				acbd5		fkbp3	tbc1d10a	pon1	tyw1	gpx7	slc25a10	tnpo3	rpl21	kctd10		hbs1l
																																				gemin6		blvra	sccpdh.2	mrpl12	arpc5l	rab13	impad1	foxp4	txnrd3	c14orf147		stk38
																																				alcam		snapin	tpm4	dvl3	ror2	pura	slc7a7	ubr7	dlst	ccni		sh3glb1
																																				taz		tmem205	hk1	urod	yipf4	klf2	prkd1	syn2	tra2a	gtf2f2.2		aars
																																				bet1		sdsl	rnpep	ssr4	klf5	rnd3	pola2	cinp	actl6a	hsdl2		aptx
																																				bod1		bcl11a	rpl18	mfsd11	dnajc1	tor1b	slc41a2	pdia4	odc1	pmpcb		kctd2
																																				vill		elp3	dars	ctbs	stk38	mbtps1	slc24a6	fkbp9	elovl7	mst1		prpf38a
																																				xrcc6		dnajc3	anxa2	ccne1	hoxd1	coasy	eps8	mcm6.2	cd2bp2	pnpo		ccnh
																																				krt12		plrg1	hnrnph3	gnpnat1	tnpo3	src	zdhhc3	fnbp4	psmc1	ptpra		utp14a
																																				pphln1		gstk1	bnip3	rnf111	ddx24	zcchc8	blmh	uso1	skp1	rcan1		dolpp1
																																				ilkap		dnttip1	rab18	tmem39a	sh3glb1	lta4h	nedd4l	rabac1	slc20a1	bhmt		med20
																																				mrpl45		hebp1	cct2	epb41l3	aars	sgsm3	cdk5rap3	hint2	psmc2	trip12		fam168b
																																				znf330		ptpn3	dlat	zfp36l1	aptx	rere	rraga	dcaf6	rbm22	dbn1		guk1
																																				prmt3		hccs	cdv3	coq7	kctd2	sfrp1	c11orf46	cpeb1	rps15	pgm1		prkrip1
																																				herc4		spast	wdr1	plk2	prpf38a	eprs	sh3bgrl3	fam126a	lsm12	ssbp3		mrpl12
																																				fnta		epn2	rpl22	idh3a	ccnh	gnas	gstt1	rangap1	cct5	mrpl24		ccne1
																																				chuk		nfe2l2	stip1	papd4	acaa1	kank1.2	msh6	kiaa0247	itm2b	slc25a39		gnpnat1
																																				phf10		ubxn6	frg1	stx16	mex3c	gmfb	dnajc19	glo1	vcp	grsf1		slc37a2
																																				sgpl1		adamts1	laptm4a	mms19	pdia4	cnot10	aldh16a1	pcif1	arpc2	copg2		cant1
																																				mrpl16		lsr.1	rps16	pick1	h1foo	tmx3	lmo7	kiaa0368	ywhaz	mbd1		e2f4
																																				bin3		bsdc1	sucla2	idh3g	nup37	ptgr1	tax1bp3	rabgap1l	calr	tpp1		rnf111
																																				ireb2		kiaa0174	rab2a	scfd1	prkab1	ppp1r15b	pon1	robld3	khsrp	slc25a30		tmem39a
																																				capns1		dcxr	sumo3	ddx54	rgs19	drg1	map2k5	rab21	hmgn1	ctbs		golt1b
																																				kdm6a		ssbp1	suclg1	myl9	lef1	sec24d	lpar4	slc25a12	hadh	add3		c12orf32
																																				vezt		pias4	uqcrc1	herpud1	gga1	pik3ip1	wbp4	gtf2b	mat2a	fam96b		plcb3
																																				gpn2		grsf1	cct4	mettl14	harbi1	yif1b	copg2	pgrmc1	cct8	epb41l3		eif4g1
																																				fxc1		vps37a	rtn3	rnf34	adal	mrpl24	mrps34	c6orf136	hsp90ab1	mdk		smc2
																																				blvrb		phgdh	nek9	pitrm1	hibch	tprg1l	h2afv	fabp3	ldhb	nrarp		sin3a
																																				wdr75		ppm1b	sec23b	stag2	rangap1	cndp2	hbp1	anxa1	dazap2	arpp19		exosc3
																																				nufip1		lancl1	ivns1abp	robld3	ruvbl1	eps8	coq9	sec14l5	srp72	wdr45		tfdp1
																																				stk39		rtn1	ube2g1	jund	tmem127	ptcd3	hiat1	echs1	eif3i	syvn1		ppwd1
																																				igbp1		pisd	mcl1	aagab	socs3	mcrs1	ssbp1	slc30a5	stmn1	pycr1		cnpy1
																																				larp1		mcfd2	map2k1	lgmn	rnf20	rasl11b	znrf1	lgmn	pkm2	stk25		cwf19l1
																																				rab3ip		ctsz	arnt	ubl3	abcf2	scpep1	scfd1	actn4	eef1b2	c10orf104		fam60a
																																				nampt		camk2d	gpt2	ndufa10	impa2	agps	robld3	psme4	rheb	acsbg2		spsb4
																																				cnot4		cldn5	cops3	mrps17	eny2	mboat7	cab39l	pias3	rbm25	supt16h		grhpr.2
																																				rraga		ttc33	cope	pi4kb	nrm	clk1	tmem185a	sqstm1	eif1ax	rab27b		ddx56
																																				aldh16a1		nrp1	psmd13	sqstm1	ppp1r1a	polr3e	tspan1	map1lc3a	hnrnpd	pi4kb		setdb1
																																				tax1bp3		rpe65	kiaa0494	map1lc3a	ckm	rptor	golga5	sesn1	eif2s3	gpd1		pc.1
																																				tspan1		slc46a1	ppp2r2a	eef1d	c8g.2	impad1	wdr45	eef1d	tp53	bmp7.1		lsm8
																																				cpsf2		nudt16	eif4a2	myl6	prdx2	bcam	nup35	myl6	tcf3	hsd17b12		atp2a1
																																				mett10d		ada	etfb	gabarapl2	orc6l	rasgef1a	polr2b	gabarapl2	rpl15	pecr		ctdp1
																																				slc31a1		itfg3	eif1b	sdhb	acp1	agpat4	mospd1	gpi	ftmt	hmg20a		gab1
																																				sbds		cbr1	tmem222	ipp	fdx1	ripk1	stk25	sdhb	btg1	c1orf144		smo
																																				smyd5		appl2	npm1	adrm1	st7	ppp2r3b	slc1a5	pgk1	tomm20	cript		med9
																																				luc7l		gzf1	ctsc	cox4i1	wdr75	gcat	narg1	hadhb	capza2	sppl3		cdc45l
																																				llgl2		rfx2	ssrp1	pgk1	nasp	sestd1	dhx15	serinc1	atp6v0c	drg2		mtf2
																																				tspan13		ppp1r14c	slc25a20.2	hadhb	zc4h2	sp2	c20orf30	dcun1d2	cct6a	slc7a3		etaa1
																																				rnf4		seh1l	gcdh	acaa2	cadps	rnf185	nt5dc3	appl1	eif5a	h1f0		cwc22
																																				snx12		pi4ka	gps1	adipor1	c20orf24	med8	nrarp	cyb5r3	nme2	ufd1l		trim28
																																				vbp1		psmb3	smad2	ube2n	tbl1xr1	ccni	tmbim1	fmr1	atf4	cnot8		rbms1
																																				mpst		atp6v0d1	mmgt1	gtf2b	cyb5b	bcl2l2	kiaa0317	acaa2	sfrs18	npepl1		birc5.2
																																				soat1		ube2h	eif6	anxa1	c16orf53	galk1	col18a1	wipi2	id3	rasl11b		pank3
																																				nasp		gca	kpna4	sec14l5	diablo	brcc3	h2afy2	lipe	pdcd6ip	ugp2		rexo2
																																				mlec		rab40b	rpl36	faf2	ctu1	fam129b	tmx1	ubl3	rpl17	rap2b		txnl4a
																																				pigt		chac2	c11orf59	c5orf32	cse1l	map3k7ip1	cpsf2	ndufa10	pdia3	rab6a		lepre1
																																				ccnl1		mrpl43	cdc73	dph5	aldh6a1	otub1	ostf1	ipp	arf4	mpst		ung
																																				pin1		tmem144	rab5a	h1f0	keap1	pppde1	nop16	adrm1	csnk1a1	soat1		e2f3
																																				snw1		tbc1d24.1	chchd2	ubxn1	ggnbp2	ints12	snrnp200	faf2	rap1b	aph1a		c13orf34
																																				vps35		cuedc1	ccng1	blvrb	commd10	pigq	wdr18	nr1d1	rplp1	lrrc59		noc3l
																																				c13orf1		ift57	cyr61	gpm6b	impa1	wdr67	wasl	prnp	psmd8	stau1		aurka
																																				tmem120b		hdhd1a	rab1a	rab4b	camk1	acer3	rela	polr3d	slbp	stom		mat2b
																																				ruvbl2		pelo	psmc3	c13orf1	prmt5	stk38	idi2	ccdc53	ilf2	c19orf6		ccnd1
																																				sptlc2		man1b1	psmc5	sars	abr	tnpo3	ipo9	rffl	ilf3	zfp36l1		utp23
																																				dctn2		sec11c	taf15	nup88	golga5	ddx24	dpysl3	ndrg4	ppp2cb	fbxl5		ccdc58
																																				adss		mettl13	prmt1	rapgef1	bcs1l	sh3glb1	acadm	nek6	actg1	cldn7		slc7a6
																																				sars		znf750	rbbp5	pcmt1	arih2	aars	mett10d	gk2	cd63	prpf4		tm9sf2
																																				tmed4		col3a1	sdcbp	adsl	limd2	aptx	slc20a2	txn2	tubb2c	myd88		zmym2
																																				hpgds		ube3a	rpl21	golga7	sufu	kctd2	kpnb1	ing3	eif4a1	mrto4		nup37
																																				ip6k2		c16orf5	fau	rab7a	c22orf28	prpf38a	slc31a1	tspan7	pabpc1	ubqln4		prkab1
																																				pcmt1		dcn	rps9	rab14	kctd12	ccnh	sdf2	epha2	dnaja2	cwc15		supt4h1
																																				golga7		phyh	amd1	aldh3a2	ttk	utp14a	pdlim1	sox9	rpl24	dpm1		kbtbd2
																																				wtap		otud6b	hadhb	ppa2	slc37a3	top3b	psmg1	fnbp1	itm2a	ythdf3		pemt
																																				rab14		ctgf	eno1	ak2	nek6	smarcc1	c8g.2	stk11ip	eif3d	junb		kifc1
																																				cpne1		ccdc22	tkt	vps26a	gk2	ik	dusp6	stam	ddx21	iars		aurkb
																																				qars		gapvd1	ndufs2	cct2	senp1	dolpp1	ufd1l	atp6ap2	rpl19	slc43a2		mbtd1
																																				aldh3a2		ppa1	vim	dlat	mrpl16	med20	ap1b1	fdx1l	rpl18a	fabp3		mcph1
																																				upf1		smtn	ddx39	wdr1	c11orf58	fam168b	uchl5	mrps2	nptn	cyb5r3		aen
																																				ak2		ccdc77	ard1a	rab3ip	pisd	hbs1l	atp6v0e1	ttc39b	ctsl2	efhd1		spc24
																																				vps26a		fam154b	acaa2	tax1bp3	gemin6	arf6.2	esrp1	ahsa1	ran	chmp4b		c19orf2
																																				cct2		rnf114	iscu	pin1	alcam	gipc2	sbds	gpr137b	rhoa	grhl1		adnp2
																																				wdr1		bub1	etfa	snw1	eif4ebp2	guk1	rcn2	ubxn1	oaz1	ndufab1		suv39h2
																																				lbh		csrnp1	tra2a	vps35	ikbkap	prkrip1	smyd5	lap3	csnk2b	ubtf		twf1
																																				atxn2		apc	slc5a8	dctn2	spin1	mrpl12	snx3	orc6l	eif3a	mobkl1b		dtl
																																				dck		acvr2a	ppp1cb	tmed4	adamts1	ccne1	xpo1	acp1	gnb2l1	yars		arid4a
																																				nmt1		mybl2	prdx6	ppp1cc	gzf1	gnpnat1	egr1	c12orf10	rps2	pld3		hapln3
																																				pard3		rbm24	rbbp7	snx6	rfx2	acp5	stau1	pdhx	ubc	pmp22		uck2
																																				vac14		c7orf60	cox7a2l	mbd1	ppp1r14c	slc37a2	ccnb3	cdc27	hsp90b1	ppp2r1a		depdc1
																																				smap1		tyrp1	yy1	ubac1	mark2	cant1	dcn	mrps12	ccna2	slc35b1		polr1a
																																				alg6		trip13	psma7	xpo7	ankrd13a	e2f4	llgl2	fktn	rps14	nmt2		dus4l
																																				wipf2		usp47	ndufs1	h2afy2	myh9	ssr4	luc7l	whsc2	rps18	ap2s1		wdr51b
																																				lrrfip2		eif2b1	cebpd	aldoc	gmds	ctbs	uba5	c14orf133	rpl3	mknk2		gtf3c6
																																				dullard		josd2	ccnl2	atic	tmem49	lmo7	fbxw8	tdrd7	btf3	mpp1		polr2j
																																				tmem192		brd1	sparc	kdsr	tp53rk	mfsd11	men1	ints8	rps23	pomp		lrrc1
																																				nuf2		cxcr7	rad23b	commd8	sptlc1	rnf111	ngdn	st7	rps25	psma4		pld6
																																				eif4ebp2		gpr146	cd2bp2	elovl1	sppl2b	tmem39a	dmap1	xrcc6	marcks	tob1		med22
																																				dgcr2		tnfaip1	arcn1	aldh9a1	c18orf25	akr7a2	tmem85	znf330	rpl12	psme4		klhl12
																																				mysm1		znf592	rpl14	snx17	ttc39b	foxp4	ubqln4	prmt3	fgfr1	ube2h		bax
																																				stambp		pitx2	kars	prkd1	c3orf75	cwf19l2	memo1	herc4	tmem126a	tsc22d3		chtf18
																																				atf1		gosr2	nckap1	atp5h	rbm24	golt1b	psmd14	chuk	id2	cul1		polr1d
																																				cbfb		fam175b	ahcy	tsc22d3	c3orf26	c12orf32	c7orf41	vezt	h2afz	znf207		tstd2
																																				zc4h2		fst	c19orf47	lims1	wbscr22	spryd4	plxna1	blvrb	hmgn3	rps28p9		lemd3
																																				erf		c11orf2	tubb	rgs2	lztfl1	endog	dpm1	wdr75	nop58	adipor1		ap3b1
																																				stk3		palm	lypla2	etfa	rwdd4a	plcb3	nip7	nufip1	ccdc50	mmp14		kiaa1715
																																				pcbd1		pygm	mgrn1	dpysl3	adk	eif4g1	cherp	stk39	sfrs5	nipsnap3a		abt1
																																				rpa2		tars	arglu1	uba5	mib1	smc2	lsg1	igbp1	nucks1	ccdc77		ppm1d
																																				dbn1		alg2	cct3	rwdd1	myf5	rgs19	acat1	larp1	clgn	mrps7		dedd
																																				hmg20a		hsp90aa1.1	epb41	mobkl1b	dnmt1	sqrdl	mgat1	rab3ip	znf326	nthl1		c21orf57
																																				hsdl2		cnrip1	hspd1	maea	map2k7	zfp36l1	ssr4	tax1bp3	nop56	srrt		ap4s1
																																				nup88		cpe	ube2a	zfp36l2	fuca1	bco2	plod3	cpsf2	hnrnpa1	tmem194a		slc16a6
																																				sh3glb2		lpin2	impdh2	tbrg1	eif2b1	rnf20	gpr107	slc31a1	rps3a	pdcd4		emp2
																																				nova1		fam102a	gpnmb	oxr1	cox17	abcf2	ugdh	sbds	mthfd2	smg7		nmd3
																																				socs6		mrpl11	csnk1e	nxn	chid1	unc50	cndp2	tspan13	hnrnpab	capza1		glipr2
																																				atp6v1b2		fen1	glud1	mrps7	mkl1	ncl	ip6k1	rnf4	sec61a1	mrps17		nup107
																																				acox1		bmi1	psmc2	shmt1	kdelc2	cab39	pcyt2	mpst	sfrs3	ap1g1		bcat2
																																				phf1		capn2.2	slc16a3	brp44	bet1	xab2	ammecr1	nasp	hnrnpa2b1	arrdc2		zfp36l1
																																				dera		hint1	acsl1	ppm1g	sh3glb2	c17orf48	pip5k1a	mlec	p4hb	ubap2		rgs19
																																				spred1		zbtb5	ndfip1	arrdc3	nova1	ddx54	ube2j2	pigt	sfrs2	fos		sqrdl
																																				iqgap1		kpna6	eif3h	psmd14	cuta	idh3g	rab21	pin1	eif4g2	becn1		bco2
																																				tubb2b		edem1	lsm12	fbxl5	c14orf133	scfd1	cdk2	snw1	eef2.1	uba3		ddx51
																																				dlx6		git2	rbm39	c12orf57	smap1	mars	c12orf41	vps35	tpt1	mgat2		gnl3l
																																				ikbkap		rbm19	ptma	ppap2a	daxx	kalrn	cox7b	c13orf1	hnrpdl	rnf25		zic1
																																				atp6v1a		nubp1	reep5	psmb2	zcchc4	serinc1	tomm70a	sptlc2	cirbp	clk2		npm2
																																				spop		asrgl1	cct5	cpsf6	wfs1	dcun1d2	cpsf3	dctn2	grasp	arpc3		sfrp2
																																				rtn2		c1orf21	eif3l	cops8.2	vps18	c6orf136	jund	adss	c10orf119	c7orf42		ppie
																																				cdc42ep4		atp13a1	dvl3	ddx19b	fuca2	appl1	irf2	sars		cast		gjb6
																																				gli3		slc41a2	xbp1	elf2	higd2a	sdhb	cdc40	tmed4		lgmn		fzd3
																																				arsa		ppfibp2	brp44l	tpp2	med4	psme4	rpn1	hpgds		ywhab		bat4
																																				nt5dc1		ryk	c16orf72	fip1l1	tyw3	pias3	c10orf58	pcmt1		vezf1		tcp1
																																				st8sia1		dzip1	dcaf11	gtf2h4.2	prrc1	cyb5r3	fuca1	golga7		gnl3		abcf2
																																				lmx1b.1		smad6	hmgn1	sirt5	pias4	fmr1	gcat	wtap		erlec1		scfd1
																																				lig3		med4	ndrg2	tmem59	mett10d	gabarapl2	ccni	rab14		zfp36		ddx54
																																				sirt4		sec11a	atp5c1	birc2	ppp2r5a	pgk1	pnpo	aldh3a2		actn4		pwp2
																																				wbscr16		prmt10	coro1c	ppp2ca	ift20	hadhb	zc3h10	ak2		rab2b		c7orf41
																																				tle4		etv1	hgs	loc646644	epn2	acaa2	pygl	vps26a		ranbp9		akr1b1
																																				stk24		edem3	atp1b1	pum1	lsr.1	wipi2	tcta	cct2		atp6v1b2		wrb
																																				lrrc47		higd2a	fgf8	etf1	kiaa0174	sesn1	pias4	wdr1		pfkm		chst2
																																				scamp3		tyw3	ndufa9	hspa4	phgdh	gpi	wfs1	lbh		ifrd1		pwp1
																																				hyal2		prrc1	got1	med25	mcfd2	lipe	mfsd11	lig3		snai2		scmh1
																																				jmjd6		lars	itgb1	ppm1a	seh1l	robld3	golph3l	sirt4		derl1		ccnk
																																				bccip		slc25a1	rpl31	pgrmc2	pi4ka	lgmn	ppp1r13l	wbscr16		api5		sip1
																																				pmpcb		donson	eif5	ivns1abp	kiaa0892	ubl3	cfp	tle4		mtpn		col18a1
																																				ppp1cc		alg8	dazap2	fxr1	rnf11	ndufa10	myl9	stk24		cul4b		ufd1l
																																				snx6		gatad2a	phb	slc2a1	tor2a	sqstm1	wbscr22	lrrc47		cebpb		c12orf41
																																				mbd1		coq10a	psmc1	nop16	slc25a30	map1lc3a	c11orf2	cbfb		hbs1l		tomm70a
																																				aspscr1		fam100b	eif3i	eif2b2	arrdc2	eef1d	slc25a12	dbn1		cbx3		cfp
																																				ubac1		usf2	prdx1	eftud2	clpx	myl6	tspan13	scamp3		csnk2a2		klhdc4
																																				xpo7		nkrf	metap2	farsa	atg4d	ipp	cav2	hyal2		actr10		psen1
																																				nmt2		anapc10	hmgb1	prkcsh	c13orf15	adrm1	rnf4	jmjd6		pccb		copg
																																				dhrs4		ppt2	pno1	rab2b	supt3h	gtf2b	copb1	bccip		psma6		timp3
																																				eml4		syngr1	rpl23	cdc37	exosc7	anxa1	ptpra	pmpcb		agfg1		fbln1
																																				rnf2		rint1	psmd2	adh5p4	mcm4	sec14l5	utp15	nup88		xrn2		slc35b2
																																				dnajc9		tspyl2	sar1a	extl3	cdca8	faf2	srpk1	ppp1cc		cstf2		coq7
																																				sfxn1		etv3	cs	snrpb2	crkl	nr1d1	ero1lb	snx6		prkag1		c3
																																				abhd3		ppp1r3b	fn1	ctr9	ddb1	prnp	slc25a30	mbd1		copa		spcs2
																																				rnf5		ndufa6	dlst	smarcb1	ndc80	kiaa0247	grsf1	aspscr1		herpud1		kiaa1310
																																				c1orf66		rala	rnf10	bub3	kdelr3	pgrmc1	snx12	ubac1		idh3b		sephs1
																																				hipk1		wdr5	g3bp1	sap130	nr2f2	polr3d	slc25a39	xpo7		idh3a		plk2
																																				zfx		lpar1	rpl10a	c1orf55	rara	ccdc53	ppat	nmt2		tsg101		creb3
																																				r3hdm2		ppp1r8	serbp1	frs2	ggps1	rffl	mgst3	dhrs4		ctsd		cep97
																																				cadps		pgs1	pdha1	drap1	vps11	ndrg4	kank1.2	eml4		ucp2		rs1
																																				c20orf24		nr2f6	nnt	kiaa1826	zcchc8	myh9	tpd52	rnf2		ltv1		efnb2
																																				tbl1xr1		hprt1	rbm22	stard7	ube2c	lap3	sav1	dnajc9		anxa1		ddx55
																																				daxx		ankrd12	eef1b2	cox4nb	lrwd1	ubxn1	prkaa1	sfxn1		cry1		pcnp
																																				dtymk		trim36	rps15	sncg	mex3b	eomes	eif2b2	abhd3		tmx2		hat1
																																				tubg1		f2	rpl32	c11orf60	gtf2e1	znf330	nipsnap3a	rnf5		mkl1		hdac6
																																				cd2ap		prkcd	rpl9	slc30a9	mmadhc	cpsf2	nfil3	c1orf66		rmnd5a		rfx5
																																				stard3		vill	skp1	mtx1	csrp2	mlec	nmd3	vac14		psmc6		stx6
																																				brms1l		stambp	rps11	memo1	igsf3	lig3	ccdc77	wipf2		sec13		pax6
																																				znf259		fa2h	rps26	pcyt2	rnd1	sirt4	arhgap21	hipk1		ddx47		c19orf52
																																				tipin		polr3c	rps13	slc25a39	pdcd11	wbscr16	bhmt	zfx		dlat		exosc2
																																				arhgef12		gata3	sae1	c7orf42	cbx1	tle4	rcan1	r3hdm2		aldh2		efna3
																																				nusap1		stx18	hdgf	ubl7	cmbl	stk24	stoml2	zc4h2		cdc42		lrrc14
																																				rcbtb2		actc1	fxr1	pdcd4	ddah2	aldh3a2	dbnl	cadps		pcna		arfrp1
																																				stk40		mylpf	eif2s3	tmem128	med15	ak2	snrnp70	c20orf24		prdx3		mrps24
																																				kif4a		glrx5	vdac1	exoc7	klf8	vps26a	aqp3	tbl1xr1		tmem59		mapk12
																																				vdac3		atp2a2	eif3c	med27	pds5b	lrrc47	apoo	smap1		ndufa10		tmem53
																																				tmem150a		pkp4	tuba1c	ppfia1	klhl18	hpgds	pycr1	daxx		smarcd1		rnf20
																																				kptn		sympk	tuba1b	ldb1	supt4h1	larp1	hsd17b12	dtymk		ptbp1		c9orf114
																																				porcn		trim29	hnrnpu	gxylt1	kbtbd2	slc31a1	atp5h	dgcr2		mvp		mars
																																				strn		ccnb2	nat13	kiaa0182	cxcr7	rnf4	sfrs13b	tubg1		psmd4		xab2
																																				morg1		cdt1	fus	ubqln4	efnb2	adss	c7orf23	stk3		timm17a		ncl
																																				mllt10		hmbs	rps3	arrb2	pitx2	wtap	zfr	pcbd1		clock		dmap1
																																				sncb		xiap	gltscr2	dnajc19	pwp1	cbfb	rngtt	cd2ap		klhdc4		slc25a24
																																				chga		lhx5	srp72	ndufab1	fzd3	dbn1	clcn3	stard3		fscn1		idh3g
																																				als2cr4		aldh1a1	ftmt	rps28p9	ddx55	scamp3	gtf2b	brms1l		sf3a1		unc50
																																				nsun4		map1lc3b	hsp90ab1	rpl35a	ppp6c	hyal2	pgrmc1	znf259		sf1		cab39
																																				smug1		utp6	btg1	eif2b3	c9orf80	jmjd6	cript	tipin		des.1		c17orf48
																																				whsc1		orc3l	tomm20	atp5d	elavl1	bccip	fgfr2	arhgef12		akr1b1		kalrn
																																				c2orf24		fkbp9	capza2	sf3b2	c4orf43	pmpcb	cybrd1	nusap1		cdk2ap1		ass1
																																				med17		mcm6.2	atp6v0c	thbs1	dhx15	nup88	vbp1	rcbtb2		bcas2		pak1
																																				lig4		spc25	cct6a	denr	brd3	pcmt1	drg2	stk40		ppp2r1b		dpp8
																																				gabpb1		ints2	eif5a	des.1	sox13	golga7	h1f0	kif4a		ogdh		purb
																																				ap4m1		exosc10	cfl1	syf2	phf5a	cct2	slc39a9	vdac3		adrm1		gldc
																																				yipf4		mad2l1	hspa9	gsn	zbtb44	wdr1	cnot8	tmem150a		cabc1		ddx59
																																				fa2h		otx1	scp2	psma3	fubp3	pin1	prcc	kptn		psen1		zfyve1
																																				snx9		snip1	ddx3x	sgk1	fzd7	snw1	peli1	porcn		snrpc		lrrn1
																																				rit1		pola2	wsb1	cdknx	sirt6	dctn2	errfi1	strn		ppap2a		zic3
																																				polr3c		tmx1	uqcrc2	rpl28	nat11	tmed4	soat1	morg1		marcksl1		gbx2.2
																																				gata3		atp6v0e1	timm23	rpl18	cobra1	ppp1cc	drg1	mllt10		zfand6		arpc5l
																																				stx18		nip7	idh2	rpl22	eif2c2	snx6	gpd1	sncb		dbr1		ror2
																																				tbk1		srpk1	ldhb	rps16	polr1e	mbd1	rbm4b	chga		ola1		rpl38
																																				fam49a		tmem39b	rheb	suclg1	sap18	lbh	mpst	nmt1		siah1		kiaa0195
																																				itgav		rhebl1	nme2	gpt2	dnal4	aspscr1	c7orf42	als2cr4		mdh2		ccdc6
																																				yipf6		cks2	atf4	eno1	nup43	blvrb	ubl7	nsun4		psmd6		peli2
																																				tfcp2		prc1	txndc5	cebpd	snrnp40	c13orf1	gtf2h1	smug1		cnbp		mcm8
																																				gnai2		lrrc8e	rps19	polr2f	rbm26	sars	arpc3	whsc1		cdo1		foxn2
																																				atg4c		sall4	eif3k	metrnl	slc35e1	rab14	gipc2	c2orf24		sesn1		lmnb2
																																				cltb		fbxo5	csde1	tmem14b	hs2st1	rab3ip	wdr77	med17		arpc4		mtmr4
																																				c16orf13		armc1	rbm25	rnf7	snrpf	tax1bp3	dimt1l	lig4		eef1d		numa1
																																				elf1		lyar	atp5f1	actn1	sap30bp	vps35	rnmt	enoph1		srp54		ncapd3
																																				hdac2		tspo	pkm2	gtf2h1	c1orf156	ubac1	vps28	ncoa2		wnt8a		gas8
																																				pld3		ccne2	hdlbp	kiaa1026	blzf1	xpo7	jagn1	dpysl3		gars		ptprd
																																				rnf13		ncaph	rpl27	cox7b	cdc25c	nmt2	tomm40	uba5		c5orf32		lpgat1
																																				itpk1		osgep	tmed2	taf9b	polr2h	dhrs4	pcm1	drg2		tram1		tbx1
																																				msl3		upk1b	eif3m	cops3	rbm12	eml4	sppl3	tsc22d3		ptp4a1		cybrd1
																																				fam108a2		dbf4	id3	rbm17	cetn3	rnf2	tprg1l	rgs2		zmiz2		bmp2
																																				akt1s1		racgap1	rpl17	tnfrsf10b	znf740	dnajc9	rasl11b	etfa		caprin1		dvl2
																																				rragc		nid1	rps10	bckdhb	sfrp1	sfxn1	nasp	htra1		ppid		ccnb3
																																				cdca4		btrc	rps12	sdf2	eprs	abhd3	kdm2b	acad9		thbs1		bmp7.1
																																				sdf2l1		rbms1	rpl13	tmpo	gnas	rnf5	cwc15	slc25a29		sod2		prelid1
																																				dusp12		birc5.2	rps7	nol10	kank1.2	vezt	eftud2	ttk		hsbp1		myh9
																																				snx14		pank3	pdia3	hpgd	gmfb	c1orf66	ugp2	rad9a		pax7		hoxb4
																																				myh10		rexo2	rpl27a	cebpa	cnot10	rap2a	dapk3	ermp1		cdc34		igfbp5
																																				c9orf72		txnl4a	elof1	parvb	tmx3	mri1	c6orf136	cops7b		c7orf20		gata2
																																				sh3gl1		lepre1	arf4	ube2m	camlg	men1	derl1	atl2		alkbh5		fgf20
																																				ube2d4		ung	csnk1a1	apoo	dis3l	htra1	junb	ap1b1		app		fnbp1l
																																				stard10		e2f3	calm2	ndufaf4	zranb1	drg2	cxadr	efhd1		tmem147		zdhhc6
																																				kiaa1324l		c13orf34	psap	clns1a	erlin2	dcun1d5	zcchc10	ap1g1		adss		snx2
																																				ctdspl		noc3l	rplp1	mtpn	ephb3	klhdc3	tbrg1	pip4k2a		ywhah		rab8b
																																				rab11fip2		aurka	rap1b	mtch2	gemin8	acad9	akr1a1	gas6		glrx3		fbxo42
																																				nfe2l1		mat2b	hnrnpd	ndufb10	ncapd2	lims1	tsr1	ankrd13a		tpm1		gstt1
																																				mrps9		ccnd1	tuba4b	bat1	lonp2	etfa	mapk11	cry1		ube2l3		cul3
																																				prpf4b		utp23	actl6a	hk1	bcat2	dpysl3	acvr1	pafah1b2		pdia6		cox17
																																				ckap5		ccdc58	rpl7a	myd88	tcp1	rwdd1	fabp3	vopp1		gyg1		rsrc1
																																				prr12		slc7a6	ywhae	zranb2	pcnp	mobkl1b	eif4h	gpd1		jup		h2afy2
																																				usp1		tm9sf2	slc20a1	c1orf128	osr1	maea	zfp36l1	tpp1		syncrip		dlat
																																				cbx5		zmym2	got2	rangrf	sh3bgrl2	agpat1	smad1	arx		copg		hadha
																																				nova2		supt4h1	gadd45g	hipk2	ctnna1	atp5h	ndufaf4	dtx2		sars		stip1
																																				gins3		kbtbd2	mdh1	aph1a	mfap3l	tsc22d3	gmeb1	commd5		gabarapl2		pnrc2
																																				mtm1		pemt	rpl15	hsbp1	ptgr1	rgs2	ndufab1	cask		cbs		aldoa
																																				map3k7		kifc1	sfrs18	rab11a	lars	uba5	aftph	dcaf13		shmt2		chchd4
																																				smcr7l		aurkb	ppp2cb	copb2	c11orf2	slc25a29	mlec	alg1		tbx2		eif2b4
																																				psmd9		mbtd1	actg1	nfkbia	aldh7a1	enoph1	fkbp1b	ndst1		ppap2b		ptpra
																																				hif1an		mcph1	cd63	c3	nubp1	ncoa2	ythdf3	mtus1		hpgds		tpd52
																																				orc1l		spc24	tubb2c	uqcrfs1	c1orf21	sh3bgrl3	herpud1	lztfl1		arl1		stoml2
																																				c11orf10		c19orf2	eif4a1	dcaf7	atp13a1	golph3l	ppp2r1a	trmt2a		pdk4		fgfr2
																																				tmem38b		adnp2	pabpc1	cdv3	slc25a1	acp2	pmp22	camlg		dci		ppp2r1a
																																				fgfr1op		suv39h2	dnaja2	npm1	donson	ap1b1	rsrc1	ppm1l		anxa7		prdx3
																																				dnajb9		twf1	rpl24	mmgt1	alg8	ap1g1	poldip3	ccdc109b		elovl1		aldoc
																																				ccdc61		dtl	itm2a	eif6	gatad2a	pip4k2a	oaz2	slc7a7		rdbp		cap1
																																				rassf7		arid4a	eif3d	gpnmb	sdad1	efhd1	idh3a	kpnb1		gpt2		atic
																																				lhx5		hapln3	ddx21	csnk1e	rpl38	gas6	lrrc58	memo1		arfgap1		actr10
																																				c11orf58		uck2	rpl19	c7orf41	stambp	rhob	iars	psmd14		mta2		tpm1
																																				spin1		depdc1	rpl18a	psen1	vill	srp68	dcaf12	pcyt2		cnn3		birc2
																																				ppp2r5a		polr1a	pcbp3	copg	sympk	gpd1	zhx3	ppp1r13l		denr		acadl
																																				ift20		dus4l	slc25a3	spcs2	cdt1	tpp1	slc35b1	copb1		sf3a3		rab7a
																																				clpx		mesdc2	rplp0	kiaa1310	hmbs	ip6k1	acaa1	slc25a39		txnl1		chchd3
																																				atg4d		tmem11	rpl6	sephs1	psme3	gtpbp5	anxa1	c7orf42		irf2bp2		pls3
																																				nr2f2		akr1a1	rpl8	creb3	trmt5	arx	pigt	ubl7		brd7		arl6ip1
																																				rara		syap1	rps6	cpsf7	utrn	klhl18	irs4	pdcd4		cebpg		ppa2
																																				tmem50a		spty2d1	atp5a1	plxna1	gns	dld	pomp	ppap2a		etf1		rac1
																																				gpn3		tgif1	rpl7	gmeb1	dhrs12	asna1	mettl14	rnf25		pck2		rab2a
																																				xrcc1		sap30	rpsa	lrrc58	anp32b	atp6v1h	tmx2	shmt2		mbd3		cct4
																																				mrps16		znf410	rsl24d1	rqcd1	rpia	med27	ncln	tmem128		gtpbp4		rtn3
																																				mxd3		bcat2	rps27a	siah1	srm	actr1a	yif1b	exoc7		rab14		ccng1
																																				hspe1		gnl3l	eif1ax	cd82	hmg20a	ahcy	cebpa	sirt5		nucb1		cyr61
																																				slc25a25		kcnk6	cct8	hmgcr	utp14a	ccdc109b	rwdd1	actr1a		psmd12		slc5a8
																																				cenpv		mrps24	nptn	dazap1	top3b	shmt2	prdx3	tmem59		adsl		cox7a2l
																																				mrpl41		ppie	ctsl2	ctsd	smarcc1	acly	sema6d	acly		cdc73		polb
																																				ndufs5		mapk12	ran	bap1	ik	smox	gtf2f2.2	ivns1abp		bcap31		enpp2
																																				mmp15		dmap1	rhoa	kdelr1	dolpp1	anapc4	casp3	klhl18		mgmt		arrb2
																																				prkacb		zic1	oaz1	nhp2l1	med20	g3bp2	gns	dld		pls3		ndufa9
																																				prdm12		sfrp2	ogt	anxa11	fam168b	nol6	pin1	asna1		ppp1r11		got1
																																				cdc25b		bat4	hmgb3	mxi1	ifrd2	shpk	ccnl1	atp6v1h		sqstm1		flot1
																																				elavl3		lrrn1	ddx5	ppp2r5e	gins4	ercc5	ppfibp2	med27		map1lc3a		spns1
																																				c7orf25		zic3	cops2	qki	st3gal6	ivns1abp	adam10	ahcy		qars		sulf2
																																				tsc22d2		gbx2.2	gnb2l1	ube2e3	thg1l	memo1	apool	smox		cd82		map2k7
																																				mapkap1		rpl38	rps2	nutf2	tmem115	c7orf42	snw1	anapc4		rab11a		c10orf104
																																				trim62		ccdc6	psmd8	kti12	loxl1	pdcd4	trip12	g3bp2		atp5g1		thul16
																																				phc2		peli2	pfn2	thoc7	srpk1	ppfia1	timm17a	nol6		zc3h11a		nf2
																																				tfip11		traf6	slc7a8	rnaseh2b	supt5h	ldb1	rab27b	shpk		ctdspl2		kdsr
																																				tbc1d7		retsat	gdi1	arfgap1	btrc	kiaa0182	nvl	ercc5		copb2		commd8
																																				hs3st1		zeb1	ilf3	nfya	tmem39b	vti1a	ctbs	ppfia1		zfand5		rapgef1
																																				fam54b		arl4c	eif3a	hes1	fkbp9	psmd14	sec14l5	ldb1		psma1		stau2
																																				dnm2		mcm8	ubc	slc9a3r1	mcm6.2	ppap2a	vps35	kiaa0182		chchd3		gpm6b
																																				myst2		rabac1	rps14	mrpl3	atp6v0e1	sirt5	tsc22d3	vti1a		dars		rab4b
																																				fkbp3		dcaf6	rps18	arpp19	ccne2	tmem59	pecr	gxylt1		hnrnph3		nrip1
																																				blvra		glo1	rpl3	tmem101	ncaph	pcyt2	trappc3	dctn5		hspa8		wasf1
																																				pebp4		pcif1	btf3	rxrb	upk1b	slc25a39	aldoc	asb13		gsn		klf11
																																				gpr137c		rab21	rpl5	cnih4	pemt	ubl7	ap2b1	ube2k		psmc4		dctn1
																																				thumpd2		slc25a12	eef1g	yrdc	kifc1	tmem128	c13orf1	fam20b		vps4b		ppp3cb
																																				tmc6		fabp3	rpl10	vps4b	aurkb	exoc7	msn	pafah1b3		ilk		acat1
																																				cryzl1		echs1	rps5	thoc1	mbtd1	gxylt1	aimp1	suclg2		rgs2		vps28
																																				dnajb13		slc30a5	atp5b	mvp	mcph1	dctn5	tmem120b	comt		akirin2		cast
																																				c2orf56		actn4	naca.2	hm13	prdm1	asb13	pdcd4	wdr70		cdv3		atp5d
																																				fancg		txn2	rpl13a	smg7	timp3	ube2k	vps29	esd		riok3		cdo1
																																				abcg2		ing3	rps23	pdlim1	fbln1	commd5	efr3a	naaa		flot1		lass3
																																				ogdhl		tspan7	rpl11	prkaa1	tmem66	copb1	phactr4	ttyh2		lamp2		gsn
																																				cluap1		stam	csnk2b	snrpd3	psmd3	fam20b	rpl35a	st3gal3		srd5a1		actn1
																																				phf12		atp6ap2	anxa5	zmat5	zmym4	pafah1b3	mrps7	c14orf21		tmbim6		alas1
																																				stx7		arg1	hsp90b1	gtf2a2.1	prpf3	suclg2	syvn1	taok2		dcaf7		rpl18
																																				luzp1		mex3c	rps25	lsm5	cnot8	comt	uba3	leng8		smn2		suclg1
																																				ganab		ddx18	rpl12	parn	carm1	wdr70	ppap2a	c3orf26		cops5		gpt2
																																				dcun1d3		acot2	dag1	c1orf144	ftsj1	esd	ppp1r14b	rwdd4a		myl6		cebpd
																																				prdm4		fzd8	ywhaq	prdx5	stim1	slc7a7	becn1	adk		tbc1d10a		cidec
																																				chst11		gpr137b	plin2	rps21	rad21	ppp1r13l	bmp7.1	dis3l		snrpb		ube4a
																																				stk10		orc6l	cox5a	slc25a17	stam2	naaa	arrdc2	xpr1		psmd1		des.1
																																				rabl2b		acp1	magoh	psma6	sip1	ttyh2	rnf25	rbm9		atp1b3		aldh7a1
																																				phkg2		c12orf10	tmem126a	cgnl1	slc25a12	myl1	prpf6	stk11		rplp2		gpd1l
																																				setd1b		fgf13	lamp1	ergic2	rab21	timm44	hdac1	erlec1		lass3		trim33
																																				xylt1		mrps12	nop58	cops6	arg1	cidec	acsbg2	uchl1		lsm2		echdc1
																																				ei24		fktn	arpc1b	riok3	unc50	lass3	farsa	mtmr9		ube2g1		dazap2
																																				armc9		tdrd7	sfrs5	bnip3	ppp1r15b	fbxo42	cdk9	ndufb3		atp6v1c1		tbrg1
																																				man2c1		ints8	tpi1	uqcrc1	ncl	ube4a	acp5	cyth1		hadha		cdk9
																																				vcan		st7	cycs	ctsc	smc1a	des.1	cast	ppp1r13b		prpf18		ncbp1
																																				ctns		prmt3	clgn	tkt	erh	gsn	rqcd1	phldb1		tceb2		kiaa0892
																																				urod		wdr75	nop56	ndufs2	e2f8	sgk1	c20orf43	psenen		chrd		smad1
																																				supt7l		nufip1	ssr2	vim	cldn6.2	cdknx	fbp1	tmem93		gspt1		ggcx
																																				wibg		igbp1	nucks1	iscu	med30	suclg1	dbr1	hsf2		alas1		mthfr
																																				dimt1l		tspan13	vdac2	ndrg2	ccnk	gpt2	ica1	stx5		gpi		ube2c
																																				rbm17		mpst	ppdpf	atp5c1	akr1b1	cebpd	echs1	tmcc1		thrap3		hscb
																																				cenpa		nasp	eif3b	atp1b1	hat1	actn1	oxr1	dhcr24		akirin1		lrwd1
																																				slc30a1		pigt	rps3a	got2	hdac6	gtf2h1	ruvbl2	gnao1		sdha		farsb
																																				chd4		sptlc2	znf326	zdhhc3	rfx5	gstt1	c9orf78	atg4b		sub1		mtch2
																																				serpine2		dgcr2	rpl37a	pnpo	esrp1	atp5d	ywhab	rab3a		cops6		myd88
																																				c1orf144		zc4h2	psma2	msn	drg1	thbs1	creb1	ahcyl2		arnt		cabc1
																																				utrn		stk3	rbm5	atp6v0b	sec24d	rpl18	gnl3	unc119b		gcdh		nvl
																																				cebpz		pcbd1	hnrnpab	gars	wdr46	eno1	slc30a5	tmem111.2		itgb1bp3		aimp1
																																				taf9b		cadps	sfrs2	bcap31	fam82b	cast	slc7a3	lrp2bp		psma3		mrps7
																																				utp18		c20orf24	eif4g2	mknk2	cab39	dhrs12	psmb2	mtap		cdh1		tram1
																																				tnfrsf10b		tbl1xr1	sfrs3	efr3a	dmap1	anp32b	psmd6	mtx2		myod1		shmt1
																																				snapc1		dtymk	hnrnpa2b1	mmp14	traf6	rpia	banf1	fgfr3		cd81		parvb
																																				dph5		tubg1	ddit4	pex19	prcc	srm	eed	taf9		psmd7		kdelr2
																																				rhob		cd2ap	eef2.1	psma4	snrpa1	ngdn	dph5	stambpl1		psmb1		ube2m
																																				sgsm3		stard3	tpt1	atpif1	tyk2	prkag2	sgta	agpat3		ctnnd1		cpvl
																																				srp68		brms1l	rps20	ifrd1	kiaa0195	rbmx	api5	mospd2		ppa2		lrig3
																																				gtpbp5		znf259	hnrpdl	tpm1	serinc1	imp4	e4f1	prmt7		arf5		ppm1g
																																				slc22a5		nusap1	myc	atp5g1	hbs1l	spry2	pccb	tbp		psma5		pon1
																																				rhou		rcbtb2	cirbp	zc3h11a	wbp4	surf6	lgmn	myl1		hspa4		apoo
																																				dhcr7		stk40	hnrnpa0	acadl	arf6.2	acadm	aph1a	gtf2h1		slc25a20.2		slc39a9
																																				efr3a		kif4a		psma1	gipc2	ano5	rps6kb1	ugp2		pcmt1		ndufaf4
																																				slc39a7		vdac3		chchd3	guk1	sf3a3	stom	thbs1		syf2		cpsf4
																																				scamp2		tmem150a		pcna	prkrip1	fkbp4	agfg1	sgk1		pax2		ndufb10
																																				tmed9		kptn		arl6ip1	rbm42	strap	zfp36	cdknx		pnrc2		thg1l
																																				pdcd6ip		porcn		hadha	dtymk	sdf2	psma6	eno1		golga7		obfc1
																																				rap1b		strn		tceb2	ints8	smad1	sptlc2	timm44		aes		vars
																																				clgn		morg1		aldoa	dgcr2	plod3	map1lc3b	cuta		ssb		nudcd1
																																				slc25a17		mllt10		rac1	tubg1	ammecr1	actn4	pcolce2		tmem222		fbxw4
																																				gmppb		sncb		sucla2	hey1	rrbp1	cpsf6	fstl1		krt5.7		hcfc1
																																				tbl2		chga		rtn3	dcun1d2	ggcx	yrdc	krt12		sfrs9		igsf3
																																				slc10a7		gpx3		ssrp1	cdk2	cops3	prpf4	rpe		tll1		top1.1
																																				tbrg4		gmppa		rpl36	mfsd5	tmpo	prkag1	nup155		ensa		sec16a
																																				ncapg		arf3		chchd2	txn2	nol10	coq6	dhrs12		ppm1a		ddx52
																																				slbp		rgp1		ccng1	ing3	bckdhb	sod2	exosc7		csnk1e		brd3
																																				dhx9		fam107a		cyr61	tspan7	hpgd	ccar1	ifrd2		ap1m1		rnd1
																																				khsrp		cyb5b		tra2a	ddx18	rpe	cops8.2	syngr2		fam48a		carm1
																																				ccna2		eif4e3		slc5a8	gale	nup155	idh3b	gins4		rpl34		polr2i
																																				c17orf85		rfc5		ndufa9	pds5a	fut8	cebpb	anp32b		sox3		rrs1
																																				dvl3		bre		got1	u2af1	loc419599	dctn2	mcm4		rab7a		mrpl21
																																				zswim4		cnot7		rpl31	epha2	thg1l	cap1	bckdhb		sdhb		hist1h2bo
																																				hk1		ndrg1		rpl23	fbxo45	nmd3	ddx19b	acadm		rbm8a		tmem184b
																																				epb41l3		sike1		tmx2	slc20a2	cpsf4	hbs1l	sdf2		paip2b		arrdc1
																																				csnk1g1		c22orf13		clk2	cttn	ndufaf4	efhd1	ngdn		aldob		trib2
																																				cops2		amotl1		lsm2	wdr45	ndufb10	hspa5	cherp		tuba4a		thap1
																																				ahctf1		ube2f		sat1	prrg1	myd88	lmbrd1	plod3		phb2		casp6
																																				tuba1b		tgfbr1		sf3b4	rabgap1l	pon1	elf2	ammecr1		cyr61		sin3b
																																				krt8		pam		cnih	tsr1	apoo	phyh	zhx3		lhx1		snupn
																																				cct5		c19orf63		c12orf11	frmd8	mtch2	adss	prkag2		ppp2ca		gpr172b
																																				isyna1		slc25a10		c1orf52	bckdk	cabc1	tmem147	rrbp1		gnl2		sox13
																																				col4a3bp		blmh		taf12	oaz2	obfc1	chmp4b	sf3a3		rpl35		sec23ip
																																				rab27a		znrf1		ppp2r1a	xab2	glipr2	gnai3	rpia		rpl36		acbd3
																																				prkci		tmbim1		prdx3	c17orf48	supt5h	dnajb12	srm		anxa11		phf5a
																																				dact1		wasl		cap1	nup35	timp3	mobkl1b	rbmx		metrnl		brd4
																																				fgf8		rcan1		pnrc2	efna4	fbln1	slc25a24	imp4		bnip3		phf13
																																				alad		clcn3		flot1	necap1	tmem66	cgnl1	spry2		scamp2		pdcd11
																																				kcnab2		aftph		gata4	aass	psmd3	usp25	surf6		hgs		mmadhc
																																				foxc1		pccb		mapk8	ddx1	zmym4	gosr1	ano5		ncor1		usp22
																																				ppard		agfg1		glrx3	pdcd10	prpf3	hsd17b10	fkbp4		pgk1		rer1
																																				fbxl20		coq6		dazap2	cul3	cnot8	sars	strap		ranbp1		rbm7
																																				bcam		ethe1		gpr177	znf330	carm1	copa	cops3		nhp2l1		atg16l1
																																				nsdhl		anxa7		slc44a2	cpsf2	ftsj1	ggnbp2	tmpo		cct7		spats2
																																				mccc1		ppp1r11		dag1	mlec	stim1	wdr61	nol10		arl6ip1		cbx1
																																				phactr1		amfr		psmd6	lig3	rad21	adipor1	hpgd		pafah1b1		zic2
																																				gosr2		serinc3		chmp4b	c10orf104	stam2	tsg101	fut8		cltc		sh3bgrl2
																																				fam175b		c16orf53		usp25	zmpste24	sip1	shmt2	loc419599		anxa2		mettl9
																																				fst		rap1a		psmc4	mapk11	ube2v2	ethe1	sesn2		pfn1		nat12
																																				foxo3		kiaa1012		lsm4	dcaf12	mrto4	anxa7	adar		laptm4a		mkrn1
																																				mul1		diablo		nosip	nup85	slc35b2	tmed4	taf6		fgf8		hsph1
																																				ggt1		ctu1		cct7	agk	nop14	rbm16	fam58a		rab18		ctnna1
																																				traf6		cse1l		zfand5	xpr1	uchl5	ccdc124	ttc4		ncoa5		zbtb44
																																				retsat		rbm42		ghitm	rbm9	polr2i	gng5	cdca8		arcn1		rangrf
																																				stk25		hey1		ube2b	sirt4	srp19	eif2b3	crkl		cct2		extl3
																																				cndp2		cyp4v2		itgb1bp3	ube2f	arih1	mkl1	ddb1		pgam1		c1orf128
																																				ccni		rnf139		pmpca	cyp4v2	trappc4	psme4	ndc80		nfkbia		pofut1
																																				c11orf2		dctn4		arf5	nufip1	exosc8	gpr177	st3gal6		bin1		cmbl
																																				klhl21		med7		ddx17	tspan13	setd6	aldh2	rnf126		ubxn1		fubp3
																																				alpl		c19orf6		pa2g4	sptlc2	crk	atp5d	dcaf10		g3bp1		snrpb2
																																				strn3		auh		paip2b	stk3	ephb4	sec62	ing2		sox2		usp44
																																				ptgr1		triobp		psma5	pcbd1	nsun2	brd9	slc2a2		ctdsp2		dhrs3
																																				me2		arhgap1		myef2	cd2ap	smc4	gpx3	plk1		ipo5		qrich1
																																				ppp1r15b		gpx1		tuba4a	stard3	nle1	gnai1	mcm2		eif4a3		hmgxb4
																																				clk1		mfge8		ranbp1	brms1l	tmem167b	znf346	dbt		c17orf85		gtf2e2
																																				sfrp1		thtpa		tbc1d10a	znf259	coq7	maea	snrnp48		slc16a3		yeats4
																																				mrpl24		gtpbp10		rnpep	bre	atg16l1	ext1	rpa3		prps1l1		prpf3
																																				ptcd3		gnb4		rab18	c22orf13	rag1ap1	cdk2ap1	rnf168		got1		eef1e1
																																				scpep1		c5orf24		sumo3	slc25a10	ythdf3	irf2bp2	crcp		ube2b		sumo1
																																				rptor		ppp2r4		nek9	blmh	ext1	tmem33	phax		ndufv1		srp19
																																				rasgef1a		ncald		cope	rnf139	rangrf	bcas2	golga2		ddost		mxi1
																																				hunk		sap30l		eif4a2	dctn4	hipk2	akr1b1	ccdc49		sdf4		ssr1
																																				palm		lmf2		slc25a20.2	rap2a	hsbp1	prkcsh	mon2		rpl22		arhgap21
																																				pygm		sytl2		rab1a	mri1	c7orf41	ppp2r1b	qtrtd1		ctsc		lsm14a
																																				pigs		otud3		psmc5	fam136a	plxna1	psmd4	sacm1l		ahcy		mad1l1
																																				mef2d		mrps34		rad23b	dbnl	dazap1	rpap3	emp2		cct4		ppp2r5e
																																				tars		c22orf28		cd2bp2	c6orf136	nhp2l1	cpsf4	nmd3		map2k1		psmg1
																																				alg2		frmd8		arcn1	appl1	ppp2r5e	mapk1	glipr2		cope		prpf6
																																				hsp90aa1.1		ndufa8		c19orf47	gfpt1	qki	abi1	wrb		kiaa0020		camk2g
																																				cnrip1		ndufs3		lypla2	dapk3	kti12	sfrs13a	chst2		aldh9a1		pip5k1a
																																				cpe		txndc9		mgrn1	stk39	thoc7	tmem128	pwp1		capzb		c4orf43
																																				lpin2		bloc1s2		ube2a	tfcp2	rnaseh2b	kcmf1	scmh1		c16orf72		znf622
																																				fam102a		tbca		psmc2	vbp1	smpd4	atp6v0b	tcp1		dcaf11		map2k5
																																				itgb1bp2		selenbp1		dlst	socs6	cfp	sf3a1	ccnk		aldoa		qki
																																				zeb1		kctd12		rnf10	gnai2	rbm7	zfand6	sip1		pa2g4		ube2e3
																																				arl4c		bckdk		g3bp1	gdap2	ythdf2	pdcd10	col18a1		sdcbp		arih1
																																				grb2		atp1a2		nnt	rela	pip5k1a	eif3j	ufd1l		c11orf59		ctr9
																																				upb1		col1a2		rbm22	fam18b	pecr	klhdc4	c7orf41		btf3l4		hdac1
																																				foxd3		cdk5rap3		srp72	psmb3	sec62	ppp1r11	c12orf41		serinc3		ccdc25
																																				ddi1		coq9		eif3m	atf1	cdc34	pias3	tomm70a		psmc5		pbx1
																																				senp6		rela		actl6a	tmem50a	mettl9	sqstm1	cfp		gps1		rnmt
																																				itpkc		idi2		psmd8	atp6v0d1	qrich1	map1lc3a	akr1b1		spcs3		top2a
																																				akap2		ipo9		lpar4	fnta	mad1l1	exoc7	klhdc4		cdknx		rrm1
																																				psph		rcn2		sav1	ccnl1	pla2g12a	siah1	psen1		idh3g		nutf2
																																				sh3yl1		hsd17b12		trip12	erf	banp	zranb2	copg		myef2		adam10
																																				slc1a4		errfi1		vps29	gpn3	wdr3	ogdh	timp3		ctsa		mdk
																																				aadacl4		oaz2		c9orf78	hebp1	kdm3a	lmnb1	fbln1		clta		acsbg2
																																				pelp1		casp3		ywhab	ppm1b	gtf2f1	cdo1	slc35b2		rac1		ppp6c
																																				osbpl11		zfp36		creb1	ube2h	nob1	syap1	coq7		hadhb		sppl3
																																				icmt		tsg101		sgta	rbm23	ptbp1	psen1	c3		ptges3		smarcb1
																																				boc		ppap2b		api5	cisd1	rprd1a	bat3	spcs2		arpc5		mfap1
																																				flrt3		gdap2		tmem147	lrig3	idh3a	cd82	kiaa1310		ctsb		eif3j
																																				mboat1		app		gosr1	rnf126	papd4	hmgcr	sephs1		azin1		bub3
																																				nbr1		osbpl2		ube2l3	dcaf10	rab11a	tmem39b	plk2		smarce1		nudc
																																				fgfrl1		lsp1		thrap3	ing2	copb2	nup54	creb3		rpl28		c9orf78
																																				slit2		slc43a2		edc4	ccdc28b	nfkbia	nek2	cep97		cox4i1		pum1
																																				mrpl11		nr1h2		dgcr8	rnmt	c3	h1fx	rs1		ppp4c		mpp1
																																				fen1		vamp2		fbxo11	znf622	uqcrfs1	srp54	efnb2		uqcrfs1		add3
																																				bmi1		rab30		aldob	lap3	dcaf7	ptp4a2	fzd3		eif5		chmp6
																																				sh3rf1		tmlhe		akirin2	lmbrd1	cdv3	clk2	ddx55		mapre1		rap2b
																																				taf4		lect1		pafah1b1	ocln	npm1	mdh2	pcnp		tpm4		zfand3
																																				dtx2		fam18b		aplp2	slc35a3	mmgt1	ppp4r1	hat1		actr2		cwc15
																																				capn2.2		c18orf19		slc16a1	tacc3	eif6	sf3b2	hdac6		ddx39		jagn1
																																				agpat4		snta1		snrpb	top2a	gpnmb	sesn1	rfx5		rpn2		chmp4b
																																				arhgdia		mapkapk2		ctnnb1	akirin1	csnk1e	rgs2	pwp2		ndufs1		dazap1
																																				commd5		ap1ar		azin1	rae1	psen1	hsbp1	stx6		psmd2		znf207
																																				bcl2l2		ube2e2		ctsa	rer1	copg	ptp4a1	pax6		coro1c		bap1
																																				hint1		cyp20a1		ccdc25	gtf2e2	spcs2	psmc4	c19orf52		rpl18		kdelr1
																																				cask		ttk		pbx1	polr2g	kiaa1310	rab2b	exosc2		tktl2		sf3a1
																																				galk1		slc37a3		mdk	copg2	sephs1	atic	efna3		serbp1		sec62
																																				zbtb5		ankrd13a		mpp1	ppat	cpsf7	pfkm	tbx1		pno1		gnai1
																																				brcc3		cry1		zfand3	usp22	gmeb1	snai2	prdm1		kars		uba2
																																				dcaf13		prkag1		uba2	zic2	lrrc58	amfr	ccnb3		vim		cbx3
																																				alg1		lmbrd1		rmnd5a	hsph1	rqcd1	eef1d	bmp7.1		u2af2		nosip
																																				ripk1		sppl2b		smarcd1	eef1e1	siah1	arpc4	epb41l3		cct3		kpna2
																																				kpna6		ocln		papola	cldnd1	cd82	ndufb10	insm1		arglu1		rmnd5a
																																				eprs		syvn1		marcksl1	bub1b	ctsd	actr10	h1f0		hnrnph2		cdc42
																																				gnas		nup54		gspt1	ankrd10	bap1	c7orf20	prkd1		ipo7		smarcd1
																																				ndst1		c18orf25		apex1	acbd6	kdelr1	csnk2a2	zdhhc3		sumo3		sf1
																																				mtus1		slc35a3		calu	gtf2a1	anxa11	fip1l1	wbp4		gpnmb		papola
																																				edem1		tacc3		pak1ip1	c9orf82	mxi1	grhl1	jund		sparc		txnl1
																																				git2		mlst8		c7orf28b	epha4	arfgap1	myl6	pnpo		rps16		marcksl1
																																				ubap1		fgf8		cstf3	brix1	nfya	gars	dbnl		acsl1		cd82
																																				rbm19		cask		alkbh5	tbpl1	hes1	abcf3	pycr1		rab2a		cdc34
																																				fam129b		lztfl1		cpt2	tmem48	plk2	lsm4	mapk11		rad23b		ube2l3
																																				nubp1		trmt2a		ap3m2	cidea	stx16	ywhah	rab27b		psma7		thoc1
																																				map3k7ip1		ppm1l		snrpc	polr2b	mms19	thbs1	msn		uqcrc1		tbc1d10a
																																				asrgl1		kpnb1		tmem30a	tpd52	c1orf128	tram1	slc7a3		suclg1		ube2i
																																				c1orf21		rnf25		tktl2	snx2	aph1a	ube2l3	psma6		lypla2		gspt1
																																				lztfl1		tmcc1		bmp4	ncln	creb3	ube2i	cgnl1		mgrn1		ythdc1
																																				trmt2a		mtmr9		gorasp2	stx10	hmgcr	xrn2	adipor1		mcl1		etf1
																																				camlg		c3orf26		rab6a	rabggtb	ube2e3	pdia6	kcmf1		sfrs7		med25
																																				ppp2r3b		rwdd4a		cltc	emp2	nutf2	nosip	atp6v0b		ube2a		eif6
																																				polr3e		adk		bat3	slc39a9	slc9a3r1	atg3	gars		psmd13		copb2
																																				ppm1l		xpr1		ncor1	hbxip	mrpl3	kpna2	cops6		dvl3		psmc4
																																				ccdc109b		rbm9		ptk2	dld	arpp19	syncrip	elovl1		eif3l		anxa11
																																				atp13a1		erlec1		prpf18	myl1	tmem101	gyg1	adsl		ppp2r2a		smpd4
																																				pik3ip1		ndufb3		junb	cyb5a	rxrb	gabarapl2	pgam1		eif4a2		ranbp1
																																				slc7a7		cyth1		pmp22	rnf25	cnih4	sirt5	bin1		eif1b		snrpb
																																				impad1		ppp1r13b		hibadh	timm44	trmt6	lass3	fbxo9		etfb		thrap3
																																				slc41a2		phldb1		rplp2	kpnb1	map2k5	dazap1	bcap31		cldn4		arf5
																																				eps8		psenen		uba52	yipf2	scmh1	copg	cox4i1		npm1		ddx17
																																				tmem185a		tmem93		rpl34	kiaa0317	gltpd1	rplp2	bnip3		fxr1		rbm8a
																																				kpnb1		stx5		rpl35	asmtl	rg9mtd2	slc39a7	uqcrc1		hmgb2		paip2b
																																				memo1		dhcr24		cops5	ssr3	sssca1	thoc4	ctsc		glud1		ppp2ca
																																				psmd14		gnao1		rpl37	wbscr16	actr6	cdc37	aldh9a1		kpna4		nhp2l1
																																				pcyt2		atg4b		cd81	tle4	chst2	ppap2b	tkt		mst4		g3bp1
																																				gcat		rab3a		fam48a	stk24	mlf2	mboat7	ndufs2		psmc3		rad23b
																																				ppp1r13l		ahcyl2		dars	thul16	hcfc1	lsm2	iscu		chchd2		tubb
																																				copb1		unc119b		anxa2	nf2	arrdc1	ctsd	ndrg2		ccng1		pa2g4
																																				slc25a39		tmem111.2		etfb	ndst1	mkrn1	tpm1	atp5c1		krt19		myef2
																																				kank1.2		lrp2bp		rpl21	stk11	vav2	scyl1	atp1b1		dusp1		lypla2
																																				drg1		mtap		fau	phf13	senp3	ucp2	got2		tagln2		npm1
																																				c7orf42		mtx2		rps9	mcts1	cep97	ltv1	pgm1		st13		fgfr4
																																				ubl7		mib1		ndufs1	supt16h	gps2	arl1	hebp2		grn		dlst
																																				rasl11b		myf5		rpl14	nudc	myl9	yipf5	far1		impdh1		actl6a
																																				tprg1l		aco1		kars	cul4b	herpud1	gpi	ergic2		ube2g2		cd2bp2
																																				yif1b		yipf2		arglu1	col18a1	pdlim1	jup	vim		rpl21		psmc2
																																				ppfibp2		eaf2		impdh2	glod4	mospd3	bap1	mknk2		rps9		rbm22
																																				pdcd4		dnmt1		rpl10a	tmem85	tyk2	kdelr1	snx17		ndrg2		srp72
																																				ppap2a		sh3bp4		eef1b2	thap1	parn	cops6	riok3		itgb1		stmn1
																																				rnf25		prdx4		rps15	asw	taf6l	thrap3	plaa		fus		rae1
																																				shmt2		gphn		rpl32	qtrt1	prdx5	ddx47	aldh6a1		txnrd3		gtf2e1
																																				tmem128		pan2		rpl9	c8orf42	bmp7.1	mta2	mrps17		twsg1		tmed5
																																				exoc7		bet1		rps11	suds3	mfsd5	edc4	pi4kb		bsg		slc2a1
																																				sirt5		ilkap		rps26	rps17	pds5a	denr	ube2n		tkt		chmp2b
																																				mboat7		mrpl45		rpl17	rrp7a	u2af1	ip6k2	aagab		ard1a		dnajc17
																																				actr1a		phf10		rps10	pik3ip1	rarg	pdk4	cotl1		eno1		strbp
																																				tmem59		sgpl1		rps12	kiaa1267	rcc2	hpgds	dnajb14		cs		c4orf41
																																				acly		capns1		rpl13	capns1	slc25a24	actr1a	c5orf32		eif2s1		csrp2
																																				ivns1abp		gpn2		rps7	vps28	h1f0	tmem59	snapc1		iscu		polr2g
																																				otub1		fxc1		bcas2	rsrc1	ass1	txnl1	dph5		dlst		psmb7
																																				ryk		nampt		hnrnpa3	ruvbl2	mapk11	hnrnpa3	nxn		nnt		cept1
																																				dzip1		rraga		zmiz2	atg4c	pgm1	rbm17	rassf2		tra2a		arrdc3
																																				mrpl1		smyd5		actr2	cltb	hebp2	brd7	anxa4		ppib		ubl5
																																				smad6		luc7l		ppib	cebpg	far1	elovl1	mmp14		prdx6		ikbkb
																																				bnip3l		llgl2		ube2d1	phf10	cgnl1	fos	zdhhc6		slc5a8		wdr74
																																				taf9		vbp1		suz12	llgl2	cops6	bat1	zmpste24		odc1		lpar4
																																				tmcc1		soat1		ubtf	soat1	kcmf1	nucb1	chchd4		cox7a2l		copg2
																																				sestd1		tmem120b		ppp2r2d	c16orf13	bin1	pcmt1	eif2b4		sar1a		c20orf30
																																				paf1		ruvbl2		pck2	elf1	fbxo9	adsl	h2afy2		ccnl2		nrarp
																																				mtmr9		ip6k2		ogdh	hdac2	adsl	dgcr8	ptpra		pdha1		ostf1
																																				shpk		cpne1		bysl	gpd1l	aldh9a1	morf4l1	tpd52		cebpd		nop16
																																				med4		upf1		matr3	upk1a	ergic2	syf2	stoml2		cd2bp2		dpm1
																																				pkmyt1		rpa2		rbbp5	ncbp1	bnip3	cebpg	fgfr2		nckap1		ugdh
																																				gmfb		hsdl2		elof1	men1	uqcrc1	golga7	ppp2r1a		rpl14		rpn1
																																				c3orf26		sh3glb2		wdr18	htra1	tkt	dync1li1	prdx3		t		c10orf58
																																				asna1		nova1		ppp2r1b	snx12	ndufs2	fbxo11	aldoc		fn1		zc3h10
																																				sp2		socs6		kiaa0020	coq10a	vim	ensa	cap1		tuba4b		pygl
																																				agps		atp6v1b2		hnrnpc	qars	iscu	adh5p4	atic		impdh2		utp15
																																				fam20b		phf1		ppil2	pygm	ndrg2	cabc1	actr10		skp1		ppat
																																				rnf185		dera		krr1	ppfibp2	atp5c1	slc44a2	tpm1		psmc2		sav1
																																				ube2k		spred1		ssbp3	fam100b	atp1b1	sdhb	birc2		rbm22		eif2b2
																																				ahcy		tfcp2		rpf2	pld3	gars	wtap	acadl		ndfip1		sfrs13b
																																				klhl18		gnai2		lamp2	tbx1	bcap31	rab11a	rab7a		lsm12		rbm4b
																																				dld		atg4c		rps13	cebpz	mknk2	birc2	chchd3		ptma		wdr77
																																				atp6v1h		cltb		cbfa2t2	zdhhc8	elovl1	acadl	pls3		reep5		tomm40
																																				med27		c16orf13		atp5j2	ngdn	snx17	uba52	arl6ip1		cct5		pcm1
																																				smox		elf1		tceb1	prkag2	prkd1	rpl34	hadha		tuba1c		kdm2b
																																				anapc4		hdac2		atg3	rbmx	psma6	zc3h11a	aldoa		xbp1		eftud2
																																				g3bp2		rnf13		nup50	imp4	riok3	rab7a	ppa2		rps26		derl1
																																				nol6		itpk1		htatsf1	spry2	ctsc	atp5g1	pnrc2		tuba1b		cxadr
																																				ercc5		msl3		frg1	surf6	got2	gsto1	rac1		itm2b		acvr1
																																				ppfia1		fam108a2		taf15	ap1b1	zdhhc3	rab14	stip1		vcp		slc35b1
																																				ldb1		akt1s1		ncapg	ap1g1	pnpo	chchd3	rab2a		arpc2		sema6d
																																				vti1a		rragc		c7orf23	uchl3	msn	aldob	cct4		ywhaz		gtf2f2.2
																																				gxylt1		cdca4		sall2	actc1	atp6v0b	rbm8a	rtn3		hnrnpu		trip12
																																				dctn5		sdf2l1		sox7	fa2h	plaa	ppp2r5c	ccng1		actr3		vps29
																																				asb13		dusp12		tll1	saps3	txnip	psma1	cyr61		calr		farsa
																																				pafah1b3		cuta		ap3s1	acadm	nxn	cpne1	slc5a8		hmgn1		c20orf43
																																				suclg2		pcolce2		phb	ano5	rassf2	gsn	cox7a2l		atp5c1		ywhab
																																				comt		fstl1		timm17a	nmd3	anxa4	smpd4	snx2		actl6a		creb1
																																				wdr70		fnbp1l		npepl1	zhx3	mmp14	pls3	polb		hadh		psmb2
																																				esd		cox17		cnbp	cpsf4	tpd52	rpl35	enpp2		stmn1		psmd6
																																				naaa		vps28		nfyc	slc2a2	snx2	dync1i2	arrb2		atp1b1		sgta
																																				ttyh2		rsrc1		rbm45	fzr1	polb	ppp2ca	ndufa9		csde1		api5
																																				st3gal3		cdo1		sdha	clcn5	stoml2	loc646644	got1		mat2a		rps6kb1
																																				c14orf21		alas1		ndufv1	plk1	prdx3	qars	flot1		cct8		cpsf6
																																				taok2		rab8b		sdf4	mcm2	stip1	arhgdig	spns1		eif3m		cops8.2
																																				leng8		gpd1l		ssb	psmb7	rab2a	cnbp	sulf2		hsp90ab1		ddx19b
																																				rwdd4a		trim33		tpm4	rfc4	cct4	scamp2	map2k7		ldhb		elf2
																																				adk		c11orf46		laptm4a	cherp	cox7a2l	stk38l	cul3		eif3i		tmem147
																																				dis3l		cebpg		mcl1	mrpl12	pls3	acly	c10orf104		prdx1		dnajb12
																																				xpr1		ednra		psmd13	dvl3	enpp2	actn1	thul16		metap2		usp25
																																				rbm9		aqp3		kiaa0494	ccne1	birc2	akirin2	nf2		hmgb1		gosr1
																																				stk11		pdk4		eif1b	gnpnat1	arrb2	net1	kdsr		phb		copa
																																				erlec1		c2orf76		tmem222	ube2v2	acadl	ncor1	commd8		elovl7		wdr61
																																				uchl1		nr4a1		gps1	mrto4	aldoa	nhp2l1	rapgef1		dazap2		rbm16
																																				ndufb3		c9		kpna4	nudcd1	rtn3	copb2	dlat		rnf10		cdk2ap1
																																				cyth1		rbmx2		c11orf59	slc35b2	slc5a8	arl6ip1	stau2		pkm2		irf2bp2
																																				ppp1r13b		slc2a2		psmc3	nop14	ndufa9	cct7	gpm6b		timm23		tmem33
																																				phldb1		fzr1		sdcbp	uchl5	got1	zfand5	rab4b		idh2		prkcsh
																																				psenen		pura		amd1	polr2i	pnrc2	nfyc	nrip1		rpl10a		mapk1
																																				tmem93		klf2		ppp1cb	srp19	flot1	rbm45	wasf1		eef1b2		abi1
																																				hsf2		uba3		yy1	arih1	tpm1	anp32a	klf11		rps15		zranb2
																																				stx5		supt3h		psma7	trappc4	chchd3	cenpa	dctn1		cdk4		nek2
																																				dhcr24		clcn5		eif3h	exosc8	arl6ip1	prkag2	ppp3cb		rpl9		ptp4a2
																																				gnao1		ube3c		lsm12	setd6	hadha	cnn1	fam136a		psap		ptp4a1
																																				atg4b		exosc7		rbm39	crk	rac1	pafah1b1	tbrg1		tp53		rab2b
																																				rab3a		syngr2		ptma	ephb4	ccng1	cops5	cdk9		rps11		c7orf20
																																				ahcyl2		mcm4		reep5	nsun2	cyr61	pfn1	oxr1		rps13		fip1l1
																																				unc119b		zhx3		dcaf11	smc4	ppp2r1a	aldh3a2	gpr177		tcf7l1		abcf3
																																				tmem111.2		cdca8		eif5	nle1	cap1	rrbp1	dazap2		hnrnpd		lsm4
																																				lrp2bp		rnf168		psmc1	tmem167b	spns1	aplp2	ncbp1		eif2s3		xrn2
																																				mtap		dcaf10		eif3i	sox11	actr10	ghitm	glrx3		vdac1		pdia6
																																				mtx2		plk1		prdx1	ikbkb	ptpra	zmiz2	kiaa0892		eif3c		cdc37
																																				fgfr3		crkl		metap2	dhrs3	sulf2	vps4b	gipc1		rps3		scyl1
																																				stambpl1		ddb1		hmgb1	sec63	foxf1	caprin1	nvl		gltscr2		edc4
																																				agpat3		ndc80		pno1	asna1	eif2b4	psmd1	aimp1		gadd45g		bat1
																																				mospd2		rnf126		psmd2	atp6v1h	mapk8	pgam1	mrps7		rpl15		dgcr8
																																				prmt7		ing2		cs	ece1	ncbp1	ubxn1	tram1		dhx32		dync1li1
																																				tbp		mcm2		fn1	dgcr14	gpr177	cdc34	shmt1		ftmt		fbxo11
																																				cnot10		dbt		serbp1	prpf8	glrx3	nfkbia	farsb		btg1		adh5p4
																																				tmx3		snrnp48		pdha1	mst1	dazap2	bin1	parvb		tomm20		aldob
																																				sec24d		rpa3		eif2s3	map1lc3b	uchl3	hadha	kdelr2		capza2		loc646644
																																				mcrs1		crcp		vdac1	syap1	farsb	slc16a1	ube2m		atp6v0c		arhgdig
																																				med8		gpx7		eif3c	pola2	parvb	atp6v1c1	hscb		cct6a		akirin2
																																				pppde1		rnd3		tuba1c	nid1	slc44a2	fbxo9	cpvl		eif5a		cct7
																																				ints12		kdelr3		rps3	coq7	tram1	nxn	lrig3		cfl1		zfand5
																																				pigq		sgsm3		ftmt	sri	kdelr2	htatsf1	ppm1g		hspa9		cnn1
																																				wdr67		zcchc8		hsp90ab1	rrp1b	cebpa	tceb2	rae1		scp2		pafah1b1
																																				kiaa1524		emp2		btg1	poldip3	ube2m	snrpb	gtf2e1		ddx3x		aplp2
																																				slc35a1		slc39a9		tomm20	pomp	hscb	ctdsp2	rer1		wsb1		ghitm
																																				chst7		ube2c		capza2	yif1b	cpvl	usp10	tmed5		uqcrc2		slc16a1
																																				pcgf2		lrwd1		atp6v0c	mrpl24	psmb7	ipo5	mmadhc		atp5f1		ube2b
																																				kiaa1600		nudcd1		cct6a	vezf1	rfc4	upf1	slc2a1		nme2		btg2
																																				ttyh3		lta4h		eif5a	c12orf41	utp15	ube2b	chmp2b		atf4		itgb1bp3
																																				c1orf43		efnb2		cfl1	pwp2	tspan31	ddost	dnajc17		txndc5		mobkl3
																																				fam82a2		wrb		hspa9	stx6	cdk2ap1	sub1	strbp		eif3k		pmpca
																																				rhobtb1		pwp1		scp2	c15orf63	ptp4a1	sdha	c4orf41		hdlbp		ppm1a
																																				bcar3		col18a1		ddx3x	gpr107	txnl1	ndufv1	csrp2		rpl27		pgrmc2
																																				c17orf49		ufd1l		wsb1	sec23ip	ranbp9	sdf4	gtf2e2		tmed2		psma5
																																				sirt7		c12orf41		uqcrc2	spats2	cept1	tbx2	polr2g		pdcd6ip		tuba4a
																																				sec11a		tomm70a		timm23	yeats4	psmg1	btg2	psmb7		id3		rnpep
																																				prmt10		fzd3		idh2	ssr1	sema6d	itgb1bp3	cept1		rpl17		rab18
																																				etv1		pwp2		rheb	rrm1	arhgdig	psmb1	arrdc3		rps10		sumo3
																																				edem3		ddx55		nme2	fam53a	sumo1	clock	ubl5		rps12		nek9
																																				smcr7		stx6		atf4	grpel1	cdc42	mobkl3	ikbkb		rpl13		cope
																																				nrbp1		exosc2		txndc5	smarcd2	abi2	psma3	wdr74		rps7		ppp2r2a
																																				tyw1		ppp6c		rps19	papss1	snap29	kiaa0020	lpar4		pdia3		eif4a2
																																				higd2a		mrpl21		eif3k	usp7	pbx2	sgk1	copg2		rpl27a		ctnnb1
																																				tyw3		c3orf19		pkm2	ttc30	tmed7	pmpca	c20orf30		arf4		azin1
																																				prrc1		clasp1		rpl27	lypla1	ric8a	cd81	nrarp		csnk1a1		ctsa
																																				lars		fundc1		arf4	cgn	bat1	psmd7	ostf1		calm2		arcn1
																																				slc25a1		ctnnal1		mdh1	slc30a6	wdr74	hmgn2	nop16		rcl1		mgrn1
																																				donson		c9orf80		rpl15	tprg1l	zc3h10	alas1	psmg1		rplp1		ube2a
																																				alg8		c15orf63		sfrs18	cidec	rap2b	med25	dpm1		rap1b		ndfip1
																																				gatad2a		elavl1		ppp2cb	snx3	kctd10	arf5	ugdh		id4		rnf10
																																				coq10a		lsm7		actg1	brd4	m6pr	bcap31	rpn1		psmd8		eif3m
																																				fam100b		c4orf43		cd63	cndp2	ube2b	aldoa	c10orf58		dag1		rfc4
																																				tax1bp1		glod4		tubb2c	eps8	paip2b	ddx17	zc3h10		rpl7a		tspan31
																																				eps15l1		kpna3		eif4a1	ddx54	tuba4a	sf3a3	pygl		ywhae		ranbp9
																																				ctps2		hiat1		pabpc1	dusp6	sumo3	pa2g4	utp15		ilf2		abi2
																																				ttc15		dhx15		dnaja2	cyyr1	actl6a	sfrs9	ppat		spint2		snap29
																																				usf2		tmem85		rpl24	nfyb	trip12	cdh1	sav1		slc7a8		pbx2
																																				nkrf		gpr107		itm2a	xpo1	vps29	serinc3	eif2b2		got2		tmed7
																																				anapc10		cpsf3		eif3d	lsg1	tmem147	ctnnd1	arhgap21		mdh1		ric8a
																																				ppt2		cdc40		ddx21	irg1	ube2l3	btf3l4	sfrs13b		cops2		kctd10
																																				syngr1		ero1lb		rpl19	sf3b1	snrpb	ap1m1	rbm4b		ilf3		m6pr
																																				rint1		sppl3		rpl18a	smc3	mdk	ppm1a	wdr77		rpl10		apex1
																																				tspyl2		cwc15		pcbp3	lsm6	uba2	pgrmc2	rnmt		ppp2cb		calu
																																				etv3		zcchc10		slc25a3	lsm3	apex1	ppa2	jagn1		actg1		pak1ip1
																																				ppp1r3b		poldip3		rplp0	akt2	calu	cdknx	tomm40		cd63		c7orf28b
																																				ndufa6		pomp		rpl6	slc30a2	pak1ip1	psma5	pcm1		tubb2c		c19orf56
																																				rala		apool		rpl8	phactr4	c7orf28b	spcs3	kdm2b		eif4a1		fam96b
																																				wdr5		ica1		rps6	pfdn5	c19orf56	usp14	eftud2		pabpc1		cstf2
																																				lpar1		e4f1		atp5a1	taf6l	fam96b	gtpbp4	derl1		dnaja2		glud1
																																				ppp1r8		ccar1		rpl7	sf3a3	cstf2	idh3g	cxadr		rpl24		vps45
																																				pgs1		hsd17b10		rpsa	krt12	c7orf20	pnrc2	acvr1		itm2a		midn
																																				nr2f6		ddx52		rsl24d1	pgam5	ube2i	rac1	slc35b1		eif3d		casc3
																																				hprt1		brd3		rps27a	fkbp4	xrn2	tuba4a	sema6d		ddx21		tcea1
																																				ankrd12		rrs1		vgll4	strap	chmp6	myef2	gtf2f2.2		rpl19		tmbim6
																																				cenpm		thap1		arpc3	gatm	dync1li1	psmd12	adam10		rpl18a		fam108c1
																																				mnat1		sin3b		trappc3	supt7l	ppp2r2a	phb2	trip12		pcbp3		yars
																																				c1orf89		sox13		ppp1r14b	acp5	tubb	luc7l2	vps29		slc25a3		rgma
																																				limch1		sec23ip		psmd4	slc37a2	glud1	ptges3	prpf6		rplp0		polr1c
																																				dstyk		phf5a		h1fx	cant1	ndfip1	ssb	hdac1		rpl6		rab1a
																																				ext2		phf13		arpc4	e2f4	dpm1	sfrs6	acsbg2		rpl8		c19orf47
																																				c19orf40		spats2		jup	aldh1a2	wdr77	mgmt	farsa		rps6		cstf3
																																				aldh4a1		zbtb44		nucb1	anxa3	c20orf43	krt5.7	c20orf43		atp5a1		alkbh5
																																				fam69a		fubp3		dync1i2	mrps17	copa	sat1	c9orf78		rpl7		cpt2
																																				map1lc3b		hmgxb4		anp32a	sdhb	rbm16	shmt1	ywhab		rpsa		ap3m2
																																				gjb6		yeats4		psmd1	atg16l1	gnai1	rsrc2	creb1		rsl24d1		snrpc
																																				prelid1		ssr1		usp10	rarg	irf2bp2	cox4i1	psmb2		nptn		tmem30a
																																				bmp7.1		rrm1		ddost	rcc2	tmem33	rpl28	psmd6		ctsl2		tktl2
																																				tbrg1		mfap1		sub1	rag1ap1	mapk1	metrnl	sgta		ran		bmp4
																																				smad1		nudc		phb2	ythdf3	abi1	pgk1	api5		rhoa		gorasp2
																																				cdk9		fzd7		tef	ext1	sf3a1	ak2	rps6kb1		oaz1		rab6a
																																				dazap2		sirt6		ddx42	slc30a5	abcf3	vps26a	cpsf6		ogt		cltc
																																				ncbp1		nat11		u2af2	actn4	pdia6	uqcrfs1	cops8.2		hmgb3		clns1a
																																				kiaa0892		cobra1		capzb	sqrdl	scyl1	dcaf7	ddx19b		ddx5		mtpn
																																				ggcx		eif2c2		clta	chp	cnn1	anxa4	elf2		csnk2b		rnf121
																																				mthfr		polr1e		dusp1	msh6	acbd3	sccpdh.2	tmem147		eif3a		gpkow
																																				sall3		sap18		tagln2	hells	pofut1	mapre1	chmp4b		ckap4		taf5
																																				krt19		dnal4		aes	ube2j2	add3	tef	dnajb12		gnb2l1		clk3
																																				gpx3		nup43		abce1	raf1	znf207	tpm4	usp25		rps2		nipsnap1
																																				mef2a		snrnp40		hif1a	pgm1	cbx3	rnpep	gosr1		tcf3		ddah2
																																				c12orf4		rbm26		itm2b	hebp2	sf1	ddx42	copa		hsp90b1		med15
																																				taok3		slc35e1		vcp	c12orf10	ythdc1	hk1	wdr61		rcc1		klf8
																																				fgf13		hs2st1		arpc2	aldh3a2	vps45	rpl18	rbm16		bambi		pds5b
																																				gns		snrpf		ywhaz	ak2	midn	rpn2	gnai1		dhx9		ccdc28b
																																				tp53i3		sap30bp		calr	vps26a	casc3	gnl2	cdk2ap1		pfn2		akirin1
																																				khnyn		c1orf156		selt	kdsr	tcea1	dars	irf2bp2		gdi1		cldnd1
																																				alg10b		blzf1		flot2	commd8	tmbim6	anxa2	tmem33		krt8		bub1b
																																				zfpl1		cdc25c		cnot3	slc7a3	fam108c1	anp32e	prkcsh		rps14		ankrd10
																																				mal		polr2h		atp1b3	psme4	yars	hnrnph3	mapk1		rps18		acbd6
																																				tollip		rbm12		smarce1	pycr1	rgma	hspa8	abi1		rpl3		gtf2a1
																																				atp1b2		cetn3		tsn	rab27b	polr1c	anxa11	sf3a1		btf3		c9orf82
																																				slc1a3		znf740		sec13	pias3	zranb2	bnip3	eif3j		rpl5		epha4
																																				limk2		mcts1		cox5a	cyb5r3	chmp4b	rab18	zranb2		eef1g		brix1
																																				ehd4		supt16h		slc16a3	ethe1	usp25	cct2	nek2		rps5		tbpl1
																																				c14orf166		cul4b		chd4	pgam1	psmc4	cdv3	ptp4a2		atp5b		tmem48
																																				stat1		asw		serpine2	prmt3	lsm4	wdr1	ptp4a1		naca.2		cidea
																																				phlda1		qtrt1		zc3h15	igbp1	nosip	lbh	psmc4		rpl13a		hbxip
																																				bat5		c8orf42		cul1	pigt	cct7	stip1	rab2b		rps23		sec63
																																				zmat3		suds3		tmed2	wasl	itgb1bp3	frg1	c7orf20		rpl11		tpp2
																																				elovl2		rps17		stom	aftph	pmpca	u2af2	fip1l1		ctnnbl1		sap130
																																				atp2c2		rrp7a		ap2a2	pccb	arf5	laptm4a	abcf3		anxa5		srfbp1
																																				taok1		sri		tcf7l1	agfg1	ddx17	ppap2c	lsm4		tbrg4		rpf1
																																				hspc159		rrp1b		actr3	ppp1r11	pa2g4	rab2a	ube2l3		rps25		tp53bp2
																																				parg		vezf1		rplp1	med7	psma5	sumo3	ube2i		marcks		nup205
																																				atg5		fam53a		ctnnd1	c19orf6	myef2	eif4a3	xrn2		rpa1		setd8
																																				ctps		grpel1		usp14	fmr1	ranbp1	rps16	pdia6		sumo2		cxorf56
																																				hexdc		smarcd2		prmt1	zfp36l2	nek9	suclg1	nosip		rpl12		arl5a
																																				mff		papss1		sparc	ndufa8	cope	uqcrc1	kpna2		ywhaq		tia1
																																				fibp		usp7		acsl1	ppap2b	eif4a2	cct4	cdc37		plin2		nup93
																																				snapin		ttc30		coro1c	tsg101	rab1a	rtn3	scyl1		ss18		rpp30
																																				c3orf58		lypla1		itgb1	app	rad23b	nek9	thrap3		magoh		ehd1
																																				fam53c		cgn		sae1	osbpl2	cd2bp2	sec23b	edc4		tmem126a		slc25a13
																																				slc25a32		slc30a6		hdgf	brp44	arcn1	ivns1abp	txnl1		atp1a1		hspa4
																																				tom1		ndufb2		csnk1a1	ppm1g	c19orf47	map2k1	bat1		h2afz		c1orf55
																																				rnf14		vangl2		srp54	polb	lypla2	mcl1	dgcr8		cox5a		frs2
																																				pip5k1b		znf639		eif4a3	arl1	mgrn1	sfrs7	dync1li1		lamp1		drap1
																																				apcdd1		dad1		hnrnph2	ipo5	ube2a	ube2g1	fbxo11		hmgn3		kiaa1826
																																				ydjc		cstf1		odc1	dnajc8	psmc2	gpt2	adh5p4		cd9		stard7
																																				ublcp1		cirh1a		c1orf77	snrnp70	dlst	cope	aldob		ociad2		cox4nb
																																				rchy1		eif1ad		ipo7	slc29a2	rnf10	psmd13	rbm8a		dact1		cdkal1
																																				elovl5		slc25a44		ctdspl2	riok2	g3bp1	kiaa0494	ppp2ca		id2		arvcf
																																				fam43a		grwd1		lrrc59	stoml2	rbm22	tmed9	loc646644		gnb1		fbxl5
																																				glt1d1		hbz		gng5	syvn1	srp72	ppp2r2a	arhgdig		dvl2		c12orf57
																																				cldn12		wdr36		gtpbp4	nup54	eif3m	eif4a2	akirin2		arpc1b		gtf2h4.2
																																				mafb		b3galtl		txnrd3	psmb2	c9orf78	etfb	cct7		taldo1		fxr1
																																				klc1		wbp11		brp44l	cpsf6	ywhab	eif1b	zfand5		cycs		sncg
																																				tmem205		fam49b		rap1b	tpp2	creb1	npm1	cnn1		nop58		c11orf60
																																				mgat4b		rilpl2		ctnnbl1	slc2a1	sgta	ctsc	pafah1b1		tpi1		slc30a9
																																				vrk1		chic2		krt19	nop16	api5	ssrp1	aplp2		nucks1		mtx1
																																				pgm3		pten		ss18	rab2b	thrap3	gcdh	ghitm		rbm38		arl6
																																				pms1		slc10a7		cops2	extl3	edc4	smad2	slc16a1		sec61b		nars
																																				ern2		bcam		sfrs6	snrpb2	akirin2	mmgt1	snrpb		sfrs5		rnf146
																																				dpp9		clk1		csde1	sap130	pafah1b1	kpna4	ube2b		clgn		ube2e1
																																				ccdc104		sfrp1		gadd45g	med27	aplp2	aldh9a1	btg2		nop56		kif3a
																																				sdsl		mrpl24		ckb	lrrc47	slc16a1	c11orf59	itgb1bp3		ccdc50		ube2d3
																																				tmem120a		ptcd3		ppap2c	hpgds	ctnnb1	ccng1	mobkl3		hnrnpa1		eif4e
																																				h2afy		rptor		atp1a1	larp1	azin1	cyr61	pmpca		znf326		timm13
																																				dnpep		rasgef1a		rbm25	slc31a1	ctsa	psmc5	med25		ssr2		dynll2
																																				siae		agpat4		atp5f1	rnf4	ccdc25	psmc3	arf5		ppdpf		galnt1
																																				tbc1d16		ripk1		ldhb	adss	pbx1	capzb	ddx17		eif3b		pfkfb1
																																				epb41l5		eprs		cdk4	wtap	mpp1	krt19	pa2g4		vdac2		arl10
																																				cox6c.2		gnas		dci	cbfb	zfand3	chchd2	ppm1a		rps3a		c3orf19
																																				sostdc1		ppp2r3b		btf3l4	dbn1	smarcd1	clta	pgrmc2		psma2		gltpd1
																																				cdk5rap1		polr3e		hnrnph3	scamp3	papola	dusp1	psma5		epcam		alkbh6
																																				park7		pik3ip1		smad2	hyal2	marcksl1	tagln2	tuba4a		tardbp		prpf31
																																				c11orf54		gcat		ard1a	jmjd6	gspt1	prmt1	myef2		mthfd2		clasp1
																																				c1orf172		kank1.2		prdx6	bccip	cstf3	st13	rnpep		rpl37a		fundc1
																																				exd2		tprg1l		cct5	chchd4	alkbh5	grn	rab18		hnrnpab		ctnnal1
																																				uevld		yif1b		hmgn1	fgfr2	cpt2	impdh1	sumo3		ddit4		c9orf80
																																				gramd4		mboat7		hgs	far1	ap3m2	ube2g2	nek9		rbm5		ptplb
																																				agtpbp1		sestd1		skp1	erlec1	snrpc	aes	cope		sec61a1		tmem66
																																				nudt12		gmfb		hnrnpu	eaf2	tmem30a	sdcbp	ppp2r2a		p4hb		osr1
																																				ypel2		sp2		nat13	pmpcb	tktl2	stt3a	eif4a2		sfrs2		c15orf63
																																				pard6b		rnf185		fus	dnajc19	bmp4	rbbp5	ctnnb1		eif4g2		rg9mtd2
																																				hspa14		cnot10		gltscr2	ndufab1	gorasp2	ctnnb1	azin1		sfrs3		psmd3
																																				ropn1l		tmx3		id3	rpl35a	rab6a	azin1	ctsa		hnrnpa2b1		mlf2
																																				suv420h1		mcrs1		rpl27a	denr	cltc	rpl21	rad23b		myc		mcoln1
																																				bcl11a		med8		calm2	rpl22	foxa1	fau	cd2bp2		eef2.1		elavl1
																																				ano1		h2afv		psap	rps16	clns1a	rps9	arcn1		tpt1		zmym4
																																				elp3		dusp6		rpl7a	polr2f	mtpn	amd1	tubb		rps20		rag1ap1
																																				gmppa		stk38l		ywhae	tmem14b	psmd6	bsg	lypla2		hnrpdl		lsm7
																																				c5orf44		sdad1		slc20a1	drg2	zfand5	hadhb	mgrn1		cirbp		nop14
																																				pltp		cyyr1		eif1ax	dcun1d5	ghitm	eno1	ube2a		grasp		sssca1
																																				dnajc3		tbx1		cct8	rhou	tbc1d10a	tkt	psmc2		hnrnpa0		glod4
																																				ccrn4l		psme3		nptn	klhdc3	rnpep	ndufs2	ndfip1		lgals3		kpna3
																																				slc25a46		trmt5		ctsl2	acad9	rab18	ctsa	dlst		c10orf119		ythdf2
																																				ccdc93		saps3		ran	atp6v1b2	slc25a20.2	ddx39	rnf10				cpsf7
																																				smarcc2		urod		rhoa	ip6k2	lpar4	ard1a	srp72				hiat1
																																				plrg1		supt7l		oaz1	upf1	sav1	hnrnpc	eif3m				dhx15
																																				qpct		dvl3		ogt	alas1	gosr1	iscu	rfc4				uchl5
																																				dusp22		foxp4		hmgb3	sgpl1	dgcr8	arpc5	tspan31				esrp1
																																				bmp1		top3b		ddx5	smyd5	fbxo11	etfa	ranbp9				snx3
																																				bet1l		smarcc1		gnb2l1	luc7l	aldob	ppp4c	sumo1				tmem85
																																				b4galnt1		ssr4		rps2	cpne1	rmnd5a	srd5a1	cdc42				plxna1
																																				mest		mfsd11		ilf3	hsdl2	derl1	slc5a8	abi2				gpr107
																																				ctbp1		ctbs		eif3a	rnf13	acvr1	actr2	snap29				cpsf3
																																				srebf2		acp5		ubc	farsb	sfrs13b	ppib	pbx2				cdc40
																																				inpp1		cwf19l2		rps14	nog	rps6kb1	ppp1cb	tmed7				ero1lb
																																				zcchc4		ik		rps18	pdk4	nek2	smn2	ric8a				cnot8
																																				nomo3		akr7a2		rpl3	cox7b	rnf121	prdx6	rap2b				zcchc10
																																				qdpr		utp14a		btf3	taf9b	gpkow	tra2a	kctd10				gmeb1
																																				pan3		dolpp1		rpl5	sdf2	taf5	cox7a2l	m6pr				ythdf3
																																				arf3		med20		eef1g	parvb	clk3	hnrnph2	paip2b				poldip3
																																				wbp2		fam168b		rpl10	rhob	c4orf41	rbbp7	actl6a				idh3a
																																				c19orf62		mrpl12		rps5	utp15	ostf1	ndufs1	mdk				lrrc58
																																				wsb2		ccne1		atp5b	tspan31	pygl	abce1	uba2				pomp
																																				ephx2		gnpnat1		naca.2	cdk2ap1	nipsnap1	cebpd	apex1				apool
																																				gstk1		slc37a2		rpl13a	tob1	ece1	ccnl2	calu				pecr
																																				ccdc138		cant1		hmgn2	ptp4a1	dgcr14	sparc	pak1ip1				rqcd1
																																				c20orf4		e2f4		mgmt	txnl1	prpf8	rad23b	c7orf28b				ica1
																																				fahd2a		rnf111		anp32e	ranbp9	leo1	cd2bp2	c19orf56				e4f1
																																				rgp1		tmem39a		sfrs7	srp68	net1	arcn1	fam96b				aph1a
																																				agbl5		golt1b		bsg	nvl	sf3a2	rpl14	cstf2				ccar1
																																				dnttip1		c12orf32		smn2	gpd1	ykt6	kars	chmp6				hsd17b10
																																				anapc7		gatm		mat2a	cept1	ilk	nckap1	glud1				ext1
																																				fam107a		epb41l3		hadh	psmg1	ddx47	tubb	acbd3				siah1
																																				sft2d2		prdm1		ctsb	sema6d	ccdc45	lypla2	pofut1				hmgcr
																																				flvcr2		zfp36l1		rdbp	arhgdig	srrt	mgrn1	add3				hsbp1
																																				cyb5b		mars		ywhaq	sumo1	pmp22	arglu1	znf207				ctsd
																																				camk1		ncl		rpl12	cdc42	uba52	cct3	cbx3				rab11a
																																				dedd2		scfd1		atr	abi2	rpl34	epb41	sf1				nfkbia
																																				c19orf61		idh3g		rpl11	snap29	rpl35	ube2a	ythdc1				uqcrfs1
																																				st3gal4		ddx54		prps1l1	pbx2	ndufs1	impdh2	vps45				dcaf7
																																				rabl5		unc50		nop56	tmed7	rpl14	gpnmb	midn				cdv3
																																				gsr		insm1		pfn2	ric8a	rpl10a	psmc2	casc3				mmgt1
																																				hebp1		smc1a		tcf3	hspa5	bcas2	acsl1	tcea1				gpnmb
																																				ptpn3		msh6		rpa1	rab10	gclm	slc16a3	tmbim6				supt5h
																																				ndel1		erh		foxc2	dnaja1	gcdh	ndfip1	fam108c1				ftsj1
																																				aldh18a1		e2f8		tbx2	anxa4	fbp1	hmgb2	yars				stim1
																																				tbc1d23		cldn6.2		slc7a8	furin	rpn2	ncapg	rgma				rad21
																																				pcf11		hells		tpi1	ndufaf4	gnl2	eif3h	polr1c				stam2
																																				glb1l		med30		hnrnpd	bat1	gnl3	lsm12	ranbp1				ube2v2
																																				fam73a		pick1		rps25	cxadr	dus3l	rbm39	rab1a				mrto4
																																				slc40a1		pax3		tuba1b	srfbp1	mvp	ptma	c19orf47				trappc4
																																				atrip		wbp4		csnk2b	slc35b1	hm13	reep5	g3bp1				exosc8
																																				usp20		jund		rps23	dnajb12	rplp2	cct5	rbm22				setd6
																																				bcap29		pycr1		hmgb2	lsm14a	cops5	eif3l	ccdc25				crk
																																				eif4e3		rab27b		ilf2	rpf1	rpl37	xbp1	pbx1				ephb4
																																				rfc5		slc7a3		marcks	eif3j	cd81	dvl3	mpp1				nsun2
																																				mrpl17		adipor1		vdac2	tp53bp2	fam48a	brp44l	zfand3				smc4
																																				ezr		cox4i1		gnb1	nup205	etfb	c16orf72	smarcd1				nle1
																																				hccs		mrps17		anxa5	ptp4a2	rpl21	hif1a	papola				tmem167b
																																				cars		pi4kb		lamp1	actr1a	fau	itm2b	marcksl1				hipk2
																																				ttc37		ube2n		arpc1b	rbm8a	rps9	vcp	gspt1				kti12
																																				ubqln2		aagab		fgfr1	mobkl3	kars	arpc2	cstf3				thoc7
																																				ndfip2		cotl1		nkx2-5	ahcy	arglu1	ywhaz	alkbh5				rnaseh2b
																																				btbd10		dnajb14		grasp	ubl5	impdh2	dcaf11	cpt2				pla2g12a
																																				pih1d1		kiaa0247		hnrnpa1	ugdh	eef1b2	hmgn1	ap3m2				banp
																																				spast		robld3		gdi1	rbm4b	rps15	ndrg2	snrpc				wdr3
																																				fbxo3		gtf2b		hsp90b1	jagn1	rpl32	atp5c1	tmem30a				kdm3a
																																				nucb2		pgrmc1		rpl37a	tomm40	rpl9	atp1b1	tktl2				gtf2f1
																																				stxbp3		anxa1		id2	pcm1	rps11	mat2a	bmp4				nob1
																																				bre		sec14l5		clgn	kdm2b	rps26	itgb1	gorasp2				ptbp1
																																				stk19		lgmn		pdcd6ip	gtf2f2.2	rpl17	txnrd3	rab6a				rprd1a
																																				ccbl1		psme4		sfrs5	adam10	rps10	eif5	cltc				papd4
																																				gmds		pias3		tuba4b	prpf6	rps12	dazap2	clns1a				csnk1e
																																				epn2		sqstm1		ociad2	hdac1	rpl13	phb	mtpn				arfgap1
																																				mfn2		map1lc3a		sumo2	acsbg2	rps7	psmc1	tbc1d10a				nfya
																																				add1		eef1d		dact1	wdr61	hnrnpa3	eif3i	slc25a20.2				hes1
																																				epb41l4a		myl6		bambi	kpna2	zmiz2	prdx1	rmnd5a				stx16
																																				epas1		gabarapl2		nucks1	setd8	actr2	metap2	rnf121				mms19
																																				optn		sdhb		ppdpf	cxorf56	ppib	hmgb1	gpkow				slc9a3r1
																																				cnot7		pgk1		eif3b	arl5a	ube2d1	odc1	taf5				mrpl3
																																				ndrg1		hadhb		rbm5	tia1	suz12	sar1a	clk3				arpp19
																																				fbxo33		serinc1		cd9	nup93	ubtf	psmd2	nipsnap1				tmem101
																																				mtmr10		acaa2		sec61b	ccdc109b	ppp2r2d	cs	igsf3				rxrb
																																				snx10		ubl3		tardbp	shmt2	ogdh	rpl23	rnd1				cnih4
																																				elmo1		ndufa10		hmgn3	acly	junb	dlst	pdcd11				trmt6
																																				lnpep		ipp		plin2	smox	hibadh	rnf10	cbx1				actr6
																																				mdm4		adrm1		rbm38	anapc4	dars	rpl10a	cmbl				vav2
																																				ubox5		faf2		cycs	g3bp2	anxa2	nnt	ddah2				senp3
																																				fam50a		nr1d1		ssr2	nol6	pck2	serbp1	med15				tpmt
																																				prmt5		polr3d		snd1	stmn1	c14orf147	pdha1	klf8				znf395
																																				nfe2l2		ccdc53		znf326	leo1	clpp	eef1b2	pds5b				cdc14b
																																				atf5.2		rffl		hnrnpab	net1	rfc2	rps15	ccdc28b				wdr69
																																				ubxn6		ndrg4		sfrs2	sf3a2	iars	rpl32	znf622				ak3
																																				sike1		c5orf32		hnrnpa2b1	ykt6	sccpdh.2	rpl9	top2a				c1d
																																				fam98a		gale		rps3a	txlna	c1orf144	skp1	akirin1				setd4
																																				cttn		gli3		eef2.1	tomm22	cbfa2t2	rps11	usp22				nt5c3l
																																				adamts1		dph5		tpt1	c20orf30	aldh1a2	tp53	zic2				prickle1
																																				tmem49		fgfr3		rps20	lta4h	anxa3	rps13	hsph1				wdr89
																																				abr		vta1		taldo1	rpp30	nup50	eif2s3	eef1e1				mta1
																																				vps37b		ubxn1		mthfd2	ehd1	ube2j2	vdac1	cldnd1				c21orf59
																																				znf143		znf330		ddit4	slc25a13	raf1	eif3c	bub1b				fzd7
																																				c22orf13		blvrb		cirbp	shpk	sfrs13a	tuba1c	ankrd10				sirt6
																																				amotl1		larp1		eif4g2	ercc5	zmat2	tuba1b	acbd6				nat11
																																				impa1		rab3ip		tmem126a	rangrf	trpc4ap	hnrnpu	gtf2a1				cobra1
																																				lsr.1		tax1bp3		hnrpdl	hipk2	c16orf72	nat13	c9orf82				eif2c2
																																				bsdc1		cpsf2		sec61a1	hsbp1	morf4l1	calr	epha4				polr1e
																																				ube2f		slc31a1		ccdc50	c7orf41	kiaa1704	selt	brix1				sap18
																																				kiaa0174		rnf4		dvl2	plxna1	frg1	rps3	tbpl1				dnal4
																																				acox2		mlec		myc	dazap1	taf15	gltscr2	tmem48				nup43
																																				ppp3ca		pin1		hnrnpa0	nhp2l1	c7orf23	hadh	cidea				snrnp40
																																				etfdh		snw1		c10orf119	ppp2r5e	gkap1	actr3	hbxip				rbm26
																																				c16orf35		vps35		lgals3	qki	slc25a26	stmn1	dhrs3				slc35e1
																																				tgfbr1		c13orf1			kti12	slc39a7	srp72	sec63				hs2st1
																																				pam		dctn2			thoc7	tbl2	ftmt	tpp2				snrpf
																																				jak2		adss			rnaseh2b	asl	hsp90ab1	extl3				sap30bp
																																				c19orf63		sars			thoc1	efr3a	btg1	snrpb2				c1orf156
																																				dcxr		tmed4			banf1	sox7	tomm20	sap130				blzf1
																																				slc25a10		hpgds			ube2g1	prelid1	capza2	srfbp1				cdc25c
																																				nedd4l		pcmt1			egr1	uhrf1bp1l	atp6v0c	lsm14a				polr2h
																																				blmh		golga7			dbr1	ywhaq	cct6a	rpf1				rbm12
																																				hbp1		wtap			tsku	rhou	eif5a	tp53bp2				cetn3
																																				znrf1		rab14			tex261	map2k1	cfl1	nup205				znf740
																																				golga5		aldh3a2			cxxc1	phb	hspa9	setd8				mfap3l
																																				wdr45		ak2			taf3	ap3s1	scp2	cxorf56				mcts1
																																				ssbp1		vps26a			lass3	hspa5	ddx3x	arl5a				supt16h
																																				cab39l		cct2			gmnn	rab10	wsb1	tia1				cul4b
																																				nt5dc3		wdr1			snrnp200	dnaja1	uqcrc2	nup93				asw
																																				slc1a5		cbfb			ctcf	gnai3	ldhb	rpp30				qtrt1
																																				tmbim1		dbn1			wibg	spcs3	rheb	ehd1				c8orf42
																																				wasl		nup88			ndufb2	ube2v1	nme2	slc25a13				suds3
																																				slc20a2		lig3			ccar1	lin7c	atf4	pum1				rps17
																																				tcta		lrrc47			tomm70a	ranbp3	txndc5	etf1				rrp7a
																																				wfs1		scamp3			kpna3	snx27	rps19	hspa4				sri
																																				pias4		hyal2			cpsf3	tcf25	eif3k	ctr9				rrp1b
																																				slc25a30		jmjd6			cdc40	cnn3	csde1	smarcb1				vezf1
																																				grsf1		bccip			sppl3	ncor1	rbm25	bub3				fam53a
																																				rcan1		ppp1cc			cwc15	ptk2	atp5f1	c1orf55				grpel1
																																				clcn3		snx6			zcchc10	vat1	hdlbp	frs2				smarcd2
																																				aftph		mbd1			ica1	nthl1	pkm2	drap1				papss1
																																				irs4		ubac1			hsd17b10	smek2	rpl27	kiaa1826				usp7
																																				becn1		xpo7			mfap1	cpne3	tmed2	stard7				ttc30
																																				pccb		nmt2			vangl2	eif1b	eif3m	cox4nb				lypla1
																																				agfg1		dhrs4			znf639	ppp1cb	id3	fgfr4				cgn
																																				coq6		eml4			dad1	yy1	pdcd6ip	cdkal1				slc30a6
																																				ethe1		rnf2			ptcd3	ftmt	rpl17	arvcf				ndufb2
																																				anxa7		dnajc9			mcrs1	trappc3	rps10	fbxl5				vangl2
																																				mkl1		sfxn1			fbxw8	h1fx	rps12	c12orf57				znf639
																																				ppp1r11		abhd3			fbxo42	psmc6	rpl13	gtf2h4.2				dad1
																																				amfr		rnf5			ube4a	psmb1	rps7	fxr1				csnk1g3
																																				ensa		chchd4			sarnp	psmd7	pdia3	sncg				vrk3
																																				serinc3		h2afy2			mrpl38	psmd12	rpl27a	c11orf60				ppp2r3c
																																				arntl		fgfr2			stk38l	ptges3	arf4	slc30a9				slc4a7
																																				fam164a		aldoc			snrpd3	cdc73	csnk1a1	mtx1				cstf1
																																				xpo6		atic			zmat5	ccnl2	calm2	gpr172b				cirh1a
																																				acvr1b		rab7a			gtf2a2.1	nckap1	psap	sec16a				eif1ad
																																				edil3		ppa2			lsm5	cct3	hes2	casp6				slc25a44
																																				pomgnt1		cul3			utp18	epb41	slbp	snupn				tulp3
																																				gpsm1		dlat			smad1	hspd1	rplp1	nat12				grwd1
																																				znf668		c10orf104			plod3	sar1a	rap1b	camk2g				hbz
																																				med16		kdsr			ammecr1	hdlbp	hnrnpd	arl6				wdr36
																																				rtn4ip1		commd8			rrbp1	zfand6	tuba4b	nars				b3galtl
																																				eif4enif1		rapgef1			ggcx	csnk2a2	cldn4	rnf146				wbp11
																																				nek8		gpm6b			rps21	ywhah	rpl7a	ube2e1				fam49b
																																				tmem47		rab4b			polr2d	thoc4	ywhae	kif3a				rilpl2
																																				inf2		nrip1			uap1	mta2	ilf2	ube2d3				chic2
																																				fam108b1		wasf1			wdr74	ctdsp2	got2	eif4e				pten
																																				fbxo7		zmpste24			zc3h10	rsrc2	gadd45g	timm13				serpinh1
																																				tiprl		enoph1			rap2b	mapre1	mdh1	dynll2				seli
																																				pigc		ncoa2			kctd10	st13	rpl15	galnt1				pi4k2b
																																				nek4		sh3bgrl3			m6pr	grn	sfrs18	hoxc6				baz2a
																																				c16orf53		dpysl3			ssr4	impdh1	ppp2cb	junb				papolg
																																				vps37a		uba5			ctbs	ube2g2	actg1	pmp22				dido1
																																				ssbp2		golph3l			smpd4	arpc5	cd63	iars				cyyr1
																																				fam171a1		atp5h			ilk	yes1	tubb2c	fbp1				zranb1
																																				phgdh		drg2			cfp	ubap2	eif4a1	cops5				fbp1
																																				lsm14b		rwdd1			rbm7	dgat2	pabpc1	psma3				psma3
																																				klhl13		tsc22d3			ythdf2	eif2s1	dnaja2	cd81				rpn2
																																				surf2		mobkl1b			pip5k1a	fzd2	rpl24	rpn2				rpl17
																																				ppm1b		maea			pecr	psmc5	itm2a	gnl2				junb
																																				rap1a		rgs2			sec62	nnt	eif3d	dars				pmp22
																																				rbpms2		etfa			cdc34	prpf18	ddx21	anxa2				iars
																																				wash1		slc25a29			mettl9	cnbp	rpl19	ndufs1				cops5
																																				vps11		rap2a			qrich1	nfyc	rpl18a	rpl17				cd81
																																				kiaa1012		mri1			mad1l1	rbm45	pcbp3	mvp				gnl2
																																				ap2s1		dcun1d5			pla2g12a	ssb	slc25a3	c14orf147				dars
																																				tubb6		lims1			banp	psmd13	rplp0	zranb1				anxa2
																																				lancl1		fam136a			wdr3	tmem222	rpl6	kiaa1267				ndufs1
																																				rtn1		tbrg1			kdm3a	gps1	rpl8	phactr4				mvp
																																				pisd		cdk9			gtf2f1	kpna4	rps6	sccpdh.2				c14orf147
																																				mcfd2		oxr1			nob1	c11orf59	atp5a1	mrpl38				kiaa1267
																																				pfkp		gipc1			ptbp1	psmc3	rpl7	kiaa1026				sparc
																																				pde4b		efhd1			rprd1a	psma7	rpsa	hk1				sdad1
																																				ctsz		gas6			cdc20	eif3h	rsl24d1	yrdc				h2afv
																																				camk2d		rhob			ddx47	lsm12	cct8	vps4b				pdlim1
																																				cldn5		srp68			ccdc45	rbm39	nptn	sox11				dusp6
																																				ttc33		gtpbp5			srrt	ptma	ctsl2	cdc20				myl9
																																				nrp1		tob1			zfp36l1	reep5	ran	hspbp1				herpud1
																																				dok4		brp44			idh3a	eif5	rhoa	map3k10				stk38l
																																				rpe65		nvl			papd4	psmc1	oaz1	prcc				gps2
																																				slc46a1		aimp1			gps2	eif3i	ogt	slc30a2				mospd3
																																				nudt16		mrps7			sfrs13a	prdx1	hmgb3	asl				tyk2
																																				ada		shmt1			zmat2	metap2	ddx5	prelid1				psme3
																																				itfg3		lrig3			polr2c	hmgb1	elovl7	ahctf1				phactr4
																																				neu1		ppm1g			idh3g	pno1	cops2	uhrf1bp1l				sccpdh.2
																																				fah		gpd1			myl9	psmd2	gnb2l1	ywhaq				mrpl38
																																				eepd1		top2a			herpud1	cs	rps2	map2k1				kiaa1026
																																				adipor2		akirin1			eed	fn1	psmd8	phb				parn
																																				aplp1		btg2			cdc5l	serbp1	pfn2	ap3s1				klf5
																																				col6a1		rae1			ythdf1	pdha1	gdi1	smad7				trmt5
																																				galntl1		rer1			qsox2	eif2s3	slc7a8	dnajc8				saps3
																																				ppme1		tmed5			zswim4	vdac1	ilf3	vgll4				supt7l
																																				tgfb1i1		slc2a1			mettl14	eif3c	eif3a	polr2b				gatm
																																				ephx1		dnajc17			pitrm1	tuba1c	ubc	ubqln4				taf6l
																																				nlgn3		strbp			stag2	hsp90ab1	rps14	snrnp70				urod
																																				dync1li2		gtf2e2			slc39a7	btg1	rps18	zfr				prdx5
																																				prpsap1		polr2g			cgnl1	tomm20	rpl3	peli1				erh
																																				lcat		arrdc3			cops6	capza2	btf3	arpc3				e2f8
																																				cntfr		ubl5			jund	atp6v0c	rpl5	tmx2				eny2
																																				prph		copg2			pi4kb	cct6a	eef1g	timm17a				cldn6.2
																																				pea15		nop16			gabarapl2	eif5a	rpl10	trappc3				u2af1
																																				tpd52l1		ugdh			cox4i1	cfl1	rps5	ppp1r14b				msh6
																																				gabarapl1		rpn1			pgk1	hspa9	atp5b	hspa5				pds5a
																																				ndrg3		ppat			hadhb	scp2	naca.2	gnai3				cdc20
																																				lgtn		eif2b2			acaa2	ddx3x	rpl13a	znf346				smc1a
																																				wars		arhgap21			ube2n	wsb1	rps23	psmd4				nup35
																																				scn3b		rbm4b			slc25a24	uqcrc2	ckap4	zfand6				hells
																																				efhc1		rnmt			sox9	timm23	rpl11	bat3				yrdc
																																				gpaa1		jagn1			pax6	idh2	csnk2b	h1fx				vps4b
																																				fam70a		tomm40			trpc4ap	rheb	anxa5	clk2				sox11
																																				tecr		pcm1			dph5	nme2	hsp90b1	pfkm				impa2
																																				dhrs7b		kdm2b			ubxn1	atf4	dhx9	arpc4				mfsd5
																																				fez1		eftud2			atpif1	txndc5	tbrg4	csnk2a2				rarg
																																				tac1		cxadr			ifrd1	rps19	spint2	ywhah				rcc2
																																				snca		slc35b1			prdx3	eif3k	rps25	gyg1				nrm
																																				cugbp2		gtf2f2.2			kcmf1	pkm2	rcc1	thoc4				med30
																																				fam171a2		adam10			bin1	rpl27	krt8	lsm2				efna4
																																				stxbp1		prpf6			fbxo9	arf4	snd1	arl1				necap1
																																				dner		hdac1			nup88	mdh1	rpl12	jup				pick1
																																				c4orf31		acsbg2			rapgef1	rpl15	ywhaq	mta2				hspbp1
																																				klhdc8a		farsa			pcmt1	sfrs18	plin2	fos				prcc
																																				hmgcs1		psmb2			adsl	ppp2cb	rpa1	nucb1				slc30a2
																																				cyb5r2		cpsf6			golga7	actg1	cox5a	zc3h11a				sall3
																																				scg2		cops8.2			cct2	cd63	atp1a1	atp5g1				dhcr7
																																				dtnbp1		ddx19b			dlat	tubb2c	ss18	psma1				rhou
																																				ss18l1		elf2			wdr1	eif4a1	ociad2	dync1i2				foxf1
																																				def8		dnajb12			pin1	pabpc1	h2afz	cnbp				hand1
																																				abca4		wdr61			snw1	dnaja2	tmem126a	ncor1				hhex
																																				nrsn1		prkcsh			dctn2	rpl24	lamp1	nfyc				smad7
																																				shank2		eif3j			tmed4	itm2a	cd9	rbm45				cebpa
																																				lim2		ptp4a2			ppp1cc	eif3d	gnb1	anp32a				dnajc8
																																				tfap2b		rab2b			snx6	ddx21	nop58	pfn1				ccdc45
																																				c9orf98		fip1l1			mbd1	rpl19	arpc1b	psmd1				ece1
																																				nrcam		kpna2			h2afy2	rpl18a	taldo1	tceb2				ube2v1
																																				atp1a3		cdc37			aldoc	pcbp3	id2	ctdsp2				tsku
																																				tmem45b		adh5p4			atic	slc25a3	sfrs5	usp10				tex10
																																				c1qtnf4		rbm8a			aldh9a1	rplp0	tpi1	ipo5				erlin2
																																				tssc1		ppp2ca			lims1	rpl6	cycs	ddost				ptk2
																																				cry2		loc646644			etfa	rpl8	sec61b	sub1				vat1
																																				nfxl1		mobkl3			dpysl3	rps6	hnrnpa1	sdha				leo1
																																				flrt1		med25			rwdd1	atp5a1	clgn	ndufv1				lin7c
																																				mfn1		ppm1a			mobkl1b	rpl7	nop56	sdf4				sf3a2
																																				usp46		pgrmc2			maea	rpsa	ssr2	psmb1				rab10
																																				fads2		sec16a			gpr177	rsl24d1	nucks1	psmd7				sf3b4
																																				tspan5		casp6			lhx1	rps27a	vdac2	ap1m1				hibadh
																																				crmp1		snupn			nxn	ppp1r14b	ppdpf	spcs3				snrnp70
																																				cadm4		gpr172b			slc44a2	psmd4	eif3b	psmd12				thoc4
																																				pla2g6		usp22			gnai3	jup	rps3a	phb2				trappc3
																																				dscam		zic2			spcs3	anp32a	znf326	ptges3				ppp1r14b
																																				nphp3		nat12			ube2v1	psmd1	rpl37a	ssb				cnih
																																				rufy3		hsph1			lin7c	usp10	mthfd2	sat1				ubqln4
																																				chrnb2		extl3			ranbp3	ddost	psma2	rsrc2				hspa5
																																				elmod1		snrpb2			snx27	sub1	rbm5	mapre1				ranbp3
																																				ophn1		eef1e1			tcf25	phb2	hnrnpab	tef				snx27
																																				gdi2		lsm14a			cnn3	tef	sec61a1	tpm4				znf346
																																				lhx8		camk2g			ube2b	ddx42	p4hb	ddx42				yes1
																																				mapre3		znf622			paip2b	u2af2	sfrs2	u2af2				flot2
																																				fhl3		ctr9			tuba4a	capzb	eif4g2	laptm4a				tmx2
																																				abhd6		smarcb1			sumo3	clta	sfrs3	mcl1				nthl1
																																				dpp10		bub3			actl6a	dusp1	hnrnpa2b1	psmd13				ubap2
																																				slc6a13		pum1			trip12	tagln2	ddit4	kiaa0494				ykt6
																																				scd		etf1			vps29	aes	epcam	eif1b				cnot3
																																				lhx9		fgfr4			tmem147	abce1	eef2.1	ssrp1				ogdh
																																				tmem163		ccdc28b			ube2l3	hif1a	tpt1	kpna4				clk2
																																				ptprz1		cldnd1			snrpb	itm2b	rps20	c11orf59				gnai3
																																				odf3		bub1b			mdk	vcp	hnrpdl	psmc5				psmd4
																																				nefl		ankrd10			uba2	arpc2	myc	psmc3				dgat2
																																				gnpda2		acbd6			apex1	ywhaz	cirbp	capzb				nono
																																				ppp5c		gtf2a1			calu	calr	hnrnpa0	chchd2				hnrnpa3
																																				diablo		c9orf82			pak1ip1	selt	lgals3	clta				cdc73
																																				ctu1		epha4			c7orf28b	flot2		dusp1				atp5g1
																																				cse1l		brix1			ncor1	cnot3		tagln2				ddx42
																																				commd10		tbpl1			ptk2	atp1b3		st13				gyg1
																																				chid1		tmem48			pfkm	smarce1		grn				prpf18
																																				vps18		cidea			ap1m1	tsn		impdh1				mta2
																																				fuca2		tpp2			stip1	sec13		ube2g2				sdha
																																				rbm42		sap130			rab2a	bat3		aes				usp10
																																				hey1		srfbp1			cct4	timm17a		sdcbp				psmd7
																																				cyp4v2		rpf1			rbbp7	npepl1		stt3a				aes
																																				rnf139		tp53bp2			cox7a2l	sdha		amd1				psma1
																																				dctn4		nup205			peli1	ndufv1		arpc5				anp32a
																																				med7		setd8			znf346	sdf4		ppp1cb				psmd1
																																				c19orf6		cxorf56			stt3a	tpm4		tra2a				atp1b3
																																				hcca2		arl5a			nono	laptm4a		rbbp7				syf2
																																				trappc9		tia1			capza1	mcl1		abce1				ssb
																																				hsd17b4		nup93			cmpk1	kiaa0494		ccnl2				dcaf11
																																				pacsin2		hspa4			pls3	sdcbp		nckap1				rpl35
																																				auh		c1orf55			enpp2	amd1		cct3				metrnl
																																				triobp		frs2			mst4	dcaf11		epb41				ncor1
																																				arhgap1		drap1			gpc4	rps3		eif3h				tef
																																				gpx1		kiaa1826			cops8.2	vgll4		lsm12				ndufv1
																																				nfix		stard7			ddx19b	arpc3		rbm39				psmc5
																																				mfge8		cox4nb			elf2	arpc4		ptma				eif3h
																																				thtpa		fbxl5			fip1l1	nucb1		reep5				gps1
																																				gtpbp10		c12orf57			birc2	dync1i2		hif1a				clta
																																				gnb4		gtf2h4.2			ppp2ca	mgat2		itm2b				smarce1
																																				c5orf24		fxr1			loc646644	fos		vcp				rpl28
																																				ppp2r4		sncg			pum1	pfn1		arpc2				eif5
																																				ncald		c11orf60			etf1	cbs		ywhaz				psmd2
																																				sap30l		slc30a9			hspa4	zfr		dcaf11				serbp1
																																				lmf2		mtx1			med25	snn		eif5				nnt
																																				sytl2		arl6			ppm1a	wibg		psmc1				pno1
																																				atg4a		nars			pgrmc2	cenpa		eif3i				u2af2
																																				plekha1		rnf146			ivns1abp	serpine2		prdx1				cct3
																																				vstm2l		ube2e1			eftud2	lamp2		metap2				sar1a
																																				ppox		kif3a			farsa	chd4		hmgb1				rps16
																																				l1cam		ube2d3			prkcsh	dimt1l		sar1a				rpl31
																																				hectd3		eif4e			cdc37	tmed2		psmd2				eif1b
																																				ift52		timm13			ctr9	stom		cs				kpna4
																																				c17orf28		commd5			smarcb1	ccdc124		rpl23				st13
																																				tspan17		ccdc109b			bub3	tcf7l1		nnt				hif1a
																																				c3orf37		memo1			c1orf55	actr3		serbp1				rpl21
																																				tp53i11		psmd14			frs2	ap2a2		pdha1				tra2a
																																				rnf145		pcyt2			drap1	atg3		eif2s3				psmc1
																																				slc44a1		copb1			kiaa1826	pfkfb1		vdac1				rps15
																																				rgs4		slc25a39			stard7	xbp1		eif3c				lsm12
																																				pggt1b		c7orf42			cox4nb	rplp1		tuba1c				itm2b
																																				larp6		ubl7			memo1	mccc2		calr				vcp
																																				pef1		pdcd4			c7orf42	atp6v1c1		selt				arpc2
																																				bbs5		ppap2a			pdcd4	chd8		rps3				ywhaz
																																				c18orf10		shmt2			ppfia1	usp14		ftmt				calr
																																				dnajb11		tmem128			ldb1	prmt1		hsp90ab1				hsp90ab1
																																				sbf2		exoc7			kiaa0182	acsl1		btg1				ldhb
																																				wdr37		sirt5			ubqln4	c1orf77		tomm20				eif3i
																																				hip1r		actr1a			arrb2	ucp2		capza2				pkm2
																																				pcdh1		tmem59			pmp22	rab5a		atp6v0c				eef1b2
																																				gga1		acly			uba52	ddx39		cct6a				rheb
																																				harbi1		ivns1abp			rpl34	ppp4r1		eif5a				eif2s3
																																				adal		fam20b			rpl35	luc7l2		cfl1				rpl15
																																				hibch		ube2k			ndufs1	ncoa5		hspa9				ftmt
																																				bcs1l		ahcy			rpl14	mbd3		scp2				btg1
																																				arih2		med27			rpl10a	htatsf1		ddx3x				tomm20
																																				limd2		smox			bcas2	sparc		wsb1				capza2
																																				sufu		anapc4			cenpa	coro1c		uqcrc2				atp6v0c
																																				senp1		g3bp2			smarca5	sae1		rheb				cct6a
																																				fbxo45		nol6			csnk1g1	hdgf		nme2				eif5a
																																				prrg1		ppfia1			rps28p9	csnk1a1		atf4				nme2
																																				csnk1d		ldb1			sf3b2	srp54		txndc5				atf4
																																				raver1		gxylt1			des.1	eif4a3		rps19				sfrs18
																																				acot12		asb13			syf2	hnrnph2		eif3k				arf4
																																				rassf5		pafah1b3			gsn	odc1		hdlbp				ppp2cb
																																				aadat		suclg2			psma3	ipo7		pkm2				actg1
																																				tsnax		comt			sgk1	ctdspl2		rpl27				cd63
																																				prkar1a		wdr70			cdknx	lrrc59		arf4				tubb2c
																																				adarb1		esd			rpl28	ctnnd1		mdh1				eif4a1
																																				cetn1		kiaa0182			suclg1	itgb1		rpl15				pabpc1
																																				heca		psma3			gpt2	polr2c		sfrs18				dnaja2
																																				ap1s2		polr2f			cebpd	cript		ppp2cb				rpl24
																																				gng7		rpl22l1			metrnl	ltv1		actg1				itm2a
																																				fbxl3		dnajc19			actn1	sall2		cd63				eif3d
																																				coro2b		kiaa0317			gtf2h1	cldn7		tubb2c				ddx21
																																				nploc4		egr1			matr3	gng5		eif4a1				rpl19
																																				fam3a		eif4h			ppp2r1b	ola1		pabpc1				rpl18a
																																				vps25		ndufab1			ppil2	gtpbp4		dnaja2				vgll4
																																				carhsp1		rpl35a			krr1	txnrd3		rpl24				polr2b
																																				pepd		dbr1			ssbp3	rap1b		itm2a				zfr
																																				rab24		eif2b3			rpf2	slbp		eif3d				peli1
																																				tubb3		sf3b2			map2k1	khsrp		ddx21				arpc3
																																				cyp51a1		denr			cyp26a1	ccna2		rpl19				timm17a
																																				homer2		syf2			hes2	c17orf85		rpl18a				zfand6
																																				gpm6a		metrnl			tram1	krt19		pcbp3				bat3
																																				cyfip2		rpl28			kdelr2	dhx9		slc25a3				h1fx
																																				tasp1		rps16			ccdc124	tbrg4		rplp0				pfkm
																																				dirc2		ube2g1			cops3	cldn4		rpl6				arpc4
																																				cdk5r2		tsku			rbm17	tbx2		rpl8				csnk2a2
																																				klhl20		cyb5a			tmpo	tmed9		rps6				ywhah
																																				tyro3		asmtl			nol10	scamp2		atp5a1				lsm2
																																				fam125b		ssr3			c19orf56	cops2		rpl7				arl1
																																				xrcc3		rpl22			fam96b	ebag9		rpsa				jup
																																				c14orf4		tmem14b			cstf2	sfrs6		rsl24d1				fos
																																				c5orf22		tex261			c7orf20	csde1		rab10				nucb1
																																				cyth2		cxxc1			ube2i	gadd45g		dnaja1				zc3h11a
																																				fam89a		taf3			xrn2	ckb		ube2v1				dync1i2
																																				usp5		rps28p9			chmp6	ppap2c		lin7c				cnbp
																																				snap91		rnf7			dync1li1	atp1a1		ranbp3				nfyc
																																				mllt1		atp5l			ppp2r2a	rbm25		snx27				rbm45
																																				kifap3		myl1			tubb	atp5f1		tcf25				pfn1
																																				enc1		thbs1			glud1	ldhb		cnn3				tceb2
																																				gtpbp1		sgk1			ndfip1	cdk4		ptk2				ctdsp2
																																				oscp1		cdknx			dpm1	anxa5		vat1				ipo5
																																				mtbp		eno1			wdr77	ckap4		nthl1				ddost
																																				sox4		cast			c20orf43	arpc1b		smek2				sub1
																																				ribc2		atp5d			copa	sfrs9		cpne3				sdf4
																																				sirt1		lass3			rbm16	eif3l		yy1				psmb1
																																				zufsp		gsn			gnai1	ralb		psmc6				ap1m1
																																				c12orf5		actn1			irf2bp2	btf3l4		cdc73				spcs3
																																				psip1		rpl18			tmem33	eif1ax		hspd1				psmd12
																																				slc7a5		suclg1			mapk1	mgmt		yes1				phb2
																																				dapk1		gpt2			abi1	anp32e		ubap2				ptges3
																																				psat1		cebpd			sf3a1	pdia3		dgat2				sat1
																																				arfgap2		des.1			abcf3	ppp4c		eif2s1				rsrc2
																																				btbd3		gtf2h1			pdia6	ppid		fzd2				mapre1
																																				pgap3		timm44			scyl1	dci		prpf18				tpm4
																																				galk2		mrpl38			cnn1	hnrnph3		tmem222				laptm4a
																																				orc5l		kiaa1026			acbd3	ard1a		gps1				mcl1
																																				cbr4		upk1a			pofut1	cct5		psma7				psmd13
																																				znf509		rbm17			add3	hmgn1		pno1				kiaa0494
																																				btbd8		cebpz			znf207	hgs		fn1				ssrp1
																																				enosf1		taf9b			cbx3	skp1		timm23				c11orf59
																																				fbxw7		utp18			sf1	hnrnpu		idh2				psmc3
																																				arhgap26		tnfrsf10b			ythdc1	nat13		rps27a				capzb
																																				abat		smad1			vps45	fus		flot2				chchd2
																																				atp6v0a1		cox7b			midn	gltscr2		cnot3				dusp1
																																				thop1		zdhhc8			casc3	id3		atp1b3				tagln2
																																				ttyh1		rpe			tcea1	rpl27a		smarce1				grn
																																				fezf1		nup155			tmbim6	calm2		tsn				impdh1
																																				rasa3		bckdhb			fam108c1	psap		sec13				ube2g2
																																				tfap2e		sdf2			yars	rpl7a		npepl1				sdcbp
																																				b3gat2		ngdn			rgma	ywhae		mgat2				stt3a
																																				adat2		plod3			polr1c	cct8		cbs				amd1
																																				fdxr		ammecr1			notch1	nptn		snn				arpc5
																																				elmod2		prkag2			vat1	ctsl2		slc29a2				ppp1cb
																																				neurl		rrbp1			nthl1	ran		riok2				rbbp7
																																				sox9		rbmx			smek2	rhoa		txlna				abce1
																																				ttc39b		imp4			cpne3	oaz1		tomm22				ccnl2
																																				ahsa1		spry2			ndufb10	ogt		atpif1				nckap1
																																				gpr137b		surf6			myd88	hmgb3		ifrd1				epb41
																																				fry		cops3			zranb2	ddx5		nono				rbm39
																																				ate1		tmpo			atg3	gnb2l1		capza1				ptma
																																				bscl2		nol10			gclm	rps2		cmpk1				reep5
																																				wnt5b		hpgd			gcdh	ilf3		sucla2				prdx1
																																				slc35c2		fut8			fbp1	eif3a		rpl36				metap2
																																				plat		snai2			rpn2	ubc		rpl31				hmgb1
																																				ywhag		hk1			gnl2	rps14		sf3b4				cs
																																				cxcl12		tnnt3			gnl3	rps18		cnih				rpl23
																																				flcn		nmd3			dus3l	rpl3		c12orf11				pdha1
																																				ttc38		apoo			atp6v1c1	btf3		c1orf52				vdac1
																																				alg5		ndufaf4			chd8	rpl5		pex19				eif3c
																																				wipi1		cpsf4			rab11a	eef1g		psma4				tuba1c
																																				ca6		ndufb10			copb2	rpl10		pcna				selt
																																				il1b		cabc1			nfkbia	rps5		taf12				rps3
																																				papss2		mtch2			c3	atp5b		pax7				cfl1
																																				scin		myd88			uqcrfs1	naca.2		chst13				hspa9
																																				was		obfc1			dcaf7	rpl13a		tspan3				scp2
																																				zbtb48		scmh1			cdv3	hmgn2		b3gat3				ddx3x
																																				acy1.1		c7orf41			npm1	sfrs7		wibg				wsb1
																																				haghl		cfp			mmgt1	bsg		dimt1l				uqcrc2
																																				rasgrp1		psen1			eif6	smn2		ap2b1				txndc5
																																				sfxn3		copg			gpnmb	mat2a		cenpa				rps19
																																				cnp		slc35b2			csnk1e	hadh		serpine2				eif3k
																																				rps6ka3		c3			psen1	ctsb		lamp2				hdlbp
																																				c5orf4		spcs2			copg	prdx6		chd4				rpl27
																																				tmem5		kiaa1310			spcs2	slc20a1		slc30a1				mdh1
																																				mmp24		sephs1			kiaa1310	rdbp		stom				pcbp3
																																				ube2z		creb3			sephs1	gadd45a		lhx1				slc25a3
																																				gnaq		gltpd1			cpsf7	rpl12		ccdc124				rplp0
																																				cbr1		rg9mtd2			gmeb1	gdi1		actr3				rpl6
																																				appl2		nop14			lrrc58	rpl11		psmd8				rpl8
																																				chst12		sssca1			rqcd1	krt5.7		tcf7l1				rps6
																																				ankrd13c		rbm7			siah1	nop56		ap2a2				atp5a1
																																				sdr16c5		ythdf2			cd82	nop58		notch1				rpl7
																																				stxbp6		cpsf7			ctsd	pdcd6ip		atg3				rpsa
																																				gzf1		map2k5			bap1	clgn		stmn1				rsl24d1
																																				rfx2		uchl5			kdelr1	pfn2		ss18				dnaja1
																																				ppp1r14c		plxna1			anxa11	elovl7		pfkfb1				tcf25
																																				seh1l		pip5k1a			mxi1	slc7a8		mccc2				cnn3
																																				pi4ka		gmeb1			arfgap1	hspa8		mst1				smek2
																																				psmb3		lrrc58			nfya	hnrnpd		thoc1				cpne3
																																				atp6v0d1		pecr			hes1	rps25		tp63				yy1
																																				ube2h		rqcd1			yrdc	tuba1b		snrnp200				psmc6
																																				pex11b		aph1a			vps4b	csnk2b		wdr18				hspd1
																																				flii		sec62			mvp	rps23		banf1				eif2s1
																																				bpgm		siah1			hm13	arnt		brd9				fzd2
																																				fbxo31		cd82			smg7	hmgb2		ppp2r1b				tmem222
																																				zer1		hmgcr			cript	ilf2		lmnb1				psma7
																																				gca		hsbp1			syncrip	foxn3		srp54				fn1
																																				rab40b		dazap1			fscn1	marcks		ppp4r1				timm23
																																				chac2		ctsd			nudt21	sec23b		syncrip				idh2
																																				mrpl43		bap1			ppp2r5c	grasp		ucp2				rps27a
																																				renbp		kdelr1			sccpdh.2	vdac2		brd7				tsn
																																				tmem144		rab11a			brd9	gnb1		ppp2r5c				sec13
																																				tbc1d24.1		smpd4			lmnb1	lamp1		atp6v1c1				npepl1
																																				cuedc1		copb2			brd7	cd9		htatsf1				mgat2
																																				ift57		nhp2l1			mettl3	ppdpf		kiaa0020				cbs
																																				hdhd1a		cdc34			ltv1	eif3b		ctnnd1				snn
																																				pelo		nfkbia			yipf5	rbm5		usp14				slc29a2
																																				man1b1		uqcrfs1			sall2	sec61b		luc7l2				riok2
																																				sec11c		dcaf7			myod1	tardbp		eif4a3				txlna
																																				bdh2		anxa11			prpf4	hnrnpa1		prmt1				tomm22
																																				ecsit		cdv3			prkaa1	rcc1		rbbp5				atpif1
																																				pex1		npm1			c1orf144	snd1		ddx39				ifrd1
																																				fam46a		mmgt1			zeb2	tpi1		hnrnpc				capza1
																																				naif1		gpnmb			c16orf72	clock		hnrnph2				cmpk1
																																				loh12cr1		polr2i			morf4l1	id2		sparc				sucla2
																																				iqcb1		mettl9			kiaa1704	plin2		itgb1				rpl36
																																				c22orf25		rangrf			cldn4	sfrs5		odc1				c12orf11
																																				cutc		c1orf128			cldn7	col4a3bp		csnk1a1				c1orf52
																																				ltbp1		qrich1			tbl2	tuba4b		chd8				pex19
																																				tnks2		srp19			tmed9	spint2		c1orf77				psma4
																																				lipa		mxi1			ergic2	fgfr1		rab5a				pcna
																																				c22orf9		mad1l1			bnip3	krt8		ncoa5				taf12
																																				tubgcp4		ppp2r5e			uqcrc1	ssr2		mbd3				chst13
[truncated: 1,477 more rows]
[truncated: 17 more columns]
